# Supplementary material for: Genome-wide identification and comprehensive analyses of NAC transcription factor gene family and expression analysis under Fusarium kyushuense and drought stress conditions in Passiflora edulis
Source: Frontiers journal article supplement (doi:10.3389/fpls.2022.972734), 2022-08-25
Supplement: Data_Sheet_1.ZIP [file Data_Sheet_1.ZIP]

## Sheet: Supplementary Table 10
Supplementary Table 10. Putative Predicted transcription factors and enrichment analysis of PeNAC genes
TF ID	TF annotation	TF Family	PeNAC genes	start	stop	strand	score	p-value	q-value	Matched sequence
AT4G38910	BPC5	BBR-BPC	PeNAC007	857	886	-	41.3797	3.15e-15	3.1e-10	AGAGAGAGAGAGAGAGAAGGACAGAGAGAG
AT4G38910	BPC5	BBR-BPC	PeNAC007	859	888	-	41.3797	3.15e-15	3.1e-10	AGAGAGAGAGAGAGAGAGAAGGACAGAGAG
AT2G01930	BPC1	BBR-BPC	PeNAC023	748	771	-	42.0156	4.97e-15	9.7e-10	GAGAGAGAGAGAGAGAGAGAGAGC
AT2G01930	BPC1	BBR-BPC	PeNAC023	746	769	-	41.4062	1.66e-14	1.6e-09	GAGAGAGAGAGAGAGAGAGAGCGA
AT2G01930	BPC1	BBR-BPC	PeNAC021	831	854	-	40.4219	4.03e-14	2.1e-09	GAGAGAGAGAGAGAGAGAGAGGGG
AT5G42520	BPC6	BBR-BPC	PeNAC046	59	79	+	40.5479	4.84e-14	2.4e-09	ctctctctctctctctctctc
AT5G42520	BPC6	BBR-BPC	PeNAC023	749	769	+	40.5479	4.84e-14	2.4e-09	ctctctctctctctctctctc
AT5G42520	BPC6	BBR-BPC	PeNAC023	751	771	+	40.5479	4.84e-14	2.4e-09	ctctctctctctctctctctc
AT5G42520	BPC6	BBR-BPC	PeNAC021	834	854	+	40.5479	4.84e-14	2.4e-09	ctctctctctctctctctctc
AT2G01930	BPC1	BBR-BPC	PeNAC057	222	245	-	39.8594	5.24e-14	2.1e-09	GAGAGAGAGAGAGAGATAGAGAGA
AT2G01930	BPC1	BBR-BPC	PeNAC058	525	548	-	39.8594	5.24e-14	2.1e-09	GAGAGAGAGAGAGAGATAGAGAGA
AT2G01930	BPC1	BBR-BPC	PeNAC021	833	856	-	39.625	6.58e-14	2.1e-09	AAGAGAGAGAGAGAGAGAGAGAGG
AT4G38910	BPC5	BBR-BPC	PeNAC023	743	772	-	33.5823	7.03e-14	4.6e-09	CGAGAGAGAGAGAGAGAGAGAGAGCGACAG
AT5G42520	BPC6	BBR-BPC	PeNAC021	832	852	+	38.5479	7.29e-14	2.9e-09	ccctctctctctctctctctc
AT2G01930	BPC1	BBR-BPC	PeNAC007	866	889	-	39.2031	8.87e-14	2.5e-09	GAGAGAGAGAGAGAGAGAGAAGGA
AT2G01930	BPC1	BBR-BPC	PeNAC046	58	81	-	38.4688	1.5e-13	3.2e-09	AAGAGAGAGAGAGAGAGAGAGAGT
AT4G38910	BPC5	BBR-BPC	PeNAC023	741	770	-	31.481	1.51e-13	6.1e-09	AGAGAGAGAGAGAGAGAGAGAGCGACAGGG
AT4G38910	BPC5	BBR-BPC	PeNAC046	55	84	-	31.4304	1.56e-13	6.1e-09	GAAAAGAGAGAGAGAGAGAGAGAGAGTGCA
AT2G01930	BPC1	BBR-BPC	PeNAC046	56	79	-	38.3281	1.73e-13	3.2e-09	GAGAGAGAGAGAGAGAGAGAGTGC
AT2G01930	BPC1	BBR-BPC	PeNAC057	224	247	-	38.3125	1.8e-13	3.2e-09	GAGAGAGAGAGAGAGAGATAGAGA
AT2G01930	BPC1	BBR-BPC	PeNAC058	527	550	-	38.3125	1.8e-13	3.2e-09	GAGAGAGAGAGAGAGAGATAGAGA
AT4G38910	BPC5	BBR-BPC	PeNAC007	855	884	-	30.7848	2.05e-13	6.7e-09	AGAGAGAGAGAGAGAAGGACAGAGAGAGGG
AT5G42520	BPC6	BBR-BPC	PeNAC046	57	77	+	37.4795	2.17e-13	7.2e-09	cactctctctctctctctctc
AT5G42520	BPC6	BBR-BPC	PeNAC007	869	889	+	37.3151	3.13e-13	8.9e-09	ttctctctctctctctctctc
AT4G38910	BPC5	BBR-BPC	PeNAC008	861	890	-	28.0127	5.76e-13	1.6e-08	GGAGAGAGAGAGAGAAGGACAGAGAGAGGG
AT4G38910	BPC5	BBR-BPC	PeNAC007	861	890	-	27.7089	6.64e-13	1.6e-08	GGAGAGAGAGAGAGAGAGAGAAGGACAGAG
AT2G01930	BPC1	BBR-BPC	PeNAC023	744	767	-	36.5938	7.94e-13	1.3e-08	GAGAGAGAGAGAGAGAGAGCGACA
AT4G38910	BPC5	BBR-BPC	PeNAC023	747	776	-	26.8354	8.68e-13	1.7e-08	AGCACGAGAGAGAGAGAGAGAGAGAGAGCG
AT5G42520	BPC6	BBR-BPC	PeNAC046	61	81	+	36.4384	8.92e-13	2e-08	ctctctctctctctctctctt
AT5G42520	BPC6	BBR-BPC	PeNAC021	836	856	+	36.4384	8.92e-13	2e-08	ctctctctctctctctctctt
AT4G38910	BPC5	BBR-BPC	PeNAC021	826	855	-	26.481	9.59e-13	1.7e-08	AGAGAGAGAGAGAGAGAGAGAGGGGAAGGG
AT4G38910	BPC5	BBR-BPC	PeNAC023	739	768	-	26.3418	9.85e-13	1.7e-08	AGAGAGAGAGAGAGAGAGAGCGACAGGGAA
AT4G38910	BPC5	BBR-BPC	PeNAC007	853	882	-	25.9367	1.15e-12	1.7e-08	AGAGAGAGAGAGAAGGACAGAGAGAGGGAT
AT4G38910	BPC5	BBR-BPC	PeNAC008	859	888	-	25.9367	1.15e-12	1.7e-08	AGAGAGAGAGAGAAGGACAGAGAGAGGGAT
AT2G01930	BPC1	BBR-BPC	PeNAC023	750	773	-	36.0469	1.2e-12	1.8e-08	ACGAGAGAGAGAGAGAGAGAGAGA
AT5G42520	BPC6	BBR-BPC	PeNAC057	225	245	+	36	1.25e-12	2.1e-08	ctctatctctctctctctctc
AT5G42520	BPC6	BBR-BPC	PeNAC058	528	548	+	36	1.25e-12	2.1e-08	ctctatctctctctctctctc
AT5G42520	BPC6	BBR-BPC	PeNAC057	227	247	+	35.9315	1.35e-12	2.1e-08	ctatctctctctctctctctc
AT5G42520	BPC6	BBR-BPC	PeNAC058	530	550	+	35.9315	1.35e-12	2.1e-08	ctatctctctctctctctctc
AT2G01930	BPC1	BBR-BPC	PeNAC021	829	852	-	35.8281	1.4e-12	2e-08	GAGAGAGAGAGAGAGAGAGGGGAA
AT2G01930	BPC1	BBR-BPC	PeNAC057	226	249	-	35.2969	1.98e-12	2.4e-08	GGGAGAGAGAGAGAGAGAGATAGA
AT2G01930	BPC1	BBR-BPC	PeNAC058	529	552	-	35.2969	1.98e-12	2.4e-08	GGGAGAGAGAGAGAGAGAGATAGA
AT4G38910	BPC5	BBR-BPC	PeNAC021	828	857	-	24.3291	2.05e-12	2.8e-08	GAAGAGAGAGAGAGAGAGAGAGAGGGGAAG
AT2G01930	BPC1	BBR-BPC	PeNAC046	60	83	-	35.0781	2.3e-12	2.7e-08	AAAAGAGAGAGAGAGAGAGAGAGA
AT4G38910	BPC5	BBR-BPC	PeNAC057	217	246	-	23.962	2.4e-12	2.9e-08	AGAGAGAGAGAGAGAGATAGAGAGAATAAG
AT4G38910	BPC5	BBR-BPC	PeNAC058	520	549	-	23.962	2.4e-12	2.9e-08	AGAGAGAGAGAGAGAGATAGAGAGAATAAG
AT2G01930	BPC1	BBR-BPC	PeNAC007	864	887	-	34.4531	3.52e-12	3.8e-08	GAGAGAGAGAGAGAGAGAAGGACA
AT2G01930	BPC1	BBR-BPC	PeNAC007	858	881	-	33.8906	5.23e-12	5.1e-08	GAGAGAGAGAGAAGGACAGAGAGA
AT2G01930	BPC1	BBR-BPC	PeNAC008	864	887	-	33.8906	5.23e-12	5.1e-08	GAGAGAGAGAGAAGGACAGAGAGA
AT4G38910	BPC5	BBR-BPC	PeNAC057	219	248	-	21.6329	5.36e-12	5.8e-08	GGAGAGAGAGAGAGAGAGATAGAGAGAATA
AT4G38910	BPC5	BBR-BPC	PeNAC058	522	551	-	21.6329	5.36e-12	5.8e-08	GGAGAGAGAGAGAGAGAGATAGAGAGAATA
AT2G40340	DREB2C	ERF	PeNAC089	575	595	-	31.2794	7.52e-12	1.5e-06	GGTGGTGGTGGTGGTGGTGGT
AT4G38910	BPC5	BBR-BPC	PeNAC057	221	250	-	20.4304	7.62e-12	7.4e-08	TGGGAGAGAGAGAGAGAGAGATAGAGAGAA
AT4G38910	BPC5	BBR-BPC	PeNAC058	524	553	-	20.4304	7.62e-12	7.4e-08	TGGGAGAGAGAGAGAGAGAGATAGAGAGAA
AT2G01930	BPC1	BBR-BPC	PeNAC048	31	54	+	33.2812	8.09e-12	7.5e-08	gagagagggagagaaggagagagc
AT2G01930	BPC1	BBR-BPC	PeNAC057	228	251	-	32.9062	1.06e-11	9e-08	GTGGGAGAGAGAGAGAGAGAGATA
AT2G01930	BPC1	BBR-BPC	PeNAC058	531	554	-	32.9062	1.06e-11	9e-08	GTGGGAGAGAGAGAGAGAGAGATA
AT4G38910	BPC5	BBR-BPC	PeNAC057	223	252	-	19.0127	1.22e-11	1.1e-07	TGTGGGAGAGAGAGAGAGAGAGATAGAGAG
AT4G38910	BPC5	BBR-BPC	PeNAC058	526	555	-	19.0127	1.22e-11	1.1e-07	TGTGGGAGAGAGAGAGAGAGAGATAGAGAG
AT4G38910	BPC5	BBR-BPC	PeNAC048	22	51	+	18.7848	1.31e-11	1.1e-07	aaagacacagagagagggagagaaggagag
AT5G42520	BPC6	BBR-BPC	PeNAC007	871	891	+	32.7671	1.36e-11	1.9e-07	ctctctctctctctctctcca
AT2G01930	BPC1	BBR-BPC	PeNAC057	220	243	-	32.3438	1.57e-11	1.2e-07	GAGAGAGAGAGAGATAGAGAGAAT
AT2G01930	BPC1	BBR-BPC	PeNAC058	523	546	-	32.3438	1.57e-11	1.2e-07	GAGAGAGAGAGAGATAGAGAGAAT
AT5G42520	BPC6	BBR-BPC	PeNAC022	295	315	+	32.4795	1.68e-11	2.2e-07	ctctctctctctctctctata
AT5G42520	BPC6	BBR-BPC	PeNAC023	743	763	+	32.3973	1.77e-11	2.2e-07	ctgtcgctctctctctctctc
AT5G42520	BPC6	BBR-BPC	PeNAC018	980	1000	+	32.3699	1.84e-11	2.2e-07	ctctctctctctctctctcaa
AT5G42520	BPC6	BBR-BPC	PeNAC007	867	887	+	32.2329	2.05e-11	2.3e-07	ccttctctctctctctctctc
AT2G01930	BPC1	BBR-BPC	PeNAC021	827	850	-	31.7656	2.3e-11	1.7e-07	GAGAGAGAGAGAGAGAGGGGAAGG
AT5G42520	BPC6	BBR-BPC	PeNAC021	830	850	+	31.7808	2.65e-11	2.8e-07	tcccctctctctctctctctc
AT2G01930	BPC1	BBR-BPC	PeNAC007	862	885	-	31.4688	2.79e-11	2e-07	GAGAGAGAGAGAGAGAAGGACAGA
AT5G42520	BPC6	BBR-BPC	PeNAC046	63	83	+	31.6301	3.04e-11	2.9e-07	ctctctctctctctctctttt
AT5G42520	BPC6	BBR-BPC	PeNAC057	229	249	+	31.5753	3.2e-11	2.9e-07	atctctctctctctctctccc
AT5G42520	BPC6	BBR-BPC	PeNAC058	532	552	+	31.5753	3.2e-11	2.9e-07	atctctctctctctctctccc
AT2G01930	BPC1	BBR-BPC	PeNAC007	860	883	-	31.2188	3.26e-11	2.2e-07	GAGAGAGAGAGAGAAGGACAGAGA
AT2G01930	BPC1	BBR-BPC	PeNAC008	866	889	-	31.2188	3.26e-11	2.2e-07	GAGAGAGAGAGAGAAGGACAGAGA
AT4G38910	BPC5	BBR-BPC	PeNAC023	745	774	-	15.6835	3.63e-11	2.9e-07	CACGAGAGAGAGAGAGAGAGAGAGAGCGAC
AT1G69570	CDF5	Dof	PeNAC083	494	520	-	24.1406	4.16e-11	8.3e-06	TTTTTTCTTTTTCTTTTTCTTTTTTTT
AT4G38910	BPC5	BBR-BPC	PeNAC021	824	853	-	15.1013	4.36e-11	3.4e-07	AGAGAGAGAGAGAGAGAGAGGGGAAGGGCA
AT5G42520	BPC6	BBR-BPC	PeNAC023	753	773	+	30.9315	4.7e-11	4.1e-07	ctctctctctctctctctcgt
AT5G42520	BPC6	BBR-BPC	PeNAC057	231	251	+	30.7808	5.17e-11	4.1e-07	ctctctctctctctctcccac
AT5G42520	BPC6	BBR-BPC	PeNAC058	534	554	+	30.7808	5.17e-11	4.1e-07	ctctctctctctctctcccac
AT2G01930	BPC1	BBR-BPC	PeNAC007	868	891	-	30.2031	6.11e-11	4e-07	TGGAGAGAGAGAGAGAGAGAGAAG
AT5G25390	SHN3	ERF	PeNAC089	575	595	+	30.2609	6.12e-11	1.2e-05	accaccaccaccaccaccacc
AT5G42520	BPC6	BBR-BPC	PeNAC023	745	765	+	30.4658	6.3e-11	4.7e-07	gtcgctctctctctctctctc
AT5G42520	BPC6	BBR-BPC	PeNAC074	557	577	+	30.3973	6.58e-11	4.7e-07	ttctctctctctctctctctg
AT5G42520	BPC6	BBR-BPC	PeNAC074	538	558	+	30.3836	6.61e-11	4.7e-07	gtctctctctctctctctctt
AT4G38000	DOF4.7	Dof	PeNAC083	496	523	-	23.0625	6.65e-11	1.3e-05	TCTTTTTTTCTTTTTCTTTTTCTTTTTT
AT3G24050	GATA1	GATA	PeNAC089	577	591	-	23.3529	7.13e-11	7.3e-06	GTGGTGGTGGTGGTG
AT3G24050	GATA1	GATA	PeNAC089	580	594	-	23.3529	7.13e-11	7.3e-06	GTGGTGGTGGTGGTG
AT5G42520	BPC6	BBR-BPC	PeNAC074	536	556	+	30.2329	7.44e-11	5.1e-07	tagtctctctctctctctctc
AT2G01930	BPC1	BBR-BPC	PeNAC021	835	858	-	29.8125	7.77e-11	4.8e-07	TGAAGAGAGAGAGAGAGAGAGAGA
AT2G01930	BPC1	BBR-BPC	PeNAC046	54	77	-	29.7969	7.84e-11	4.8e-07	GAGAGAGAGAGAGAGAGAGTGCAG
AT4G38910	BPC5	BBR-BPC	PeNAC023	749	778	-	13.038	7.94e-11	5.9e-07	CAAGCACGAGAGAGAGAGAGAGAGAGAGAG
AT2G01930	BPC1	BBR-BPC	PeNAC074	535	558	-	29.6094	8.79e-11	5.2e-07	AAGAGAGAGAGAGAGAGAGACTAA
AT4G38910	BPC5	BBR-BPC	PeNAC058	528	557	-	12.3544	9.87e-11	7.1e-07	ATTGTGGGAGAGAGAGAGAGAGAGATAGAG
AT4G38910	BPC5	BBR-BPC	PeNAC058	530	559	-	11.519	1.29e-10	9e-07	GTATTGTGGGAGAGAGAGAGAGAGAGATAG
AT2G01930	BPC1	BBR-BPC	PeNAC021	825	848	-	28.7812	1.47e-10	8.5e-07	GAGAGAGAGAGAGAGGGGAAGGGC
AT5G42520	BPC6	BBR-BPC	PeNAC074	555	575	+	29	1.61e-10	1.1e-06	tcttctctctctctctctctc
AT5G42520	BPC6	BBR-BPC	PeNAC057	221	241	+	28.9041	1.71e-10	1.1e-06	ttctctctatctctctctctc
AT5G42520	BPC6	BBR-BPC	PeNAC058	524	544	+	28.9041	1.71e-10	1.1e-06	ttctctctatctctctctctc
AT2G40340	DREB2C	ERF	PeNAC089	578	598	-	28.0441	1.84e-10	1.4e-05	GATGGTGGTGGTGGTGGTGGT
AT1G51600	GATA28	GATA	PeNAC021	426	444	-	28.8493	1.87e-10	3.8e-05	CATCATCATCATCATCATA
AT2G01930	BPC1	BBR-BPC	PeNAC021	837	860	-	28.375	1.89e-10	1e-06	CATGAAGAGAGAGAGAGAGAGAGA
AT2G01930	BPC1	BBR-BPC	PeNAC018	975	998	-	28.3594	1.91e-10	1e-06	GAGAGAGAGAGAGAGAGAGCAGAG
AT2G01930	BPC1	BBR-BPC	PeNAC057	218	241	-	28.2812	2e-10	1e-06	GAGAGAGAGAGATAGAGAGAATAA
AT2G01930	BPC1	BBR-BPC	PeNAC058	521	544	-	28.2812	2e-10	1e-06	GAGAGAGAGAGATAGAGAGAATAA
AT2G40340	DREB2C	ERF	PeNAC089	581	601	-	27.9118	2.07e-10	1.4e-05	GGTGATGGTGGTGGTGGTGGT
AT3G24050	GATA1	GATA	PeNAC089	583	597	-	23.25	2.13e-10	1.5e-05	ATGGTGGTGGTGGTG
AT2G01930	BPC1	BBR-BPC	PeNAC074	554	577	-	28.1406	2.18e-10	1.1e-06	CAGAGAGAGAGAGAGAGAGAAGAG
AT4G38910	BPC5	BBR-BPC	PeNAC084	255	284	-	9.72152	2.21e-10	1.4e-06	ATATATAGAAAAAGAGAGAGAGTGAGAGAG
AT2G01930	BPC1	BBR-BPC	PeNAC057	230	253	-	28.0625	2.29e-10	1.1e-06	TTGTGGGAGAGAGAGAGAGAGAGA
AT2G01930	BPC1	BBR-BPC	PeNAC058	533	556	-	28.0625	2.29e-10	1.1e-06	TTGTGGGAGAGAGAGAGAGAGAGA
AT4G38910	BPC5	BBR-BPC	PeNAC057	225	254	-	9.58228	2.32e-10	1.4e-06	GTTGTGGGAGAGAGAGAGAGAGAGATAGAG
AT5G42520	BPC6	BBR-BPC	PeNAC023	747	767	+	28.3973	2.34e-10	1.4e-06	cgctctctctctctctctctc
AT4G38910	BPC5	BBR-BPC	PeNAC057	215	244	-	9.50633	2.36e-10	1.4e-06	AGAGAGAGAGAGAGATAGAGAGAATAAGGT
AT4G38910	BPC5	BBR-BPC	PeNAC058	518	547	-	9.50633	2.36e-10	1.4e-06	AGAGAGAGAGAGAGATAGAGAGAATAAGGT
AT4G38910	BPC5	BBR-BPC	PeNAC007	863	892	-	9.39241	2.43e-10	1.4e-06	CTGGAGAGAGAGAGAGAGAGAGAAGGACAG
AT4G38910	BPC5	BBR-BPC	PeNAC023	737	766	-	9.03797	2.67e-10	1.5e-06	AGAGAGAGAGAGAGAGAGCGACAGGGAAGT
AT5G42520	BPC6	BBR-BPC	PeNAC025	706	726	+	28.0685	2.92e-10	1.7e-06	caatctctctctctctatctc
AT5G49300	GATA16	GATA	PeNAC021	427	453	-	27.4828	2.99e-10	6.1e-05	GATGTAAATCATCATCATCATCATCAT
AT4G38910	BPC5	BBR-BPC	PeNAC021	832	861	-	8.63291	3.01e-10	1.7e-06	GCATGAAGAGAGAGAGAGAGAGAGAGAGGG
AT2G45660	SOC1	MIKC_MADS	PeNAC046	60	80	+	20.5217	3.08e-10	1.5e-05	tctctctctctctctctctct
AT2G45660	SOC1	MIKC_MADS	PeNAC023	750	770	+	20.5217	3.08e-10	1.5e-05	tctctctctctctctctctct
AT2G45660	SOC1	MIKC_MADS	PeNAC021	835	855	+	20.5217	3.08e-10	1.5e-05	tctctctctctctctctctct
AT5G42520	BPC6	BBR-BPC	PeNAC021	838	858	+	27.9589	3.13e-10	1.8e-06	ctctctctctctctctcttca
AT1G71450	ERF021	ERF	PeNAC089	577	596	+	26.6094	3.13e-10	6.2e-05	caccaccaccaccaccacca
AT5G66940	DOF5.8	Dof	PeNAC083	496	524	-	21.7656	3.14e-10	4.8e-05	CTCTTTTTTTCTTTTTCTTTTTCTTTTTT
AT3G06740	GATA15	GATA	PeNAC021	426	444	-	27.7391	3.32e-10	6.8e-05	CATCATCATCATCATCATA
AT2G01930	BPC1	BBR-BPC	PeNAC074	556	579	-	27.375	3.42e-10	1.6e-06	AGCAGAGAGAGAGAGAGAGAGAAG
AT2G01930	BPC1	BBR-BPC	PeNAC007	870	893	-	27.375	3.42e-10	1.6e-06	ACTGGAGAGAGAGAGAGAGAGAGA
AT1G20640	NLP4	Nin-like	PeNAC066	977	991	+	20.8235	3.43e-10	3.4e-05	gcagcagcagcagca
AT1G20640	NLP4	Nin-like	PeNAC066	980	994	+	20.8235	3.43e-10	3.4e-05	gcagcagcagcagca
AT5G42520	BPC6	BBR-BPC	PeNAC023	741	761	+	27.7397	3.5e-10	1.9e-06	ccctgtcgctctctctctctc
AT5G42520	BPC6	BBR-BPC	PeNAC022	297	317	+	27.6849	3.63e-10	2e-06	ctctctctctctctctatata
AT4G38910	BPC5	BBR-BPC	PeNAC048	20	49	+	7.88608	3.64e-10	1.9e-06	gaaaagacacagagagagggagagaaggag
AT4G38910	BPC5	BBR-BPC	PeNAC046	53	82	-	7.86076	3.66e-10	1.9e-06	AAAGAGAGAGAGAGAGAGAGAGAGTGCAGA
AT5G42520	BPC6	BBR-BPC	PeNAC007	865	885	+	27.589	3.84e-10	2e-06	gtccttctctctctctctctc
AT3G55370	OBP3	Dof	PeNAC094	356	376	+	20.9062	3.88e-10	3.9e-05	ttttctttttctctttttttt
AT3G55370	OBP3	Dof	PeNAC083	492	512	-	20.9062	3.88e-10	3.9e-05	TTTTCTTTTTCTTTTTTTTTT
AT2G01930	BPC1	BBR-BPC	PeNAC084	256	279	-	27.1406	3.93e-10	1.7e-06	TAGAAAAAGAGAGAGAGTGAGAGA
AT2G45660	SOC1	MIKC_MADS	PeNAC074	556	576	+	20.4493	3.97e-10	1.5e-05	cttctctctctctctctctct
AT2G45660	SOC1	MIKC_MADS	PeNAC007	868	888	+	20.4493	3.97e-10	1.5e-05	cttctctctctctctctctct
AT4G38910	BPC5	BBR-BPC	PeNAC023	751	780	-	7.40506	4.18e-10	2.1e-06	AGCAAGCACGAGAGAGAGAGAGAGAGAGAG
AT5G42520	BPC6	BBR-BPC	PeNAC007	863	883	+	27.4247	4.24e-10	2.1e-06	ctgtccttctctctctctctc
AT5G42520	BPC6	BBR-BPC	PeNAC008	869	889	+	27.4247	4.24e-10	2.1e-06	ctgtccttctctctctctctc
AT4G38910	BPC5	BBR-BPC	PeNAC044	940	969	-	7.34177	4.25e-10	2.1e-06	GGAGAATGAGAGAGAGGGAGAGGGAGCCAA
AT4G38910	BPC5	BBR-BPC	PeNAC046	51	80	-	7.27848	4.31e-10	2.1e-06	AGAGAGAGAGAGAGAGAGAGAGTGCAGAAA
AT5G42520	BPC6	BBR-BPC	PeNAC057	223	243	+	27.3288	4.46e-10	2.1e-06	ctctctatctctctctctctc
AT5G42520	BPC6	BBR-BPC	PeNAC058	526	546	+	27.3288	4.46e-10	2.1e-06	ctctctatctctctctctctc
AT2G01930	BPC1	BBR-BPC	PeNAC025	707	730	-	26.8438	4.66e-10	2e-06	GACAGAGATAGAGAGAGAGAGATT
AT5G42520	BPC6	BBR-BPC	PeNAC087	614	634	-	27.1918	4.85e-10	2.3e-06	CCCTCTCTCTCTCTCTCACTG
AT4G38910	BPC5	BBR-BPC	PeNAC048	24	53	+	6.39241	5.58e-10	2.7e-06	agacacagagagagggagagaaggagagag
AT2G01930	BPC1	BBR-BPC	PeNAC048	25	48	+	26.5	5.66e-10	2.4e-06	gacacagagagagggagagaagga
AT2G01930	BPC1	BBR-BPC	PeNAC074	533	556	-	26.4688	5.76e-10	2.4e-06	GAGAGAGAGAGAGAGAGACTAAGG
AT5G42520	BPC6	BBR-BPC	PeNAC007	861	881	+	26.863	5.88e-10	2.6e-06	ctctgtccttctctctctctc
AT5G42520	BPC6	BBR-BPC	PeNAC008	867	887	+	26.863	5.88e-10	2.6e-06	ctctgtccttctctctctctc
AT2G01930	BPC1	BBR-BPC	PeNAC094	413	436	-	26.3594	6.12e-10	2.5e-06	GGGAGAGGGAGAGAGAGTGGAGGA
AT4G38910	BPC5	BBR-BPC	PeNAC025	708	737	-	5.81013	6.57e-10	3e-06	AGAATTGGACAGAGATAGAGAGAGAGAGAT
AT2G01930	BPC1	BBR-BPC	PeNAC074	552	575	-	26.2188	6.63e-10	2.6e-06	GAGAGAGAGAGAGAGAGAAGAGAG
AT4G38910	BPC5	BBR-BPC	PeNAC008	863	892	-	5.78481	6.64e-10	3e-06	CTGGAGAGAGAGAGAGAAGGACAGAGAGAG
AT2G01930	BPC1	BBR-BPC	PeNAC046	52	75	-	26.2031	6.68e-10	2.6e-06	GAGAGAGAGAGAGAGAGTGCAGAA
AT4G38910	BPC5	BBR-BPC	PeNAC008	865	894	-	5.64557	6.98e-10	3.1e-06	AACTGGAGAGAGAGAGAGAAGGACAGAGAG
AT5G25390	SHN3	ERF	PeNAC089	578	598	+	26.8841	7e-10	6.9e-05	accaccaccaccaccaccatc
AT4G38000	DOF4.7	Dof	PeNAC094	356	383	+	21.8125	7.08e-10	7e-05	ttttctttttctcttttttttctttttg
AT4G38910	BPC5	BBR-BPC	PeNAC022	293	322	-	5.56962	7.1e-10	3.1e-06	ATATATATATAGAGAGAGAGAGAGAGAGCA
AT2G01930	BPC1	BBR-BPC	PeNAC046	62	85	-	26.0781	7.17e-10	2.7e-06	TGAAAAGAGAGAGAGAGAGAGAGA
AT2G45660	SOC1	MIKC_MADS	PeNAC021	833	853	+	20.3043	7.18e-10	2.3e-05	cctctctctctctctctctct
AT5G66940	DOF5.8	Dof	PeNAC094	352	380	+	21.3594	7.24e-10	4.8e-05	cctcttttctttttctcttttttttcttt
AT5G66940	DOF5.8	Dof	PeNAC083	490	518	-	21.3594	7.24e-10	4.8e-05	TTTTCTTTTTCTTTTTCTTTTTTTTTTTA
AT5G42520	BPC6	BBR-BPC	PeNAC074	534	554	+	26.4795	7.29e-10	3.2e-06	cttagtctctctctctctctc
AT2G01930	BPC1	BBR-BPC	PeNAC048	33	56	+	26.0469	7.3e-10	2.7e-06	gagagggagagaaggagagagccg
AT4G38910	BPC5	BBR-BPC	PeNAC023	753	782	-	5.35443	7.56e-10	3.2e-06	AAAGCAAGCACGAGAGAGAGAGAGAGAGAG
AT5G42520	BPC6	BBR-BPC	PeNAC048	33	53	-	26.274	8.15e-10	3.5e-06	CTCTCTCCTTCTCTCCCTCTC
AT2G01930	BPC1	BBR-BPC	PeNAC022	294	317	-	25.7344	8.7e-10	3.2e-06	TATATAGAGAGAGAGAGAGAGAGC
AT5G42520	BPC6	BBR-BPC	PeNAC074	540	560	+	26.1233	8.87e-10	3.7e-06	ctctctctctctctctcttct
AT2G45660	SOC1	MIKC_MADS	PeNAC046	62	82	+	20.2319	9.01e-10	2.5e-05	tctctctctctctctctcttt
AT2G01930	BPC1	BBR-BPC	PeNAC044	943	966	-	25.625	9.24e-10	3.3e-06	GAATGAGAGAGAGGGAGAGGGAGC
AT4G38910	BPC5	BBR-BPC	PeNAC058	532	561	-	4.59494	9.43e-10	3.9e-06	GGGTATTGTGGGAGAGAGAGAGAGAGAGAT
AT4G38910	BPC5	BBR-BPC	PeNAC084	253	282	-	4.50633	9.65e-10	3.9e-06	ATATAGAAAAAGAGAGAGAGTGAGAGAGAT
AT2G01930	BPC1	BBR-BPC	PeNAC007	854	877	-	25.5	9.9e-10	3.5e-06	GAGAGAGAAGGACAGAGAGAGGGA
AT2G01930	BPC1	BBR-BPC	PeNAC008	860	883	-	25.5	9.9e-10	3.5e-06	GAGAGAGAAGGACAGAGAGAGGGA
AT5G42520	BPC6	BBR-BPC	PeNAC021	826	846	+	25.8219	1.05e-09	4.3e-06	cccttcccctctctctctctc
AT3G24050	GATA1	GATA	PeNAC089	589	603	-	22.8824	1.05e-09	5.4e-05	ATGGTGATGGTGGTG
AT5G42520	BPC6	BBR-BPC	PeNAC044	967	987	+	25.6575	1.15e-09	4.6e-06	tcctctctctctctctccatc
AT5G42520	BPC6	BBR-BPC	PeNAC029	943	963	+	25.589	1.2e-09	4.7e-06	cccttgctttctctctctctc
AT1G69570	CDF5	Dof	PeNAC024	190	216	+	22.1406	1.23e-09	0.00012	ttttttcttttcttttttttttttttt
AT3G55370	OBP3	Dof	PeNAC024	197	217	+	20.4375	1.25e-09	8.3e-05	ttttctttttttttttttttt
AT1G51600	GATA28	GATA	PeNAC021	429	447	-	26.2466	1.26e-09	0.00013	AATCATCATCATCATCATC
AT3G02150	TCP13	TCP	PeNAC063	330	342	-	24.2329	1.28e-09	0.00026	GTGGGGACCACAG
AT2G01930	BPC1	BBR-BPC	PeNAC018	977	1000	-	24.9688	1.33e-09	4.6e-06	TTGAGAGAGAGAGAGAGAGAGCAG
AT5G42520	BPC6	BBR-BPC	PeNAC044	946	966	+	25.3973	1.33e-09	5.1e-06	ccctctccctctctctcattc
AT5G17430	BBM	AP2	PeNAC062	250	269	+	21.3418	1.35e-09	0.00015	aaggaagaaaagaagagaaa
AT5G42520	BPC6	BBR-BPC	PeNAC025	708	728	+	25.3562	1.36e-09	5.1e-06	atctctctctctctatctctg
AT5G42520	BPC6	BBR-BPC	PeNAC021	828	848	+	25.2466	1.44e-09	5.3e-06	cttcccctctctctctctctc
AT5G17430	BBM	AP2	PeNAC003	386	405	-	21.2911	1.47e-09	0.00015	AAAAAAAAAAAAGAGAGAGA
AT5G42520	BPC6	BBR-BPC	PeNAC084	255	275	+	25.1644	1.51e-09	5.4e-06	ctctctcactctctctctttt
AT5G42520	BPC6	BBR-BPC	PeNAC018	978	998	+	25.1644	1.51e-09	5.4e-06	tgctctctctctctctctctc
AT2G45660	SOC1	MIKC_MADS	PeNAC023	752	772	+	20.0725	1.52e-09	3.4e-05	tctctctctctctctctctcg
AT4G38910	BPC5	BBR-BPC	PeNAC022	295	324	-	2.79747	1.54e-09	6.1e-06	ATATATATATATAGAGAGAGAGAGAGAGAG
AT4G38910	BPC5	BBR-BPC	PeNAC087	615	644	+	2.72152	1.57e-09	6.1e-06	agtgagagagagagagaggggctatgaccg
AT4G38910	BPC5	BBR-BPC	PeNAC044	942	971	-	2.50633	1.64e-09	6.3e-06	GAGGAGAATGAGAGAGAGGGAGAGGGAGCC
AT2G01930	BPC1	BBR-BPC	PeNAC023	742	765	-	24.5469	1.68e-09	5.7e-06	GAGAGAGAGAGAGAGAGCGACAGG
AT5G42520	BPC6	BBR-BPC	PeNAC018	976	996	+	24.9726	1.68e-09	5.9e-06	tctgctctctctctctctctc
AT4G38910	BPC5	BBR-BPC	PeNAC021	830	859	-	2.26582	1.74e-09	6.5e-06	ATGAAGAGAGAGAGAGAGAGAGAGAGGGGA
AT5G42520	BPC6	BBR-BPC	PeNAC048	31	51	-	24.9041	1.75e-09	6e-06	CTCTCCTTCTCTCCCTCTCTC
AT2G45660	SOC1	MIKC_MADS	PeNAC074	856	876	+	20.029	1.76e-09	3.4e-05	tttttttttttttctctctct
AT2G01930	BPC1	BBR-BPC	PeNAC074	539	562	-	24.4531	1.77e-09	5.8e-06	AGAGAAGAGAGAGAGAGAGAGAGA
AT2G01930	BPC1	BBR-BPC	PeNAC048	29	52	+	24.4375	1.78e-09	5.8e-06	cagagagagggagagaaggagaga
AT1G71450	ERF021	ERF	PeNAC089	580	599	+	24.75	1.79e-09	0.00018	caccaccaccaccaccatca
AT4G38910	BPC5	BBR-BPC	PeNAC048	26	55	+	1.79747	1.98e-09	7.3e-06	acacagagagagggagagaaggagagagcc
AT2G45660	SOC1	MIKC_MADS	PeNAC083	497	517	-	19.9855	1.99e-09	3.4e-05	TTTCTTTTTCTTTTTCTTTTT
AT2G45660	SOC1	MIKC_MADS	PeNAC007	870	890	+	19.971	2.06e-09	3.4e-05	tctctctctctctctctctcc
AT5G42520	BPC6	BBR-BPC	PeNAC043	61	81	-	24.5616	2.1e-09	7.1e-06	TCATCTCTCTCTCTCTCCCTA
AT4G38000	DOF4.7	Dof	PeNAC039	927	954	+	21.1562	2.11e-09	0.00014	attttttttctttgttttctgctttttg
AT2G45660	SOC1	MIKC_MADS	PeNAC046	64	84	+	19.9565	2.14e-09	3.4e-05	tctctctctctctctcttttc
AT4G38910	BPC5	BBR-BPC	PeNAC007	865	894	-	1.4557	2.16e-09	7.8e-06	AACTGGAGAGAGAGAGAGAGAGAGAAGGAC
AT2G01930	BPC1	BBR-BPC	PeNAC074	537	560	-	24.0781	2.16e-09	6.9e-06	AGAAGAGAGAGAGAGAGAGAGACT
AT3G21175	GATA24	GATA	PeNAC021	428	442	-	27.6094	2.18e-09	0.00022	TCATCATCATCATCA
AT3G21175	GATA24	GATA	PeNAC021	431	445	-	27.6094	2.18e-09	0.00022	TCATCATCATCATCA
AT2G01930	BPC1	BBR-BPC	PeNAC022	290	313	-	23.9844	2.28e-09	7.2e-06	TAGAGAGAGAGAGAGAGAGCATTA
AT2G40340	DREB2C	ERF	PeNAC089	584	604	-	25.0735	2.28e-09	0.00011	GATGGTGATGGTGGTGGTGGT
AT3G06740	GATA15	GATA	PeNAC021	429	447	-	25.2464	2.32e-09	0.00024	AATCATCATCATCATCATC
AT1G67260	TCP1	TCP	PeNAC094	801	830	+	25.1899	2.42e-09	0.00042	agtgggcccccactcacccaacagtaagac
AT5G42520	BPC6	BBR-BPC	PeNAC007	859	879	+	24.1644	2.61e-09	8.5e-06	ctctctgtccttctctctctc
AT5G42520	BPC6	BBR-BPC	PeNAC008	865	885	+	24.1644	2.61e-09	8.5e-06	ctctctgtccttctctctctc
AT5G17430	BBM	AP2	PeNAC061	453	472	-	21.0759	2.63e-09	0.00015	GAGAAAGAGAAGAAGAGAAG
AT5G25390	SHN3	ERF	PeNAC089	581	601	+	24.8841	2.64e-09	0.00017	accaccaccaccaccatcacc
AT5G42520	BPC6	BBR-BPC	PeNAC084	257	277	+	24.1096	2.68e-09	8.6e-06	ctctcactctctctctttttc
AT5G42520	BPC6	BBR-BPC	PeNAC043	59	79	-	24.0959	2.71e-09	8.6e-06	ATCTCTCTCTCTCTCCCTATA
AT4G38910	BPC5	BBR-BPC	PeNAC007	869	898	-	0.544304	2.73e-09	9.6e-06	AAGTAACTGGAGAGAGAGAGAGAGAGAGAA
AT4G38910	BPC5	BBR-BPC	PeNAC046	49	78	-	0.493671	2.78e-09	9.6e-06	AGAGAGAGAGAGAGAGAGAGTGCAGAAAAT
AT2G01930	BPC1	BBR-BPC	PeNAC044	964	987	-	23.5781	2.84e-09	8.8e-06	GATGGAGAGAGAGAGAGAGGAGAA
AT5G42520	BPC6	BBR-BPC	PeNAC015	872	892	+	24	2.85e-09	8.9e-06	atcacactctctctatctctc
AT5G17430	BBM	AP2	PeNAC024	183	202	-	21.0127	2.94e-09	0.00015	AGAAAAGAAAAAAAGAGAGA
AT4G38910	BPC5	BBR-BPC	PeNAC048	30	59	+	0.240506	2.96e-09	1e-05	agagagagggagagaaggagagagccgcca
AT1G72050	TFIIIA	C2H2	PeNAC023	145	163	+	24.3782	2.97e-09	0.00057	ctaccctctcctcctcctc
AT1G77920	TGA7	bZIP	PeNAC002	228	244	+	22.7344	3.09e-09	0.00064	tgatgacgtcatccttc
AT2G01930	BPC1	BBR-BPC	PeNAC022	296	319	-	23.3906	3.14e-09	9.5e-06	TATATATAGAGAGAGAGAGAGAGA
AT2G01930	BPC1	BBR-BPC	PeNAC021	823	846	-	23.3594	3.19e-09	9.5e-06	GAGAGAGAGAGAGGGGAAGGGCAG
AT2G01930	BPC1	BBR-BPC	PeNAC022	292	315	-	23.3438	3.21e-09	9.5e-06	TATAGAGAGAGAGAGAGAGAGCAT
AT4G38910	BPC5	BBR-BPC	PeNAC057	227	256	-	-0.06329	3.24e-09	1.1e-05	GTGTTGTGGGAGAGAGAGAGAGAGAGATAG
AT4G38910	BPC5	BBR-BPC	PeNAC046	57	86	-	-0.10127	3.28e-09	1.1e-05	CTGAAAAGAGAGAGAGAGAGAGAGAGAGTG
AT4G38000	DOF4.7	Dof	PeNAC094	273	300	-	20.875	3.28e-09	0.00016	TTTTTTTCCTTTTTTTTTTTGCTTTTCG
AT1G69570	CDF5	Dof	PeNAC083	488	514	-	21.4531	3.36e-09	0.00021	CTTTTTCTTTTTCTTTTTTTTTTTAAT
AT5G42520	BPC6	BBR-BPC	PeNAC022	291	311	+	23.6712	3.39e-09	1e-05	aatgctctctctctctctctc
AT1G18960	AT1G18960	MYB_related	PeNAC089	580	601	+	19.6986	3.54e-09	0.00071	caccaccaccaccaccatcacc
AT2G40340	DREB2C	ERF	PeNAC089	572	592	-	24.4559	3.71e-09	0.00015	GGTGGTGGTGGTGGTGGTTAC
AT5G66940	DOF5.8	Dof	PeNAC061	631	659	+	20.4688	3.74e-09	0.00019	tgttttcttcttttttctttttttttttc
AT2G01930	BPC1	BBR-BPC	PeNAC084	252	275	-	23.0312	3.79e-09	1.1e-05	AAAAGAGAGAGAGTGAGAGAGATT
AT5G42520	BPC6	BBR-BPC	PeNAC102	823	843	+	23.4384	3.84e-09	1.2e-05	tcctctctctctctctattta
AT2G01930	BPC1	BBR-BPC	PeNAC044	945	968	-	22.9844	3.88e-09	1.1e-05	GAGAATGAGAGAGAGGGAGAGGGA
AT5G17430	BBM	AP2	PeNAC074	543	562	-	20.8608	3.94e-09	0.00016	AGAGAAGAGAGAGAGAGAGA
AT2G01930	BPC1	BBR-BPC	PeNAC044	968	991	-	22.9531	3.95e-09	1.1e-05	GGCGGATGGAGAGAGAGAGAGAGG
AT2G45660	SOC1	MIKC_MADS	PeNAC072	853	873	+	19.7391	4.04e-09	5.6e-05	ttcctttttttttctctctct
AT2G01930	BPC1	BBR-BPC	PeNAC048	23	46	+	22.8906	4.08e-09	1.1e-05	aagacacagagagagggagagaag
AT2G01930	BPC1	BBR-BPC	PeNAC087	614	637	+	22.875	4.11e-09	1.1e-05	cagtgagagagagagagaggggct
AT2G01930	BPC1	BBR-BPC	PeNAC048	27	50	+	22.8594	4.15e-09	1.1e-05	cacagagagagggagagaaggaga
AT2G01930	BPC1	BBR-BPC	PeNAC008	868	891	-	22.8594	4.15e-09	1.1e-05	TGGAGAGAGAGAGAGAAGGACAGA
AT2G45660	SOC1	MIKC_MADS	PeNAC094	355	375	+	19.7246	4.19e-09	5.6e-05	cttttctttttctcttttttt
AT1G69570	CDF5	Dof	PeNAC094	354	380	+	21.2812	4.28e-09	0.00021	tcttttctttttctcttttttttcttt
AT1G71450	ERF021	ERF	PeNAC089	574	593	+	23.75	4.29e-09	0.00028	aaccaccaccaccaccacca
AT4G38910	BPC5	BBR-BPC	PeNAC046	59	88	-	-1.16456	4.38e-09	1.4e-05	ATCTGAAAAGAGAGAGAGAGAGAGAGAGAG
AT4G38910	BPC5	BBR-BPC	PeNAC025	710	739	-	-1.25316	4.49e-09	1.4e-05	ACAGAATTGGACAGAGATAGAGAGAGAGAG
AT2G45660	SOC1	MIKC_MADS	PeNAC074	539	559	+	19.6812	4.65e-09	5.6e-05	tctctctctctctctctcttc
AT2G45660	SOC1	MIKC_MADS	PeNAC021	837	857	+	19.6812	4.65e-09	5.6e-05	tctctctctctctctctcttc
AT5G42520	BPC6	BBR-BPC	PeNAC087	616	636	-	23.0548	4.69e-09	1.4e-05	GCCCCTCTCTCTCTCTCTCAC
AT5G42520	BPC6	BBR-BPC	PeNAC057	233	253	+	23.0137	4.78e-09	1.4e-05	ctctctctctctctcccacaa
AT5G42520	BPC6	BBR-BPC	PeNAC058	536	556	+	23.0137	4.78e-09	1.4e-05	ctctctctctctctcccacaa
AT5G02460	DOF5.1	Dof	PeNAC024	187	207	-	19.6719	5.06e-09	0.00057	AAAAAAGAAAAGAAAAAAAGA
AT5G42520	BPC6	BBR-BPC	PeNAC022	293	313	+	22.8904	5.09e-09	1.4e-05	tgctctctctctctctctcta
AT4G38910	BPC5	BBR-BPC	PeNAC084	257	286	-	-1.77215	5.11e-09	1.6e-05	TAATATATAGAAAAAGAGAGAGAGTGAGAG
AT5G42520	BPC6	BBR-BPC	PeNAC084	251	271	+	22.8767	5.12e-09	1.4e-05	aaatctctctcactctctctc
AT5G42520	BPC6	BBR-BPC	PeNAC022	299	319	+	22.8767	5.12e-09	1.4e-05	ctctctctctctctatatata
AT3G50410	DOF3.4	Dof	PeNAC094	274	294	-	18.0781	5.16e-09	0.00103	TCCTTTTTTTTTTTGCTTTTC
AT5G42520	BPC6	BBR-BPC	PeNAC044	948	968	+	22.8219	5.27e-09	1.4e-05	ctctccctctctctcattctc
AT4G38910	BPC5	BBR-BPC	PeNAC046	63	92	-	-1.89873	5.35e-09	1.7e-05	AAATATCTGAAAAGAGAGAGAGAGAGAGAG
AT5G66940	DOF5.8	Dof	PeNAC039	932	960	+	20.2188	5.69e-09	0.00023	ttttctttgttttctgctttttggatttt
AT1G53230	TCP3	TCP	PeNAC101	665	677	-	21.0781	5.74e-09	0.00074	GTGGGGACCACAT
AT1G69570	CDF5	Dof	PeNAC065	201	227	+	21.0625	5.78e-09	0.00023	tttgctctttttttttttgtttttctt
AT2G01930	BPC1	BBR-BPC	PeNAC044	947	970	-	22.2188	5.79e-09	1.5e-05	AGGAGAATGAGAGAGAGGGAGAGG
AT3G24050	GATA1	GATA	PeNAC089	586	600	-	22.1029	5.81e-09	0.00024	GTGATGGTGGTGGTG
AT4G38910	BPC5	BBR-BPC	PeNAC021	822	851	-	-2.25316	5.83e-09	1.8e-05	AGAGAGAGAGAGAGAGAGGGGAAGGGCAGG
AT2G45660	SOC1	MIKC_MADS	PeNAC061	634	654	+	19.5942	5.87e-09	6.6e-05	tttcttcttttttcttttttt
AT2G01930	BPC1	BBR-BPC	PeNAC025	705	728	-	22.125	6.07e-09	1.6e-05	CAGAGATAGAGAGAGAGAGATTGG
AT2G01930	BPC1	BBR-BPC	PeNAC025	709	732	-	22.125	6.07e-09	1.6e-05	TGGACAGAGATAGAGAGAGAGAGA
AT5G17430	BBM	AP2	PeNAC062	403	422	-	20.6456	6.08e-09	0.00017	AGAAAAGAAAGAAAGAGAGA
AT5G42520	BPC6	BBR-BPC	PeNAC084	259	279	+	22.4932	6.25e-09	1.7e-05	ctcactctctctctttttcta
AT3G02150	TCP13	TCP	PeNAC101	665	677	-	23.9178	6.35e-09	0.00063	GTGGGGACCACAT
AT5G17430	BBM	AP2	PeNAC072	555	574	-	20.6076	6.46e-09	0.00017	AGAGAAAAGAGAGAGAGAGA
AT2G01930	BPC1	BBR-BPC	PeNAC095	429	452	-	22	6.47e-09	1.6e-05	GGAAGGGAGAGAGGAAAAGAGAGA
AT1G72050	TFIIIA	C2H2	PeNAC063	901	919	+	23.395	6.71e-09	0.00065	tctccttctccttctcctc
AT4G38000	DOF4.7	Dof	PeNAC065	204	231	+	20.3906	6.79e-09	0.00027	gctctttttttttttgtttttctttttt
AT5G42520	BPC6	BBR-BPC	PeNAC015	385	405	-	22.2603	7.02e-09	1.9e-05	CCCACTCTCTCTCTCTATATA
AT1G08810	MYB60	MYB	PeNAC033	611	629	-	20.4219	7.24e-09	0.00148	CCTGTCCAACCACCTTCAC
AT2G28810	DOF2.2	Dof	PeNAC039	934	954	+	18.7656	7.57e-09	0.00152	ttctttgttttctgctttttg
AT5G42520	BPC6	BBR-BPC	PeNAC074	553	573	+	22.0959	7.61e-09	2e-05	tctcttctctctctctctctc
AT2G45660	SOC1	MIKC_MADS	PeNAC083	491	511	-	19.4928	7.65e-09	7.7e-05	TTTCTTTTTCTTTTTTTTTTT
AT2G01930	BPC1	BBR-BPC	PeNAC057	216	239	-	21.6719	7.65e-09	1.9e-05	GAGAGAGAGATAGAGAGAATAAGG
AT2G01930	BPC1	BBR-BPC	PeNAC058	519	542	-	21.6719	7.65e-09	1.9e-05	GAGAGAGAGATAGAGAGAATAAGG
AT1G53230	TCP3	TCP	PeNAC063	330	342	-	21.0625	7.66e-09	0.00074	GTGGGGACCACAG
AT5G17430	BBM	AP2	PeNAC078	79	98	-	20.5063	7.72e-09	0.00017	AAAAAAAAGAAAGAAAGAAA
AT1G20640	NLP4	Nin-like	PeNAC057	322	336	+	19.4559	7.81e-09	0.00039	acagcagcagcagca
AT1G20640	NLP4	Nin-like	PeNAC058	625	639	+	19.4559	7.81e-09	0.00039	acagcagcagcagca
AT2G01930	BPC1	BBR-BPC	PeNAC095	431	454	-	21.625	7.83e-09	1.9e-05	AAGGAAGGGAGAGAGGAAAAGAGA
AT3G20310	ERF7	ERF	PeNAC089	576	596	+	23.1875	7.84e-09	0.00157	ccaccaccaccaccaccacca
AT5G17430	BBM	AP2	PeNAC024	185	204	-	20.4937	7.86e-09	0.00017	AAAGAAAAGAAAAAAAGAGA
AT4G38910	BPC5	BBR-BPC	PeNAC074	557	586	-	-3.46835	7.87e-09	2.4e-05	AGGCATTAGCAGAGAGAGAGAGAGAGAGAA
AT2G45660	SOC1	MIKC_MADS	PeNAC034	698	718	+	19.4783	7.92e-09	7.7e-05	tttttttttttttttctttct
AT5G02460	DOF5.1	Dof	PeNAC061	633	653	-	19.4688	8.04e-09	0.00057	AAAAAAGAAAAAAGAAGAAAA
AT5G66940	DOF5.8	Dof	PeNAC102	237	265	-	19.9844	8.34e-09	0.00028	CCTCCTTTTCATTTTCCTTTTTCTTTTTA
AT2G45660	SOC1	MIKC_MADS	PeNAC023	748	768	+	19.4493	8.47e-09	7.7e-05	gctctctctctctctctctct
AT2G45660	SOC1	MIKC_MADS	PeNAC021	831	851	+	19.4493	8.47e-09	7.7e-05	cccctctctctctctctctct
AT3G55370	OBP3	Dof	PeNAC061	636	656	+	19.4844	8.72e-09	0.00036	tcttcttttttcttttttttt
AT4G38910	BPC5	BBR-BPC	PeNAC074	532	561	-	-3.93671	8.9e-09	2.6e-05	GAGAAGAGAGAGAGAGAGAGAGACTAAGGT
AT3G56850	DPBF3	bZIP	PeNAC014	733	747	-	22.7188	8.95e-09	0.0018	TGGGGACACGTGGCA
AT3G55370	OBP3	Dof	PeNAC024	192	212	+	19.4688	8.98e-09	0.00036	ttttcttttcttttttttttt
AT5G42520	BPC6	BBR-BPC	PeNAC022	289	309	+	21.7671	8.98e-09	2.3e-05	ttaatgctctctctctctctc
AT5G42520	BPC6	BBR-BPC	PeNAC046	55	75	+	21.7397	9.1e-09	2.3e-05	tgcactctctctctctctctc
AT4G38910	BPC5	BBR-BPC	PeNAC015	380	409	+	-4.05063	9.1e-09	2.6e-05	atatatatatagagagagagagtgggtgaa
AT2G01930	BPC1	BBR-BPC	PeNAC074	531	554	-	21.3125	9.18e-09	2.2e-05	GAGAGAGAGAGAGAGACTAAGGTT
AT5G08330	TCP21	TCP	PeNAC023	211	224	-	22.6094	9.23e-09	0.00181	GGTGGGCCCCGCCT
AT4G38910	BPC5	BBR-BPC	PeNAC087	613	642	+	-4.41772	9.87e-09	2.8e-05	acagtgagagagagagagaggggctatgac
AT2G45660	SOC1	MIKC_MADS	PeNAC024	183	203	+	19.3768	1e-08	8.7e-05	tctctctttttttcttttctt
AT5G42520	BPC6	BBR-BPC	PeNAC025	704	724	+	21.5479	1e-08	2.5e-05	tccaatctctctctctctatc
AT2G01930	BPC1	BBR-BPC	PeNAC023	740	763	-	21.125	1.01e-08	2.4e-05	GAGAGAGAGAGAGAGCGACAGGGA
AT4G27950	CRF4	ERF	PeNAC089	576	596	+	23.1765	1.03e-08	0.002	ccaccaccaccaccaccacca
AT3G58780	AGL1	MIKC_MADS	PeNAC051	211	228	-	18.7848	1.03e-08	0.00211	ATTGCCAAAATGGGAAAA
AT5G25390	SHN3	ERF	PeNAC089	572	592	+	22.6667	1.05e-08	0.00052	gtaaccaccaccaccaccacc
AT3G12250	TGA6	bZIP	PeNAC002	226	240	-	21.8438	1.05e-08	0.00217	GATGACGTCATCACC
AT4G38910	BPC5	BBR-BPC	PeNAC022	297	326	-	-4.74684	1.08e-08	3e-05	ATATATATATATATAGAGAGAGAGAGAGAG
AT5G66940	DOF5.8	Dof	PeNAC024	185	213	+	19.8125	1.09e-08	0.00031	tctctttttttcttttctttttttttttt
AT1G19210	ERF017	ERF	PeNAC101	671	684	-	20.7969	1.1e-08	0.00211	GTGGACGGTGGGGA
AT5G02460	DOF5.1	Dof	PeNAC022	688	708	-	19.3125	1.1e-08	0.00057	CAAAAAGAAAAGAAAAAAAAA
AT2G01930	BPC1	BBR-BPC	PeNAC021	839	862	-	20.8906	1.13e-08	2.7e-05	AGCATGAAGAGAGAGAGAGAGAGA
AT5G42520	BPC6	BBR-BPC	PeNAC007	873	893	+	21.274	1.14e-08	2.9e-05	ctctctctctctctctccagt
AT2G01930	BPC1	BBR-BPC	PeNAC084	254	277	-	20.8594	1.15e-08	2.7e-05	GAAAAAGAGAGAGAGTGAGAGAGA
AT5G42520	BPC6	BBR-BPC	PeNAC087	618	638	-	21.2466	1.16e-08	2.9e-05	TAGCCCCTCTCTCTCTCTCTC
AT1G53170	ERF8	ERF	PeNAC103	486	500	-	22.75	1.16e-08	0.00229	GCCTCCTCCGCCGTA
AT5G17430	BBM	AP2	PeNAC002	94	113	-	20.2785	1.18e-08	0.00021	AAAAAAAAAGAGGAGAGAAA
AT5G64060	anac103	NAC	PeNAC097	606	626	+	22.75	1.18e-08	0.0006	ggaaacttgggtcccaagttg
AT5G64060	anac103	NAC	PeNAC099	611	631	+	22.75	1.18e-08	0.0006	ggaaacttgggtcccaagttg
AT5G64060	anac103	NAC	PeNAC012	612	632	+	22.75	1.18e-08	0.0006	ggaaacttgggtcccaagttg
AT5G64060	anac103	NAC	PeNAC013	612	632	+	22.75	1.18e-08	0.0006	ggaaacttgggtcccaagttg
AT2G01930	BPC1	BBR-BPC	PeNAC084	258	281	-	20.8125	1.18e-08	2.7e-05	TATAGAAAAAGAGAGAGAGTGAGA
AT1G51700	DOF1.7	Dof	PeNAC083	497	517	+	17.7656	1.18e-08	0.00143	aaaaagaaaaagaaaaagaaa
AT5G42520	BPC6	BBR-BPC	PeNAC046	65	85	+	21.1781	1.2e-08	2.9e-05	ctctctctctctctcttttca
AT3G50410	DOF3.4	Dof	PeNAC039	933	953	+	17.7344	1.2e-08	0.0012	tttctttgttttctgcttttt
AT2G01930	BPC1	BBR-BPC	PeNAC044	939	962	-	20.75	1.22e-08	2.8e-05	GAGAGAGAGGGAGAGGGAGCCAAG
AT1G69570	CDF5	Dof	PeNAC024	195	221	+	20.5	1.22e-08	0.0004	tcttttctttttttttttttttttttg
AT5G42520	BPC6	BBR-BPC	PeNAC074	532	552	+	21.137	1.23e-08	2.9e-05	accttagtctctctctctctc
AT5G06839	TGA10	bZIP	PeNAC002	226	240	+	21.6875	1.26e-08	0.00261	ggtgatgacgtcatc
AT2G45660	SOC1	MIKC_MADS	PeNAC083	503	523	-	19.2754	1.27e-08	0.0001	TCTTTTTTTCTTTTTCTTTTT
AT2G45660	SOC1	MIKC_MADS	PeNAC074	541	561	+	19.2754	1.27e-08	0.0001	tctctctctctctctcttctc
AT5G17430	BBM	AP2	PeNAC094	357	376	-	20.2152	1.28e-08	0.00021	AAAAAAAAGAGAAAAAGAAA
AT1G21910	ERF012	ERF	PeNAC073	804	823	+	22.2812	1.29e-08	0.00253	ccacccgcaccatcaccgtc
AT5G42520	BPC6	BBR-BPC	PeNAC015	387	407	-	21.0274	1.29e-08	3.1e-05	CACCCACTCTCTCTCTCTATA
AT5G02460	DOF5.1	Dof	PeNAC083	502	522	+	19.2344	1.29e-08	0.00057	gaaaaagaaaaagaaaaaaag
AT1G03800	ERF10	ERF	PeNAC103	486	506	-	22.8438	1.31e-08	0.00253	CGCTACGCCTCCTCCGCCGTA
AT2G45660	SOC1	MIKC_MADS	PeNAC024	198	218	+	19.2609	1.31e-08	0.0001	tttcttttttttttttttttt
AT2G45660	SOC1	MIKC_MADS	PeNAC094	357	377	+	19.2464	1.36e-08	0.0001	tttctttttctcttttttttc
AT2G45660	SOC1	MIKC_MADS	PeNAC083	501	521	-	19.2319	1.4e-08	0.0001	TTTTTTTCTTTTTCTTTTTCT
AT5G02460	DOF5.1	Dof	PeNAC094	273	293	+	19.1875	1.42e-08	0.00057	cgaaaagcaaaaaaaaaaagg
AT4G38910	BPC5	BBR-BPC	PeNAC022	289	318	-	-5.88608	1.44e-08	4e-05	ATATATAGAGAGAGAGAGAGAGAGCATTAA
AT4G38910	BPC5	BBR-BPC	PeNAC084	249	278	-	-5.92405	1.45e-08	4e-05	AGAAAAAGAGAGAGAGTGAGAGAGATTTTA
AT3G55370	OBP3	Dof	PeNAC083	498	518	-	19.1719	1.5e-08	0.0005	TTTTCTTTTTCTTTTTCTTTT
AT1G72010	TCP22	TCP	PeNAC023	213	225	-	21.9375	1.51e-08	0.00293	AGGTGGGCCCCGC
AT5G17430	BBM	AP2	PeNAC024	198	217	-	20.1139	1.54e-08	0.00021	AAAAAAAAAAAAAAAAGAAA
AT5G42520	BPC6	BBR-BPC	PeNAC043	63	83	-	20.6438	1.55e-08	3.6e-05	CTTCATCTCTCTCTCTCTCCC
AT2G01930	BPC1	BBR-BPC	PeNAC043	61	84	+	20.2344	1.57e-08	3.5e-05	tagggagagagagagagatgaagg
AT1G34190	NAC017	NAC	PeNAC074	494	512	-	21.5781	1.61e-08	0.00138	AGGTTCCTTGGACGTCAAG
AT1G34190	NAC017	NAC	PeNAC072	510	528	-	21.5781	1.61e-08	0.00138	AGGTTCCTTGGACGTCAAG
AT5G17430	BBM	AP2	PeNAC046	62	81	-	20.0886	1.61e-08	0.00021	AAGAGAGAGAGAGAGAGAGA
AT5G17430	BBM	AP2	PeNAC074	539	558	-	20.0886	1.61e-08	0.00021	AAGAGAGAGAGAGAGAGAGA
AT5G17430	BBM	AP2	PeNAC021	837	856	-	20.0886	1.61e-08	0.00021	AAGAGAGAGAGAGAGAGAGA
AT4G38910	BPC5	BBR-BPC	PeNAC084	251	280	-	-6.41772	1.63e-08	4.4e-05	ATAGAAAAAGAGAGAGAGTGAGAGAGATTT
AT2G45660	SOC1	MIKC_MADS	PeNAC062	403	423	+	19.1594	1.64e-08	0.00011	tctctctttctttcttttctg
AT5G42520	BPC6	BBR-BPC	PeNAC084	253	273	+	20.5205	1.65e-08	3.8e-05	atctctctcactctctctctt
AT2G01930	BPC1	BBR-BPC	PeNAC074	560	583	-	20.0938	1.69e-08	3.7e-05	CATTAGCAGAGAGAGAGAGAGAGA
AT5G42520	BPC6	BBR-BPC	PeNAC044	944	964	+	20.4658	1.7e-08	3.9e-05	ctccctctccctctctctcat
AT1G75390	BZIP44	bZIP	PeNAC001	526	540	+	22.7344	1.7e-08	0.00349	catgatgacgtggca
AT5G25390	SHN3	ERF	PeNAC089	584	604	+	21.8551	1.7e-08	0.00067	accaccaccaccatcaccatc
AT5G17430	BBM	AP2	PeNAC078	83	102	-	20.038	1.72e-08	0.00021	AAAAAAAAAAAAGAAAGAAA
AT2G01930	BPC1	BBR-BPC	PeNAC044	966	989	-	20.0469	1.73e-08	3.8e-05	CGGATGGAGAGAGAGAGAGAGGAG
AT2G40340	DREB2C	ERF	PeNAC089	587	607	-	22.3824	1.73e-08	0.00058	CGAGATGGTGATGGTGGTGGT
AT2G01930	BPC1	BBR-BPC	PeNAC007	852	875	-	19.9688	1.79e-08	3.9e-05	GAGAGAAGGACAGAGAGAGGGATT
AT2G01930	BPC1	BBR-BPC	PeNAC008	858	881	-	19.9688	1.79e-08	3.9e-05	GAGAGAAGGACAGAGAGAGGGATT
AT2G45660	SOC1	MIKC_MADS	PeNAC083	493	513	-	19.1159	1.79e-08	0.00011	TTTTTCTTTTTCTTTTTTTTT
AT5G65210	TGA1	bZIP	PeNAC002	226	240	+	21.5469	1.8e-08	0.00371	ggtgatgacgtcatc
AT5G02460	DOF5.1	Dof	PeNAC083	496	516	+	19.0469	1.81e-08	0.00061	aaaaaagaaaaagaaaaagaa
AT1G69690	TCP15	TCP	PeNAC023	213	225	-	21.9688	1.82e-08	0.00356	AGGTGGGCCCCGC
AT5G17430	BBM	AP2	PeNAC034	348	367	+	20.0127	1.82e-08	0.00021	aataaaaaaagagagagagg
AT2G45660	SOC1	MIKC_MADS	PeNAC007	866	886	+	19.1014	1.85e-08	0.00011	tccttctctctctctctctct
AT4G38910	BPC5	BBR-BPC	PeNAC057	229	258	-	-6.96203	1.88e-08	5e-05	GGGTGTTGTGGGAGAGAGAGAGAGAGAGAT
AT1G51700	DOF1.7	Dof	PeNAC094	281	301	+	17.5625	1.9e-08	0.00143	aaaaaaaaaaaggaaaaaaaa
AT2G45660	SOC1	MIKC_MADS	PeNAC034	700	720	+	19.087	1.91e-08	0.00011	tttttttttttttctttctcg
AT5G17430	BBM	AP2	PeNAC083	500	519	+	19.962	1.95e-08	0.00021	aagaaaaagaaaaagaaaaa
AT1G18960	AT1G18960	MYB_related	PeNAC089	577	598	+	18.863	1.96e-08	0.00196	caccaccaccaccaccaccatc
AT5G66940	DOF5.8	Dof	PeNAC024	180	208	+	19.4219	1.98e-08	0.00049	atctctctctttttttcttttcttttttt
AT5G42520	BPC6	BBR-BPC	PeNAC046	53	73	+	20.1233	2e-08	4.5e-05	tctgcactctctctctctctc
AT2G45660	SOC1	MIKC_MADS	PeNAC074	852	872	+	19.058	2.03e-08	0.00011	cttctttttttttttttctct
AT2G45660	SOC1	MIKC_MADS	PeNAC074	854	874	+	19.058	2.03e-08	0.00011	tctttttttttttttctctct
AT4G34590	BZIP11	bZIP	PeNAC001	526	540	-	22.4062	2.06e-08	0.00417	TGCCACGTCATCATG
AT5G49300	GATA16	GATA	PeNAC089	580	606	+	18.7931	2.08e-08	0.00211	caccaccaccaccaccatcaccatctc
AT2G45660	SOC1	MIKC_MADS	PeNAC023	744	764	+	19.0435	2.09e-08	0.00011	tgtcgctctctctctctctct
AT2G45660	SOC1	MIKC_MADS	PeNAC021	829	849	+	19.0435	2.09e-08	0.00011	ttcccctctctctctctctct
AT3G62420	BZIP53	bZIP	PeNAC001	526	540	+	22.3438	2.11e-08	0.00425	catgatgacgtggca
AT2G45660	SOC1	MIKC_MADS	PeNAC074	554	574	+	19.029	2.16e-08	0.00012	ctcttctctctctctctctct
AT4G38000	DOF4.7	Dof	PeNAC024	180	207	+	19.5625	2.16e-08	0.00065	atctctctctttttttcttttctttttt
AT1G72050	TFIIIA	C2H2	PeNAC067	641	659	+	21.8739	2.17e-08	0.00139	cttcttccttcacctccac
AT5G42520	BPC6	BBR-BPC	PeNAC057	217	237	+	19.9315	2.19e-08	4.9e-05	cttattctctctatctctctc
AT5G42520	BPC6	BBR-BPC	PeNAC058	520	540	+	19.9315	2.19e-08	4.9e-05	cttattctctctatctctctc
AT5G25810	TINY	ERF	PeNAC016	325	339	+	19.9531	2.2e-08	0.00219	caccgccgacacagt
AT5G25810	TINY	ERF	PeNAC015	695	709	+	19.9531	2.2e-08	0.00219	caccgccgacacagt
AT2G01570	RGA	GRAS	PeNAC072	562	581	-	19.3571	2.21e-08	0.00122	CAGAGAGAGAGAAAAGAGAG
AT4G38910	BPC5	BBR-BPC	PeNAC082	895	924	+	-7.62025	2.22e-08	5.8e-05	agaaagagggaaggagagaggaaggctgag
AT1G69570	CDF5	Dof	PeNAC061	634	660	+	20.0156	2.25e-08	0.00061	tttcttcttttttctttttttttttct
AT5G42520	BPC6	BBR-BPC	PeNAC094	416	436	+	19.8493	2.28e-08	4.9e-05	tccactctctctccctctccc
AT5G42520	BPC6	BBR-BPC	PeNAC094	420	440	+	19.8493	2.28e-08	4.9e-05	ctctctctccctctcccattc
AT4G38910	BPC5	BBR-BPC	PeNAC046	61	90	-	-7.73418	2.29e-08	5.9e-05	ATATCTGAAAAGAGAGAGAGAGAGAGAGAG
AT4G15090	FAR1	FAR1	PeNAC105	419	433	-	21.4375	2.29e-08	0.00436	CCCCCACGCGCCTAG
AT2G45660	SOC1	MIKC_MADS	PeNAC007	864	884	+	19	2.29e-08	0.00012	tgtccttctctctctctctct
AT5G08070	TCP17	TCP	PeNAC063	332	342	+	23.3973	2.3e-08	0.00225	gtggtccccac
AT5G08070	TCP17	TCP	PeNAC101	667	677	+	23.3973	2.3e-08	0.00225	gtggtccccac
AT5G42520	BPC6	BBR-BPC	PeNAC015	383	403	-	19.8082	2.32e-08	4.9e-05	CACTCTCTCTCTCTATATATA
AT5G42520	BPC6	BBR-BPC	PeNAC008	871	891	+	19.8082	2.32e-08	4.9e-05	gtccttctctctctctctcca
AT2G45660	SOC1	MIKC_MADS	PeNAC102	165	185	-	18.9855	2.37e-08	0.00012	TTTTTTTTTTTTTTTTTTTCT
AT2G45660	SOC1	MIKC_MADS	PeNAC078	79	99	+	18.9855	2.37e-08	0.00012	tttctttctttcttttttttt
AT3G20310	ERF7	ERF	PeNAC089	579	599	+	21.8281	2.37e-08	0.00237	ccaccaccaccaccaccatca
AT5G66940	DOF5.8	Dof	PeNAC020	274	302	-	19.2969	2.38e-08	0.00053	TTTTTATTTTTTTTTTCTTTTTTTTTTCA
AT5G42520	BPC6	BBR-BPC	PeNAC025	710	730	+	19.7397	2.4e-08	5e-05	ctctctctctctatctctgtc
AT5G17430	BBM	AP2	PeNAC024	193	212	-	19.8354	2.42e-08	0.00024	AAAAAAAAAAAGAAAAGAAA
AT1G69570	CDF5	Dof	PeNAC055	218	244	+	19.9531	2.43e-08	0.00061	ttttctcttttttttttcctggttttt
AT5G42520	BPC6	BBR-BPC	PeNAC015	389	409	-	19.6986	2.45e-08	5.1e-05	TTCACCCACTCTCTCTCTCTA
AT5G17430	BBM	AP2	PeNAC046	64	83	-	19.8228	2.47e-08	0.00024	AAAAGAGAGAGAGAGAGAGA
AT2G18160	BZIP2	bZIP	PeNAC001	526	540	+	22.0469	2.51e-08	0.0051	catgatgacgtggca
AT1G49480	REM19	B3	PeNAC036	226	240	-	18.6765	2.55e-08	0.00139	GCCAAAAAAAAAAAA
AT5G42520	BPC6	BBR-BPC	PeNAC057	219	239	+	19.6027	2.56e-08	5.2e-05	tattctctctatctctctctc
AT5G42520	BPC6	BBR-BPC	PeNAC058	522	542	+	19.6027	2.56e-08	5.2e-05	tattctctctatctctctctc
AT5G15830	AtbZIP3	bZIP	PeNAC001	526	540	+	21.8594	2.58e-08	0.00514	catgatgacgtggca
AT4G38000	DOF4.7	Dof	PeNAC024	188	215	+	19.4219	2.61e-08	0.00065	ctttttttcttttctttttttttttttt
AT3G55370	OBP3	Dof	PeNAC021	29	49	+	18.8438	2.63e-08	0.00075	ttttctttttctgttttcttt
AT5G62940	DOF5.6	Dof	PeNAC102	235	255	+	17.7188	2.64e-08	0.00249	aataaaaagaaaaaggaaaat
AT5G42520	BPC6	BBR-BPC	PeNAC029	941	961	+	19.5205	2.66e-08	5.4e-05	ttcccttgctttctctctctc
AT1G30210	TCP24	TCP	PeNAC063	331	342	-	20.7656	2.68e-08	0.00249	GTGGGGACCACA
AT1G30210	TCP24	TCP	PeNAC101	666	677	-	20.7656	2.68e-08	0.00249	GTGGGGACCACA
AT1G34190	NAC017	NAC	PeNAC057	181	199	-	21.2812	2.69e-08	0.00138	AGGTTGCTTGGACGTCACG
AT1G34190	NAC017	NAC	PeNAC058	484	502	-	21.2812	2.69e-08	0.00138	AGGTTGCTTGGACGTCACG
AT1G51700	DOF1.7	Dof	PeNAC083	503	523	+	17.3906	2.7e-08	0.00143	aaaaagaaaaagaaaaaaaga
AT5G17430	BBM	AP2	PeNAC094	355	374	-	19.7595	2.7e-08	0.00025	AAAAAAGAGAAAAAGAAAAG
AT5G44210	ERF9	ERF	PeNAC089	576	596	-	21.7344	2.76e-08	0.00539	TGGTGGTGGTGGTGGTGGTGG
AT1G69570	CDF5	Dof	PeNAC024	182	208	+	19.8438	2.77e-08	0.00061	ctctctctttttttcttttcttttttt
AT5G17430	BBM	AP2	PeNAC083	492	511	+	19.7468	2.78e-08	0.00025	aaaaaaaaaagaaaaagaaa
AT5G02460	DOF5.1	Dof	PeNAC094	354	374	-	18.7969	2.79e-08	0.00072	AAAAAAGAGAAAAAGAAAAGA
AT2G28810	DOF2.2	Dof	PeNAC004	680	700	-	18.0938	2.8e-08	0.00224	GTCTCTCTTTTTAACTTTTTC
AT2G01930	BPC1	BBR-BPC	PeNAC074	558	581	-	19.0469	2.81e-08	6e-05	TTAGCAGAGAGAGAGAGAGAGAGA
AT5G62940	DOF5.6	Dof	PeNAC083	500	520	+	17.6875	2.81e-08	0.00249	aagaaaaagaaaaagaaaaaa
AT2G45660	SOC1	MIKC_MADS	PeNAC078	81	101	+	18.8986	2.82e-08	0.00014	tctttctttcttttttttttt
AT4G38000	DOF4.7	Dof	PeNAC024	192	219	+	19.3594	2.83e-08	0.00065	ttttcttttctttttttttttttttttt
AT4G38910	BPC5	BBR-BPC	PeNAC074	534	563	-	-8.60759	2.84e-08	7.3e-05	GAGAGAAGAGAGAGAGAGAGAGAGACTAAG
AT1G20640	NLP4	Nin-like	PeNAC066	974	988	+	18.75	2.85e-08	0.00113	gatgcagcagcagca
AT5G42520	BPC6	BBR-BPC	PeNAC025	712	732	+	19.3699	2.86e-08	5.7e-05	ctctctctctatctctgtcca
AT1G51700	DOF1.7	Dof	PeNAC102	238	258	+	17.3594	2.86e-08	0.00143	aaaaagaaaaaggaaaatgaa
AT5G02460	DOF5.1	Dof	PeNAC102	243	263	+	18.7812	2.87e-08	0.00072	gaaaaaggaaaatgaaaagga
AT5G25390	SHN3	ERF	PeNAC103	486	506	-	20.942	2.9e-08	0.00095	CGCTACGCCTCCTCCGCCGTA
AT4G38910	BPC5	BBR-BPC	PeNAC048	28	57	+	-8.70886	2.9e-08	7.3e-05	acagagagagggagagaaggagagagccgc
AT5G17430	BBM	AP2	PeNAC094	363	382	-	19.7089	2.93e-08	0.00025	AAAAAGAAAAAAAAGAGAAA
AT3G10800	BZIP28	bZIP	PeNAC001	526	540	+	20.3125	2.94e-08	0.00606	catgatgacgtggca
AT4G38000	DOF4.7	Dof	PeNAC083	495	522	-	19.3281	2.95e-08	0.00065	CTTTTTTTCTTTTTCTTTTTCTTTTTTT
AT4G38910	BPC5	BBR-BPC	PeNAC074	528	557	-	-8.79747	2.97e-08	7.4e-05	AGAGAGAGAGAGAGAGAGACTAAGGTTTCT
AT2G45660	SOC1	MIKC_MADS	PeNAC078	77	97	+	18.8696	2.98e-08	0.00014	cgtttctttctttcttttttt
AT5G17430	BBM	AP2	PeNAC083	494	513	+	19.6962	2.98e-08	0.00025	aaaaaaaagaaaaagaaaaa
AT2G01930	BPC1	BBR-BPC	PeNAC087	610	633	+	18.9062	3.01e-08	6.3e-05	agaacagtgagagagagagagagg
AT4G38910	BPC5	BBR-BPC	PeNAC074	530	559	-	-8.89873	3.03e-08	7.5e-05	GAAGAGAGAGAGAGAGAGAGACTAAGGTTT
AT2G45660	SOC1	MIKC_MADS	PeNAC048	30	50	-	18.8551	3.06e-08	0.00014	TCTCCTTCTCTCCCTCTCTCT
AT5G11260	HY5	bZIP	PeNAC001	526	540	+	21.2344	3.13e-08	0.00646	catgatgacgtggca
AT2G45660	SOC1	MIKC_MADS	PeNAC083	499	519	-	18.8406	3.15e-08	0.00014	TTTTTCTTTTTCTTTTTCTTT
AT3G06740	GATA15	GATA	PeNAC021	423	441	-	21.5217	3.19e-08	0.00218	CATCATCATCATCATACTT
AT3G24050	GATA1	GATA	PeNAC021	427	441	+	20.8088	3.24e-08	0.00094	atgatgatgatgatg
AT3G24050	GATA1	GATA	PeNAC021	430	444	+	20.8088	3.24e-08	0.00094	atgatgatgatgatg
AT4G28140	ERF054	ERF	PeNAC073	804	823	-	21.0469	3.29e-08	0.0061	GACGGTGATGGTGCGGGTGG
AT5G17430	BBM	AP2	PeNAC061	448	467	-	19.6329	3.3e-08	0.00026	AGAGAAGAAGAGAAGAGAAG
AT1G71450	ERF021	ERF	PeNAC089	583	602	+	21.2344	3.33e-08	0.00121	caccaccaccaccatcacca
AT5G22890	STOP2	C2H2	PeNAC065	499	516	+	20.2794	3.33e-08	0.00685	cagatatcacctgcaatt
AT2G28810	DOF2.2	Dof	PeNAC083	496	516	-	18	3.34e-08	0.00224	TTCTTTTTCTTTTTCTTTTTT
AT5G47220	ERF2	ERF	PeNAC089	576	596	+	21.6094	3.4e-08	0.0044	ccaccaccaccaccaccacca
AT2G45660	SOC1	MIKC_MADS	PeNAC083	495	515	-	18.7971	3.43e-08	0.00015	TCTTTTTCTTTTTCTTTTTTT
AT2G01930	BPC1	BBR-BPC	PeNAC023	752	775	-	18.6094	3.46e-08	7.2e-05	GCACGAGAGAGAGAGAGAGAGAGA
AT2G01930	BPC1	BBR-BPC	PeNAC094	417	440	-	18.5938	3.49e-08	7.2e-05	GAATGGGAGAGGGAGAGAGAGTGG
AT4G38910	BPC5	BBR-BPC	PeNAC007	851	880	-	-9.49367	3.5e-08	8.3e-05	AGAGAGAGAGAAGGACAGAGAGAGGGATTT
AT4G38910	BPC5	BBR-BPC	PeNAC008	857	886	-	-9.49367	3.5e-08	8.3e-05	AGAGAGAGAGAAGGACAGAGAGAGGGATTT
AT5G42520	BPC6	BBR-BPC	PeNAC094	414	434	+	18.9315	3.5e-08	6.9e-05	cctccactctctctccctctc
AT2G36270	ABI5	bZIP	PeNAC014	807	824	-	21.5938	3.5e-08	0.00505	TTGGGGACACGTGGCGGA
AT2G01930	BPC1	BBR-BPC	PeNAC043	59	82	+	18.5781	3.51e-08	7.2e-05	tatagggagagagagagagatgaa
AT4G38000	DOF4.7	Dof	PeNAC024	187	214	+	19.1875	3.54e-08	0.0007	tctttttttcttttcttttttttttttt
AT4G38910	BPC5	BBR-BPC	PeNAC062	384	413	-	-9.56962	3.56e-08	8.3e-05	AGAAAGAGAGATGTGGGGGGAGGGGGAGAG
AT2G01930	BPC1	BBR-BPC	PeNAC025	711	734	-	18.5469	3.57e-08	7.2e-05	ATTGGACAGAGATAGAGAGAGAGA
AT4G38910	BPC5	BBR-BPC	PeNAC023	757	786	-	-9.59494	3.58e-08	8.3e-05	GAAAAAAGCAAGCACGAGAGAGAGAGAGAG
AT4G38910	BPC5	BBR-BPC	PeNAC029	935	964	-	-9.63291	3.61e-08	8.3e-05	TGAGAGAGAGAGAAAGCAAGGGAAGAAGCA
AT1G71450	ERF021	ERF	PeNAC089	586	605	+	21.125	3.62e-08	0.00121	caccaccaccatcaccatct
AT4G38910	BPC5	BBR-BPC	PeNAC044	938	967	-	-9.65823	3.63e-08	8.3e-05	AGAATGAGAGAGAGGGAGAGGGAGCCAAGA
AT2G01570	RGA	GRAS	PeNAC065	131	150	-	19.0143	3.65e-08	0.00122	GAGGGAAAGACAAAGAAGGA
AT3G24050	GATA1	GATA	PeNAC073	811	825	-	20.6765	3.65e-08	0.00094	GTGACGGTGATGGTG
AT5G42520	BPC6	BBR-BPC	PeNAC044	940	960	+	18.8356	3.66e-08	7.1e-05	ttggctccctctccctctctc
AT1G71450	ERF021	ERF	PeNAC073	811	830	+	21.1094	3.67e-08	0.00121	caccatcaccgtcaccatca
AT5G62940	DOF5.6	Dof	PeNAC083	494	514	+	17.5469	3.69e-08	0.00249	aaaaaaaagaaaaagaaaaag
AT1G22810	ERF019	ERF	PeNAC089	575	589	-	21.1719	3.76e-08	0.00252	GGTGGTGGTGGTGGT
AT1G22810	ERF019	ERF	PeNAC089	578	592	-	21.1719	3.76e-08	0.00252	GGTGGTGGTGGTGGT
AT1G22810	ERF019	ERF	PeNAC089	581	595	-	21.1719	3.76e-08	0.00252	GGTGGTGGTGGTGGT
AT5G42520	BPC6	BBR-BPC	PeNAC015	874	894	+	18.7671	3.77e-08	7.3e-05	cacactctctctatctctcga
AT5G17430	BBM	AP2	PeNAC046	66	85	-	19.5063	3.93e-08	0.00028	TGAAAAGAGAGAGAGAGAGA
AT5G65130	AT5G65130	ERF	PeNAC089	576	590	+	21.375	3.93e-08	0.00252	ccaccaccaccacca
AT5G65130	AT5G65130	ERF	PeNAC089	579	593	+	21.375	3.93e-08	0.00252	ccaccaccaccacca
AT5G65130	AT5G65130	ERF	PeNAC089	582	596	+	21.375	3.93e-08	0.00252	ccaccaccaccacca
AT5G02460	DOF5.1	Dof	PeNAC094	363	383	-	18.5781	3.99e-08	0.00089	CAAAAAGAAAAAAAAGAGAAA
AT5G42520	BPC6	BBR-BPC	PeNAC074	561	581	+	18.6301	4.02e-08	7.7e-05	ctctctctctctctctgctaa
AT1G72740	AT1G72740	MYB_related	PeNAC077	886	900	+	20.8676	4.02e-08	0.00827	cgtaaaccctaaccc
AT2G01570	RGA	GRAS	PeNAC029	944	963	-	18.9429	4.04e-08	0.00122	GAGAGAGAGAGAAAGCAAGG
AT2G45660	SOC1	MIKC_MADS	PeNAC084	258	278	+	18.7101	4.06e-08	0.00017	tctcactctctctctttttct
AT5G66940	DOF5.8	Dof	PeNAC094	361	389	+	18.9219	4.07e-08	0.00081	tttttctcttttttttctttttgttcggt
AT4G38000	DOF4.7	Dof	PeNAC102	237	264	-	19.0781	4.07e-08	0.00073	CTCCTTTTCATTTTCCTTTTTCTTTTTA
AT2G45660	SOC1	MIKC_MADS	PeNAC102	167	187	-	18.6957	4.18e-08	0.00017	TTTTTTTTTTTTTTTTTTTTT
AT3G23690	BHLH77	bHLH	PeNAC091	733	747	-	19.8354	4.18e-08	0.0084	GCGAGGCCACGTGTG
AT3G20310	ERF7	ERF	PeNAC103	485	505	-	21.0938	4.2e-08	0.0028	GCTACGCCTCCTCCGCCGTAC
AT5G17430	BBM	AP2	PeNAC024	181	200	-	19.4684	4.21e-08	0.00028	AAAAGAAAAAAAGAGAGAGA
AT5G17430	BBM	AP2	PeNAC074	852	871	-	19.4684	4.21e-08	0.00028	GAGAAAAAAAAAAAAAGAAG
AT2G01930	BPC1	BBR-BPC	PeNAC087	612	635	+	18.1875	4.23e-08	8.4e-05	aacagtgagagagagagagagggg
AT2G45660	SOC1	MIKC_MADS	PeNAC078	83	103	+	18.6812	4.3e-08	0.00017	tttctttcttttttttttttt
AT2G45660	SOC1	MIKC_MADS	PeNAC074	558	578	+	18.6812	4.3e-08	0.00017	tctctctctctctctctctgc
AT4G38910	BPC5	BBR-BPC	PeNAC074	847	876	-	-10.4177	4.31e-08	9.8e-05	AGAGAGAGAAAAAAAAAAAAAGAAGGAAAG
AT3G24050	GATA1	GATA	PeNAC073	814	828	-	20.4559	4.35e-08	0.00099	ATGGTGACGGTGATG
AT2G01930	BPC1	BBR-BPC	PeNAC087	618	641	+	18.125	4.36e-08	8.6e-05	gagagagagagagaggggctatga
AT3G13810	AtIDD11	C2H2	PeNAC018	926	946	+	18.625	4.38e-08	0.00874	tttctgtttttgtcttctttt
AT2G45660	SOC1	MIKC_MADS	PeNAC078	85	105	+	18.6667	4.41e-08	0.00017	tctttcttttttttttttttt
AT4G38910	BPC5	BBR-BPC	PeNAC023	733	762	-	-10.5063	4.42e-08	9.8e-05	AGAGAGAGAGAGAGCGACAGGGAAGTGACG
AT5G47220	ERF2	ERF	PeNAC023	516	536	+	21.25	4.42e-08	0.0044	cgtcaccagccgccgccttgg
AT4G38910	BPC5	BBR-BPC	PeNAC008	869	898	-	-10.519	4.43e-08	9.8e-05	AAGTAACTGGAGAGAGAGAGAGAAGGACAG
AT5G42520	BPC6	BBR-BPC	PeNAC044	963	983	+	18.411	4.44e-08	8.2e-05	attctcctctctctctctctc
AT5G42520	BPC6	BBR-BPC	PeNAC044	969	989	+	18.411	4.44e-08	8.2e-05	ctctctctctctctccatccg
AT5G42520	BPC6	BBR-BPC	PeNAC057	215	235	+	18.3973	4.47e-08	8.2e-05	accttattctctctatctctc
AT5G42520	BPC6	BBR-BPC	PeNAC058	518	538	+	18.3973	4.47e-08	8.2e-05	accttattctctctatctctc
AT3G56850	DPBF3	bZIP	PeNAC014	809	823	-	21.1094	4.47e-08	0.00451	TGGGGACACGTGGCG
AT2G22750	AT2G22750	bHLH	PeNAC073	721	737	+	20.9726	4.49e-08	0.00918	cacgttcaccacgtgtc
AT4G38910	BPC5	BBR-BPC	PeNAC062	386	415	-	-10.5823	4.49e-08	9.8e-05	AAAGAAAGAGAGATGTGGGGGGAGGGGGAG
AT2G01930	BPC1	BBR-BPC	PeNAC015	385	408	+	18.0469	4.52e-08	8.8e-05	tatatagagagagagagtgggtga
AT5G61600	ERF104	ERF	PeNAC103	486	504	-	21.2188	4.57e-08	0.00893	CTACGCCTCCTCCGCCGTA
AT2G40620	BZIP18	bZIP	PeNAC081	658	668	+	19.0156	4.59e-08	0.00928	cccagctggca
AT2G01930	BPC1	BBR-BPC	PeNAC044	941	964	-	18	4.62e-08	8.9e-05	ATGAGAGAGAGGGAGAGGGAGCCA
AT2G45660	SOC1	MIKC_MADS	PeNAC065	212	232	+	18.6377	4.65e-08	0.00018	tttttttgtttttcttttttt
AT5G17430	BBM	AP2	PeNAC055	219	238	-	19.3924	4.68e-08	0.00028	CAGGAAAAAAAAAAGAGAAA
AT1G71450	ERF021	ERF	PeNAC053	759	778	-	20.7812	4.71e-08	0.00133	CACCACAGCCGGCTCCGTCT
AT4G38910	BPC5	BBR-BPC	PeNAC094	412	441	-	-10.8101	4.72e-08	0.0001	GGAATGGGAGAGGGAGAGAGAGTGGAGGAA
AT1G51600	GATA28	GATA	PeNAC073	811	829	+	20.4384	4.8e-08	0.00272	caccatcaccgtcaccatc
AT1G49720	ABF1	bZIP	PeNAC014	726	744	-	21.3256	4.84e-08	0.00909	GGACACGTGGCAAGCGTTG
AT5G17430	BBM	AP2	PeNAC046	60	79	-	19.3671	4.85e-08	0.00028	GAGAGAGAGAGAGAGAGAGA
AT5G17430	BBM	AP2	PeNAC023	750	769	-	19.3671	4.85e-08	0.00028	GAGAGAGAGAGAGAGAGAGA
AT5G17430	BBM	AP2	PeNAC023	752	771	-	19.3671	4.85e-08	0.00028	GAGAGAGAGAGAGAGAGAGA
AT5G17430	BBM	AP2	PeNAC021	835	854	-	19.3671	4.85e-08	0.00028	GAGAGAGAGAGAGAGAGAGA
AT5G17430	BBM	AP2	PeNAC007	870	889	-	19.3671	4.85e-08	0.00028	GAGAGAGAGAGAGAGAGAGA
AT1G21910	ERF012	ERF	PeNAC089	576	595	+	20.9062	4.93e-08	0.00483	ccaccaccaccaccaccacc
AT3G30530	ATBZIP42	bZIP	PeNAC001	528	539	+	21.8481	4.93e-08	0.0102	tgatgacgtggc
AT4G38910	BPC5	BBR-BPC	PeNAC021	834	863	-	-11.0759	5e-08	0.00011	TAGCATGAAGAGAGAGAGAGAGAGAGAGAG
AT2G45660	SOC1	MIKC_MADS	PeNAC024	181	201	+	18.5942	5.02e-08	0.00018	tctctctctttttttcttttc
AT2G45660	SOC1	MIKC_MADS	PeNAC024	196	216	+	18.5942	5.02e-08	0.00018	cttttcttttttttttttttt
AT3G55370	OBP3	Dof	PeNAC086	810	830	-	18.4219	5.04e-08	0.00125	TTGTCTTTTTTTTTTTTTTTT
AT2G01930	BPC1	BBR-BPC	PeNAC043	63	86	+	17.8125	5.04e-08	9.7e-05	gggagagagagagagatgaaggct
AT3G50410	DOF3.4	Dof	PeNAC102	244	264	-	17.0625	5.09e-08	0.00261	CTCCTTTTCATTTTCCTTTTT
AT4G27950	CRF4	ERF	PeNAC089	582	602	+	20.75	5.16e-08	0.005	ccaccaccaccaccatcacca
AT5G17430	BBM	AP2	PeNAC078	85	104	-	19.3165	5.17e-08	0.00029	AAAAAAAAAAAAAAGAAAGA
AT4G38910	BPC5	BBR-BPC	PeNAC023	755	784	-	-11.2152	5.17e-08	0.00011	AAAAAGCAAGCACGAGAGAGAGAGAGAGAG
AT2G01930	BPC1	BBR-BPC	PeNAC015	389	412	+	17.7344	5.23e-08	9.9e-05	tagagagagagagtgggtgaaaac
AT3G50410	DOF3.4	Dof	PeNAC040	254	274	-	17.0469	5.24e-08	0.00261	AGTTCTTTTTTTTTCCTTTTT
AT2G45660	SOC1	MIKC_MADS	PeNAC057	222	242	+	18.5652	5.28e-08	0.00019	tctctctatctctctctctct
AT2G45660	SOC1	MIKC_MADS	PeNAC058	525	545	+	18.5652	5.28e-08	0.00019	tctctctatctctctctctct
AT5G17430	BBM	AP2	PeNAC086	810	829	+	19.3038	5.29e-08	0.00029	aaaaaaaaaaaaaaaagaca
AT5G38800	BZIP43	bZIP	PeNAC001	528	539	-	21.4535	5.32e-08	0.0108	GCCACGTCATCA
AT5G09410	EICBP.B	CAMTA	PeNAC019	263	274	-	18.4062	5.32e-08	0.0103	GAAGCGCGTGAG
AT3G24050	GATA1	GATA	PeNAC073	817	831	-	20.2206	5.32e-08	0.00109	GTGATGGTGACGGTG
AT1G51600	GATA28	GATA	PeNAC021	423	441	-	20.2466	5.33e-08	0.00272	CATCATCATCATCATACTT
AT4G38000	DOF4.7	Dof	PeNAC024	190	217	+	18.8594	5.37e-08	0.00088	ttttttcttttctttttttttttttttt
AT4G38910	BPC5	BBR-BPC	PeNAC015	384	413	+	-11.4051	5.41e-08	0.00011	atatatagagagagagagtgggtgaaaact
AT2G45660	SOC1	MIKC_MADS	PeNAC024	200	220	+	18.5507	5.42e-08	0.00019	tcttttttttttttttttttt
AT2G01930	BPC1	BBR-BPC	PeNAC022	298	321	-	17.6562	5.43e-08	0.0001	TATATATATAGAGAGAGAGAGAGA
AT5G17430	BBM	AP2	PeNAC055	214	233	-	19.2785	5.48e-08	0.00029	AAAAAAAAAGAGAAAAGAGA
AT5G17430	BBM	AP2	PeNAC061	637	656	-	19.2785	5.48e-08	0.00029	AAAAAAAAAGAAAAAAGAAG
AT4G38910	BPC5	BBR-BPC	PeNAC102	811	840	-	-11.4557	5.49e-08	0.00011	ATAGAGAGAGAGAGAGGAGAGGCTGGAGAC
AT2G46270	GBF3	bZIP	PeNAC001	526	540	-	21.1094	5.49e-08	0.0111	TGCCACGTCATCATG
AT5G25190	ERF003	ERF	PeNAC089	575	593	-	20.8906	5.5e-08	0.00531	TGGTGGTGGTGGTGGTGGT
AT5G25190	ERF003	ERF	PeNAC089	578	596	-	20.8906	5.5e-08	0.00531	TGGTGGTGGTGGTGGTGGT
AT4G38910	BPC5	BBR-BPC	PeNAC089	347	376	+	-11.519	5.58e-08	0.00011	ggaaaaaaagagagagagatacaggtaggt
AT2G44840	ERF13	ERF	PeNAC081	583	597	+	20.7812	5.61e-08	0.0109	cccagccgccatctt
AT4G24470	ZIM	GATA	PeNAC098	330	344	-	20.9375	5.63e-08	0.0116	TCTCAGCCGTTAGAT
AT5G42520	BPC6	BBR-BPC	PeNAC023	755	775	+	17.8767	5.66e-08	0.0001	ctctctctctctctctcgtgc
AT1G12630	ERF027	ERF	PeNAC015	686	706	+	19.9531	5.7e-08	0.0101	ctacacgtgcaccgccgacac
AT1G45249	ABF2	bZIP	PeNAC014	728	745	+	20.9062	5.72e-08	0.00972	acgcttgccacgtgtccc
AT3G55370	OBP3	Dof	PeNAC024	184	204	+	18.3281	5.81e-08	0.00128	ctctctttttttcttttcttt
AT5G49300	GATA16	GATA	PeNAC089	577	603	+	16.3218	5.85e-08	0.00397	caccaccaccaccaccaccatcaccat
AT2G45660	SOC1	MIKC_MADS	PeNAC024	190	210	+	18.5072	5.85e-08	0.0002	ttttttcttttcttttttttt
AT5G18450	DREB2G	ERF	PeNAC014	472	486	-	20.75	5.88e-08	0.00435	GGTGGAGGAGGTGGA
AT4G38000	DOF4.7	Dof	PeNAC024	189	216	+	18.7812	5.91e-08	0.00088	tttttttcttttcttttttttttttttt
AT5G17430	BBM	AP2	PeNAC074	541	560	-	19.2152	5.95e-08	0.0003	AGAAGAGAGAGAGAGAGAGA
AT3G06740	GATA15	GATA	PeNAC073	811	829	+	20.5362	5.99e-08	0.00281	caccatcaccgtcaccatc
AT2G28810	DOF2.2	Dof	PeNAC083	502	522	-	17.6719	6e-08	0.00236	CTTTTTTTCTTTTTCTTTTTC
AT2G01930	BPC1	BBR-BPC	PeNAC060	763	786	-	17.4375	6e-08	0.00011	GAGAGGAGAGGAGAGGAAGAGAGA
AT2G01930	BPC1	BBR-BPC	PeNAC082	894	917	+	17.4375	6e-08	0.00011	cagaaagagggaaggagagaggaa
AT5G06960	TGA5	bZIP	PeNAC002	227	240	-	20.8906	6.02e-08	0.0124	GATGACGTCATCAC
AT2G01930	BPC1	BBR-BPC	PeNAC087	616	639	+	17.4219	6.05e-08	0.00011	gtgagagagagagagaggggctat
AT2G04038	AtbZIP48	bZIP	PeNAC001	526	539	-	21.4688	6.06e-08	0.0124	GCCACGTCATCATG
AT1G72050	TFIIIA	C2H2	PeNAC063	898	916	+	20.4622	6.08e-08	0.00187	tcttctccttctccttctc
AT2G01930	BPC1	BBR-BPC	PeNAC084	250	273	-	17.4062	6.09e-08	0.00011	AAGAGAGAGAGTGAGAGAGATTTT
AT5G42520	BPC6	BBR-BPC	PeNAC044	965	985	+	17.6849	6.16e-08	0.00011	tctcctctctctctctctcca
AT2G45660	SOC1	MIKC_MADS	PeNAC021	827	847	+	18.4783	6.17e-08	0.00021	ccttcccctctctctctctct
AT3G47600	MYB94	MYB	PeNAC033	611	629	+	19.1562	6.17e-08	0.0126	gtgaaggtggttggacagg
AT5G17430	BBM	AP2	PeNAC021	833	852	-	19.1772	6.25e-08	0.00031	GAGAGAGAGAGAGAGAGAGG
AT4G38000	DOF4.7	Dof	PeNAC024	193	220	+	18.7344	6.27e-08	0.00088	tttcttttcttttttttttttttttttt
AT2G01930	BPC1	BBR-BPC	PeNAC074	541	564	-	17.3438	6.27e-08	0.00011	AGAGAGAAGAGAGAGAGAGAGAGA
AT5G42520	BPC6	BBR-BPC	PeNAC087	612	632	-	17.6438	6.28e-08	0.00011	CTCTCTCTCTCTCTCACTGTT
AT5G42520	BPC6	BBR-BPC	PeNAC074	559	579	+	17.6301	6.31e-08	0.00011	ctctctctctctctctctgct
AT2G01930	BPC1	BBR-BPC	PeNAC025	703	726	-	17.3125	6.36e-08	0.00011	GAGATAGAGAGAGAGAGATTGGAC
AT5G42520	BPC6	BBR-BPC	PeNAC102	819	839	+	17.6027	6.39e-08	0.00011	cctctcctctctctctctcta
AT5G17430	BBM	AP2	PeNAC072	848	867	-	19.1519	6.43e-08	0.00031	AGAAAAAAAAAGGAAAGAAA
AT2G28810	DOF2.2	Dof	PeNAC040	253	273	-	17.625	6.48e-08	0.00236	GTTCTTTTTTTTTCCTTTTTT
AT2G45660	SOC1	MIKC_MADS	PeNAC095	429	449	+	18.4493	6.49e-08	0.00021	tctctcttttcctctctccct
AT2G45660	SOC1	MIKC_MADS	PeNAC008	870	890	+	18.4493	6.49e-08	0.00021	tgtccttctctctctctctcc
AT5G42520	BPC6	BBR-BPC	PeNAC072	550	570	+	17.5616	6.51e-08	0.00011	cttagtctctctctctctttt
AT1G44830	ERF014	ERF	PeNAC089	576	590	+	20.8125	6.56e-08	0.0044	ccaccaccaccacca
AT1G44830	ERF014	ERF	PeNAC089	579	593	+	20.8125	6.56e-08	0.0044	ccaccaccaccacca
AT1G44830	ERF014	ERF	PeNAC089	582	596	+	20.8125	6.56e-08	0.0044	ccaccaccaccacca
AT2G36270	ABI5	bZIP	PeNAC001	525	542	+	21	6.56e-08	0.00505	acatgatgacgtggcaca
AT3G50410	DOF3.4	Dof	PeNAC083	497	517	-	16.9219	6.66e-08	0.00265	TTTCTTTTTCTTTTTCTTTTT
AT1G69570	CDF5	Dof	PeNAC055	211	237	+	19.0938	6.73e-08	0.00134	gtgtctcttttctcttttttttttcct
AT1G72050	TFIIIA	C2H2	PeNAC023	148	166	+	20.3193	6.75e-08	0.00187	ccctctcctcctcctctat
AT5G66940	DOF5.8	Dof	PeNAC102	231	259	-	18.5469	6.77e-08	0.00122	TTTCATTTTCCTTTTTCTTTTTATTTCTC
AT2G45660	SOC1	MIKC_MADS	PeNAC034	696	716	+	18.4203	6.84e-08	0.00022	tttttttttttttttttcttt
AT1G12610	DREB1F	ERF	PeNAC032	287	301	-	20.0147	6.85e-08	0.0141	CCATGTCGACGACGA
AT3G06740	GATA15	GATA	PeNAC089	586	604	+	20.3188	6.85e-08	0.00281	caccaccaccatcaccatc
AT1G72050	TFIIIA	C2H2	PeNAC061	420	438	+	20.2941	6.87e-08	0.00187	tttcctccacttccttctc
AT1G09530	PIF3	bHLH	PeNAC077	567	576	-	18	6.91e-08	0.0137	GGCCACGTGG
AT2G44940	ERF034	ERF	PeNAC016	324	338	-	19.5312	6.92e-08	0.00684	CTGTGTCGGCGGTGC
AT2G44940	ERF034	ERF	PeNAC015	694	708	-	19.5312	6.92e-08	0.00684	CTGTGTCGGCGGTGC
AT3G55370	OBP3	Dof	PeNAC078	86	106	+	18.2031	6.98e-08	0.00139	ctttcttttttttttttttta
AT2G45660	SOC1	MIKC_MADS	PeNAC074	846	866	+	18.4058	7.01e-08	0.00022	tctttccttcttttttttttt
AT5G17430	BBM	AP2	PeNAC074	556	575	-	19.0886	7.03e-08	0.00032	GAGAGAGAGAGAGAGAGAAG
AT5G17430	BBM	AP2	PeNAC007	868	887	-	19.0886	7.03e-08	0.00032	GAGAGAGAGAGAGAGAGAAG
AT5G43410	ERF096	ERF	PeNAC026	747	756	-	17.0752	7.04e-08	0.0124	GCGCCGCCGG
AT2G01930	BPC1	BBR-BPC	PeNAC046	64	87	-	17.0469	7.19e-08	0.00013	TCTGAAAAGAGAGAGAGAGAGAGA
AT5G18560	ERF086	ERF	PeNAC103	485	499	-	20.75	7.26e-08	0.0147	CCTCCTCCGCCGTAC
AT4G38000	DOF4.7	Dof	PeNAC024	191	218	+	18.6094	7.3e-08	0.00096	tttttcttttcttttttttttttttttt
AT5G06950	TGA2	bZIP	PeNAC002	221	240	-	20.7188	7.35e-08	0.00909	GATGACGTCATCACCAATTC
AT2G45660	SOC1	MIKC_MADS	PeNAC020	275	295	-	18.3768	7.36e-08	0.00023	TTTTTTTTTCTTTTTTTTTTC
AT5G17430	BBM	AP2	PeNAC089	346	365	+	19.0506	7.38e-08	0.00032	tggaaaaaaagagagagaga
AT2G28810	DOF2.2	Dof	PeNAC041	718	738	+	17.5469	7.4e-08	0.00236	ttttttttttcctcctttttg
AT4G38910	BPC5	BBR-BPC	PeNAC025	706	735	-	-12.7722	7.48e-08	0.00015	AATTGGACAGAGATAGAGAGAGAGAGATTG
AT1G69570	CDF5	Dof	PeNAC091	528	554	+	19	7.49e-08	0.00136	ggtgctcttttttcttttttttttcct
AT4G38910	BPC5	BBR-BPC	PeNAC104	479	508	+	-12.7848	7.5e-08	0.00015	aaaaagagggagagagcggtggtttcagag
AT2G01930	BPC1	BBR-BPC	PeNAC082	900	923	+	16.9531	7.51e-08	0.00013	gagggaaggagagaggaaggctga
AT5G17430	BBM	AP2	PeNAC002	96	115	-	19.038	7.51e-08	0.00032	AAAAAAAAAAAGAGGAGAGA
AT5G17430	BBM	AP2	PeNAC024	196	215	-	19.038	7.51e-08	0.00032	AAAAAAAAAAAAAAGAAAAG
AT5G17430	BBM	AP2	PeNAC074	545	564	-	19.038	7.51e-08	0.00032	AGAGAGAAGAGAGAGAGAGA
AT2G45660	SOC1	MIKC_MADS	PeNAC094	353	373	+	18.3623	7.53e-08	0.00023	ctcttttctttttctcttttt
AT2G36270	ABI5	bZIP	PeNAC014	731	748	-	20.8594	7.53e-08	0.00505	CTGGGGACACGTGGCAAG
AT2G01930	BPC1	BBR-BPC	PeNAC043	57	80	+	16.9375	7.56e-08	0.00013	tgtatagggagagagagagagatg
AT2G01570	RGA	GRAS	PeNAC007	856	875	-	18.4714	7.63e-08	0.00122	GAGAGAAGGACAGAGAGAGG
AT2G01570	RGA	GRAS	PeNAC008	862	881	-	18.4714	7.63e-08	0.00122	GAGAGAAGGACAGAGAGAGG
AT5G42520	BPC6	BBR-BPC	PeNAC021	840	860	+	17.1918	7.66e-08	0.00013	ctctctctctctctcttcatg
AT2G01930	BPC1	BBR-BPC	PeNAC074	550	573	-	16.8906	7.72e-08	0.00013	GAGAGAGAGAGAGAGAAGAGAGAG
AT1G72050	TFIIIA	C2H2	PeNAC017	716	734	-	20.1176	7.77e-08	0.00187	CCTCCTTCCCCTCCTCATA
AT1G72050	TFIIIA	C2H2	PeNAC019	716	734	-	20.1176	7.77e-08	0.00187	CCTCCTTCCCCTCCTCATA
AT2G01570	RGA	GRAS	PeNAC079	959	978	-	18.4571	7.77e-08	0.00122	AACAACAAGACAAAAGCAGA
AT4G38910	BPC5	BBR-BPC	PeNAC084	259	288	-	-13.0127	7.87e-08	0.00016	ATTAATATATAGAAAAAGAGAGAGAGTGAG
AT2G45660	SOC1	MIKC_MADS	PeNAC072	851	871	+	18.3333	7.91e-08	0.00024	ctttcctttttttttctctct
AT4G38910	BPC5	BBR-BPC	PeNAC046	47	76	-	-13.038	7.93e-08	0.00016	AGAGAGAGAGAGAGAGAGTGCAGAAAATAT
AT3G46070	AT3G46070	C2H2	PeNAC084	254	268	+	17.3699	7.93e-08	0.0139	tctctctcactctct
AT1G69010	BIM2	bHLH	PeNAC094	489	503	+	19.9531	7.94e-08	0.0124	cacgtgtccagcacg
AT2G35530	BZIP16	bZIP	PeNAC014	733	747	-	20.7812	7.98e-08	0.0157	TGGGGACACGTGGCA
AT1G71450	ERF021	ERF	PeNAC103	488	507	-	20.0781	7.99e-08	0.00197	ACGCTACGCCTCCTCCGCCG
AT5G60130	AT5G60130	B3	PeNAC026	565	583	-	19.1875	8.06e-08	0.0131	AGGCAAAACAAAAGCAAAT
AT5G10510	AIL6	AP2	PeNAC085	542	556	-	19.125	8.1e-08	0.0165	CCTCGGGATTGGTGC
AT5G17430	BBM	AP2	PeNAC094	361	380	-	18.9747	8.13e-08	0.00034	AAAGAAAAAAAAGAGAAAAA
AT4G27950	CRF4	ERF	PeNAC103	479	499	-	20.0147	8.16e-08	0.00521	CCTCCTCCGCCGTACAAACCG
AT1G22070	TGA3	bZIP	PeNAC002	227	240	-	20.5938	8.18e-08	0.0156	GATGACGTCATCAC
AT4G38910	BPC5	BBR-BPC	PeNAC087	619	648	+	-13.1646	8.21e-08	0.00016	agagagagagagaggggctatgaccgaccc
AT2G28810	DOF2.2	Dof	PeNAC102	243	263	-	17.4844	8.21e-08	0.00236	TCCTTTTCATTTTCCTTTTTC
AT5G42520	BPC6	BBR-BPC	PeNAC072	548	568	+	17.0274	8.24e-08	0.00014	accttagtctctctctctctt
AT2G01930	BPC1	BBR-BPC	PeNAC029	936	959	-	16.75	8.24e-08	0.00014	GAGAGAGAAAGCAAGGGAAGAAGC
AT1G73730	EIL3	EIL	PeNAC056	325	345	+	19.7848	8.26e-08	0.0169	ccgtccaggttcaggcatccc
AT3G27010	TCP20	TCP	PeNAC063	332	352	-	20.5312	8.28e-08	0.00858	GGAGTGGAGGGTGGGGACCAC
AT2G01930	BPC1	BBR-BPC	PeNAC023	738	761	-	16.7188	8.36e-08	0.00014	GAGAGAGAGAGAGCGACAGGGAAG
AT4G30980	LRL2	bHLH	PeNAC021	379	393	+	20.6628	8.36e-08	0.0112	cttgcttgccacgtg
AT2G01570	RGA	GRAS	PeNAC062	256	275	+	18.4	8.38e-08	0.00122	gaaaagaagagaaaagaagg
AT1G65620	LBD6	LBD	PeNAC051	769	789	+	20.1875	8.41e-08	0.0161	ccaccggcgtagtcaccggcc
AT5G17430	BBM	AP2	PeNAC078	81	100	-	18.9494	8.41e-08	0.00034	AAAAAAAAAAGAAAGAAAGA
AT5G61270	BHLH72	bHLH	PeNAC023	261	275	+	20.2466	8.42e-08	0.0168	ctgcttgccacgtgg
AT1G03800	ERF10	ERF	PeNAC089	575	595	+	20.375	8.48e-08	0.00756	accaccaccaccaccaccacc
AT5G18450	DREB2G	ERF	PeNAC089	575	589	-	20.3281	8.53e-08	0.00435	GGTGGTGGTGGTGGT
AT5G18450	DREB2G	ERF	PeNAC089	578	592	-	20.3281	8.53e-08	0.00435	GGTGGTGGTGGTGGT
AT5G18450	DREB2G	ERF	PeNAC089	581	595	-	20.3281	8.53e-08	0.00435	GGTGGTGGTGGTGGT
AT5G42520	BPC6	BBR-BPC	PeNAC095	430	450	+	16.9315	8.59e-08	0.00015	ctctcttttcctctctccctt
AT4G38910	BPC5	BBR-BPC	PeNAC046	65	94	-	-13.3797	8.63e-08	0.00017	AGAAATATCTGAAAAGAGAGAGAGAGAGAG
AT5G02460	DOF5.1	Dof	PeNAC039	934	954	-	18.0938	8.67e-08	0.00174	CAAAAAGCAGAAAACAAAGAA
AT2G45660	SOC1	MIKC_MADS	PeNAC022	619	639	+	18.2754	8.7e-08	0.00026	ttttttcttctttttttttcg
AT2G01930	BPC1	BBR-BPC	PeNAC057	214	237	-	16.625	8.72e-08	0.00014	GAGAGAGATAGAGAGAATAAGGTT
AT2G01930	BPC1	BBR-BPC	PeNAC094	419	442	-	16.625	8.72e-08	0.00014	GGGAATGGGAGAGGGAGAGAGAGT
AT2G01930	BPC1	BBR-BPC	PeNAC058	517	540	-	16.625	8.72e-08	0.00014	GAGAGAGATAGAGAGAATAAGGTT
AT3G23210	BHLH34	bHLH	PeNAC101	688	710	-	19.6406	8.72e-08	0.0144	GAGGACGACACGTGCATAGGGGG
AT1G69570	CDF5	Dof	PeNAC094	272	298	-	18.8594	8.77e-08	0.00144	TTTTTCCTTTTTTTTTTTGCTTTTCGA
AT1G75490	DREB2D	ERF	PeNAC056	547	561	+	20.2031	8.83e-08	0.00497	ctacagccaccgcct
AT5G06950	TGA2	bZIP	PeNAC002	229	248	+	20.5469	8.86e-08	0.00909	gatgacgtcatccttccttg
AT1G46768	RAP2-1	ERF	PeNAC016	324	336	-	19.6094	8.91e-08	0.00869	GTGTCGGCGGTGC
AT1G46768	RAP2-1	ERF	PeNAC015	694	706	-	19.6094	8.91e-08	0.00869	GTGTCGGCGGTGC
AT3G55370	OBP3	Dof	PeNAC065	194	214	+	18.0312	8.95e-08	0.00154	tcttctttttgctcttttttt
AT2G01930	BPC1	BBR-BPC	PeNAC007	856	879	-	16.5625	8.97e-08	0.00015	GAGAGAGAGAAGGACAGAGAGAGG
AT2G01930	BPC1	BBR-BPC	PeNAC008	862	885	-	16.5625	8.97e-08	0.00015	GAGAGAGAGAAGGACAGAGAGAGG
AT4G38000	DOF4.7	Dof	PeNAC060	604	631	+	18.4375	8.99e-08	0.00108	tcattttatcttttttattttctttttg
AT2G01570	RGA	GRAS	PeNAC021	833	852	-	18.3429	9.02e-08	0.00122	GAGAGAGAGAGAGAGAGAGG
AT4G38910	BPC5	BBR-BPC	PeNAC057	213	242	-	-13.5823	9.06e-08	0.00017	AGAGAGAGAGAGATAGAGAGAATAAGGTTT
AT4G38910	BPC5	BBR-BPC	PeNAC022	291	320	-	-13.5823	9.06e-08	0.00017	ATATATATAGAGAGAGAGAGAGAGAGCATT
AT4G38910	BPC5	BBR-BPC	PeNAC058	516	545	-	-13.5823	9.06e-08	0.00017	AGAGAGAGAGAGATAGAGAGAATAAGGTTT
AT1G71930	NAC030	NAC	PeNAC052	59	70	+	17.6642	9.14e-08	0.0177	ggacacgccact
AT4G38910	BPC5	BBR-BPC	PeNAC044	944	973	-	-13.6456	9.19e-08	0.00017	GAGAGGAGAATGAGAGAGAGGGAGAGGGAG
AT2G01930	BPC1	BBR-BPC	PeNAC008	870	893	-	16.5	9.23e-08	0.00015	ACTGGAGAGAGAGAGAGAAGGACA
AT1G49480	REM19	B3	PeNAC102	166	180	+	18.3529	9.26e-08	0.00139	gaaaaaaaaaaaaaa
AT1G49480	REM19	B3	PeNAC101	623	637	-	18.3529	9.26e-08	0.00139	GAAAAAAAAAAAAAA
AT1G49480	REM19	B3	PeNAC034	699	713	-	18.3529	9.26e-08	0.00139	GAAAAAAAAAAAAAA
AT2G45660	SOC1	MIKC_MADS	PeNAC074	550	570	+	18.2319	9.34e-08	0.00026	ctctctcttctctctctctct
AT1G69570	CDF5	Dof	PeNAC059	798	824	-	18.7969	9.41e-08	0.00144	TCTTTGCCTTTTCTTTTTTTTTTTGTA
AT1G45249	ABF2	bZIP	PeNAC001	528	545	-	20.4219	9.5e-08	0.00972	TGATGTGCCACGTCATCA
AT3G24050	GATA1	GATA	PeNAC017	645	659	+	19.6176	9.52e-08	0.00163	atgatggtggtgggg
AT3G24050	GATA1	GATA	PeNAC019	645	659	+	19.6176	9.52e-08	0.00163	atgatggtggtgggg
AT1G32150	BZIP68	bZIP	PeNAC001	526	540	-	20.0156	9.54e-08	0.0186	TGCCACGTCATCATG
AT4G38000	DOF4.7	Dof	PeNAC024	194	221	+	18.375	9.69e-08	0.00108	ttcttttctttttttttttttttttttg
AT2G01930	BPC1	BBR-BPC	PeNAC102	818	841	-	16.3906	9.7e-08	0.00015	AATAGAGAGAGAGAGAGGAGAGGC
AT2G01930	BPC1	BBR-BPC	PeNAC089	348	371	+	16.375	9.77e-08	0.00015	gaaaaaaagagagagagatacagg
AT4G38000	DOF4.7	Dof	PeNAC020	280	307	-	18.3594	9.87e-08	0.00108	CTGCATTTTTATTTTTTTTTTCTTTTTT
AT5G47220	ERF2	ERF	PeNAC089	579	599	+	20.0938	9.94e-08	0.00617	ccaccaccaccaccaccatca
AT2G01930	BPC1	BBR-BPC	PeNAC095	427	450	-	16.3281	9.98e-08	0.00016	AAGGGAGAGAGGAAAAGAGAGAAC
AT5G46590	anac096	NAC	PeNAC067	645	660	-	18.8281	1e-07	0.0193	CGTGGAGGTGAAGGAA
AT2G45660	SOC1	MIKC_MADS	PeNAC057	230	250	+	18.1884	1e-07	0.00026	tctctctctctctctctccca
AT2G45660	SOC1	MIKC_MADS	PeNAC058	533	553	+	18.1884	1e-07	0.00026	tctctctctctctctctccca
AT2G45660	SOC1	MIKC_MADS	PeNAC061	640	660	+	18.1884	1e-07	0.00026	cttttttctttttttttttct
AT2G45660	SOC1	MIKC_MADS	PeNAC018	975	995	+	18.1884	1e-07	0.00026	ctctgctctctctctctctct
AT2G01570	RGA	GRAS	PeNAC029	862	881	-	18.2571	1.01e-07	0.00122	CAGAAGGGGAGAAAGGGAAG
AT1G75490	DREB2D	ERF	PeNAC089	576	590	+	20.0625	1.01e-07	0.00497	ccaccaccaccacca
AT1G75490	DREB2D	ERF	PeNAC089	579	593	+	20.0625	1.01e-07	0.00497	ccaccaccaccacca
AT1G75490	DREB2D	ERF	PeNAC089	582	596	+	20.0625	1.01e-07	0.00497	ccaccaccaccacca
AT5G42520	BPC6	BBR-BPC	PeNAC029	945	965	+	16.5342	1.02e-07	0.00017	cttgctttctctctctctcat
AT2G45660	SOC1	MIKC_MADS	PeNAC007	858	878	+	18.1739	1.03e-07	0.00026	tctctctgtccttctctctct
AT2G45660	SOC1	MIKC_MADS	PeNAC008	864	884	+	18.1739	1.03e-07	0.00026	tctctctgtccttctctctct
AT5G51910	TCP19	TCP	PeNAC023	214	223	+	18.617	1.04e-07	0.0132	cggggcccac
AT1G35560	TCP23	TCP	PeNAC023	215	224	+	20.8966	1.04e-07	0.0162	ggggcccacc
AT2G01570	RGA	GRAS	PeNAC074	552	571	-	18.2286	1.04e-07	0.00122	GAGAGAGAGAGAGAAGAGAG
AT5G17430	BBM	AP2	PeNAC021	841	860	-	18.7722	1.05e-07	0.00041	CATGAAGAGAGAGAGAGAGA
AT4G38910	BPC5	BBR-BPC	PeNAC022	287	316	-	-14.2278	1.05e-07	0.00019	ATATAGAGAGAGAGAGAGAGAGCATTAACT
AT2G45660	SOC1	MIKC_MADS	PeNAC097	87	107	+	18.1594	1.05e-07	0.00026	tgtttttctttttcttttttt
AT2G45660	SOC1	MIKC_MADS	PeNAC013	109	129	+	18.1594	1.05e-07	0.00026	tgtttttctttttcttttttt
AT2G45660	SOC1	MIKC_MADS	PeNAC012	110	130	+	18.1594	1.05e-07	0.00026	tgtttttctttttcttttttt
AT2G45660	SOC1	MIKC_MADS	PeNAC024	192	212	+	18.1594	1.05e-07	0.00026	ttttcttttcttttttttttt
AT4G38910	BPC5	BBR-BPC	PeNAC095	214	243	-	-14.2405	1.05e-07	0.00019	AGAGAAAGAGAGAAAACAGGCCAGAAAGAA
AT3G20310	ERF7	ERF	PeNAC073	804	824	+	19.8438	1.06e-07	0.0053	ccacccgcaccatcaccgtca
AT4G18450	ERF091	ERF	PeNAC023	518	534	-	20.1094	1.06e-07	0.0104	AAGGCGGCGGCTGGTGA
AT4G18450	ERF091	ERF	PeNAC103	487	503	+	20.1094	1.06e-07	0.0104	acggcggaggaggcgta
AT5G02460	DOF5.1	Dof	PeNAC040	253	273	+	17.9531	1.06e-07	0.00194	aaaaaaggaaaaaaaaagaac
AT5G42520	BPC6	BBR-BPC	PeNAC072	854	874	+	16.4384	1.06e-07	0.00018	tcctttttttttctctctcta
AT2G01570	RGA	GRAS	PeNAC018	928	947	-	18.2143	1.06e-07	0.00122	AAAAAGAAGACAAAAACAGA
AT5G17430	BBM	AP2	PeNAC057	230	249	-	18.7595	1.06e-07	0.00041	GGGAGAGAGAGAGAGAGAGA
AT5G17430	BBM	AP2	PeNAC058	533	552	-	18.7595	1.06e-07	0.00041	GGGAGAGAGAGAGAGAGAGA
AT4G27950	CRF4	ERF	PeNAC089	579	599	+	19.5588	1.08e-07	0.00521	ccaccaccaccaccaccatca
AT2G45660	SOC1	MIKC_MADS	PeNAC102	166	186	-	18.1449	1.08e-07	0.00026	TTTTTTTTTTTTTTTTTTTTC
AT2G45660	SOC1	MIKC_MADS	PeNAC074	552	572	+	18.1449	1.08e-07	0.00026	ctctcttctctctctctctct
AT5G66940	DOF5.8	Dof	PeNAC004	674	702	-	18.1875	1.08e-07	0.00168	CTGTCTCTCTTTTTAACTTTTTCTGCCAT
AT5G65210	TGA1	bZIP	PeNAC002	229	243	-	20.3125	1.08e-07	0.0112	AAGGATGACGTCATC
AT2G31230	ERF15	ERF	PeNAC103	487	501	-	20.2344	1.08e-07	0.0216	CGCCTCCTCCGCCGT
AT3G55370	OBP3	Dof	PeNAC097	90	110	+	17.8906	1.09e-07	0.00154	ttttctttttctttttttgat
AT3G55370	OBP3	Dof	PeNAC013	112	132	+	17.8906	1.09e-07	0.00154	ttttctttttctttttttgat
AT3G55370	OBP3	Dof	PeNAC012	113	133	+	17.8906	1.09e-07	0.00154	ttttctttttctttttttgat
AT1G18960	AT1G18960	MYB_related	PeNAC089	574	595	+	17.8904	1.09e-07	0.00726	aaccaccaccaccaccaccacc
AT3G45150	TCP16	TCP	PeNAC023	213	223	+	20.8354	1.09e-07	0.0164	gcggggcccac
AT4G38910	BPC5	BBR-BPC	PeNAC025	702	731	-	-14.3797	1.09e-07	0.0002	GGACAGAGATAGAGAGAGAGAGATTGGACC
AT1G77920	TGA7	bZIP	PeNAC002	225	241	-	20.2812	1.1e-07	0.0113	GGATGACGTCATCACCA
AT1G49480	REM19	B3	PeNAC086	807	821	+	18.3088	1.1e-07	0.00139	accaaaaaaaaaaaa
AT1G59640	BPE	bHLH	PeNAC014	728	748	-	19	1.1e-07	0.0221	CTGGGGACACGTGGCAAGCGT
AT2G01930	BPC1	BBR-BPC	PeNAC063	895	918	-	16.1094	1.1e-07	0.00017	AGGAGAAGGAGAAGGAGAAGAAGA
AT5G66940	DOF5.8	Dof	PeNAC034	697	725	+	18.1719	1.1e-07	0.00168	ttttttttttttttttctttctcgctttc
AT2G45660	SOC1	MIKC_MADS	PeNAC085	977	997	-	18.1304	1.1e-07	0.00027	TCTTTTTTTTTTCCTCTCCTT
AT2G28810	DOF2.2	Dof	PeNAC094	363	383	+	17.2969	1.11e-07	0.00278	tttctcttttttttctttttg
AT4G38910	BPC5	BBR-BPC	PeNAC025	716	745	-	-14.443	1.11e-07	0.0002	CAAGAGACAGAATTGGACAGAGATAGAGAG
AT3G45610	DOF3.2	Dof	PeNAC094	542	560	+	16.8594	1.11e-07	0.0227	gccactttttgcgtttttg
AT4G38910	BPC5	BBR-BPC	PeNAC007	867	896	-	-14.4557	1.12e-07	0.0002	GTAACTGGAGAGAGAGAGAGAGAGAGAAGG
AT2G02820	MYB88	MYB	PeNAC105	419	433	-	18.9219	1.12e-07	0.0211	CCCCCACGCGCCTAG
AT1G69570	CDF5	Dof	PeNAC072	840	866	+	18.6406	1.12e-07	0.00159	tgttcccttttctttcctttttttttc
AT2G01570	RGA	GRAS	PeNAC095	223	242	-	18.1714	1.13e-07	0.00122	GAGAAAGAGAGAAAACAGGC
AT2G01570	RGA	GRAS	PeNAC061	447	466	-	18.1714	1.13e-07	0.00122	GAGAAGAAGAGAAGAGAAGA
AT5G42520	BPC6	BBR-BPC	PeNAC089	350	370	-	16.2877	1.14e-07	0.00019	CTGTATCTCTCTCTCTTTTTT
AT5G61600	ERF104	ERF	PeNAC089	577	595	+	19.8906	1.14e-07	0.01	caccaccaccaccaccacc
AT2G01570	RGA	GRAS	PeNAC079	53	72	+	18.1571	1.15e-07	0.00122	cagaaaaaaacaaagagagg
AT2G45660	SOC1	MIKC_MADS	PeNAC074	850	870	+	18.1014	1.15e-07	0.00028	tccttctttttttttttttct
AT4G38910	BPC5	BBR-BPC	PeNAC025	712	741	-	-14.6456	1.16e-07	0.0002	AGACAGAATTGGACAGAGATAGAGAGAGAG
AT3G57600	DREB2F	ERF	PeNAC056	550	560	+	20.0938	1.16e-07	0.0134	cagccaccgcc
AT1G68550	ERF118	ERF	PeNAC023	519	533	+	19.9844	1.17e-07	0.0121	caccagccgccgcct
AT1G03800	ERF10	ERF	PeNAC023	515	535	+	19.9062	1.17e-07	0.00756	ccgtcaccagccgccgccttg
AT2G45660	SOC1	MIKC_MADS	PeNAC061	636	656	+	18.087	1.18e-07	0.00028	tcttcttttttcttttttttt
AT5G17430	BBM	AP2	PeNAC088	842	861	+	18.6709	1.19e-07	0.00044	aggaagaagaaaaaaagaaa
AT2G01570	RGA	GRAS	PeNAC046	60	79	-	18.1286	1.19e-07	0.00122	GAGAGAGAGAGAGAGAGAGA
AT2G01570	RGA	GRAS	PeNAC023	750	769	-	18.1286	1.19e-07	0.00122	GAGAGAGAGAGAGAGAGAGA
AT2G01570	RGA	GRAS	PeNAC023	752	771	-	18.1286	1.19e-07	0.00122	GAGAGAGAGAGAGAGAGAGA
AT2G01570	RGA	GRAS	PeNAC021	835	854	-	18.1286	1.19e-07	0.00122	GAGAGAGAGAGAGAGAGAGA
AT2G01570	RGA	GRAS	PeNAC007	870	889	-	18.1286	1.19e-07	0.00122	GAGAGAGAGAGAGAGAGAGA
AT2G01930	BPC1	BBR-BPC	PeNAC029	944	967	-	15.9375	1.19e-07	0.00018	GGATGAGAGAGAGAGAAAGCAAGG
AT5G01380	GT-3A	Trihelix	PeNAC073	721	737	-	18.25	1.19e-07	0.0245	GACACGTGGTGAACGTG
AT1G19040	AT1G19040	NAC	PeNAC011	617	632	-	19.8438	1.2e-07	0.0054	TAACTTGGAACCCAAG
AT4G30980	LRL2	bHLH	PeNAC094	489	503	-	20.186	1.2e-07	0.0112	CGTGCTGGACACGTG
AT2G45660	SOC1	MIKC_MADS	PeNAC061	638	658	+	18.0725	1.21e-07	0.00028	ttcttttttcttttttttttt
AT4G38000	DOF4.7	Dof	PeNAC065	205	232	+	18.1875	1.21e-07	0.00124	ctctttttttttttgtttttcttttttt
AT3G23220	ERF095	ERF	PeNAC023	522	536	-	19.9688	1.22e-07	0.0197	CCAAGGCGGCGGCTG
AT5G17430	BBM	AP2	PeNAC062	255	274	+	18.6456	1.22e-07	0.00045	agaaaagaagagaaaagaag
AT1G69010	BIM2	bHLH	PeNAC083	429	443	-	19.5625	1.23e-07	0.0124	CACGTGCCATACACA
AT2G45660	SOC1	MIKC_MADS	PeNAC024	195	215	+	18.058	1.23e-07	0.00028	tcttttctttttttttttttt
AT1G43160	RAP2-6	ERF	PeNAC103	485	499	+	19.8906	1.24e-07	0.0157	gtacggcggaggagg
AT2G40340	DREB2C	ERF	PeNAC019	650	670	+	19.4559	1.24e-07	0.0031	ggtggtggggctgtaggcggt
AT2G40340	DREB2C	ERF	PeNAC017	650	670	+	19.4559	1.24e-07	0.0031	ggtggtggggctgtaggcggt
AT1G72050	TFIIIA	C2H2	PeNAC044	953	971	+	19.4454	1.24e-07	0.00265	cctctctctcattctcctc
AT5G47220	ERF2	ERF	PeNAC103	485	505	-	19.7656	1.24e-07	0.00617	GCTACGCCTCCTCCGCCGTAC
AT2G01930	BPC1	BBR-BPC	PeNAC101	495	518	+	15.8438	1.24e-07	0.00019	gggagaggaaggaagagggagata
AT5G52020	ERF025	ERF	PeNAC016	324	338	-	18.3594	1.24e-07	0.0123	CTGTGTCGGCGGTGC
AT5G52020	ERF025	ERF	PeNAC015	694	708	-	18.3594	1.24e-07	0.0123	CTGTGTCGGCGGTGC
AT4G38000	DOF4.7	Dof	PeNAC083	493	520	-	18.1562	1.25e-07	0.00124	TTTTTTCTTTTTCTTTTTCTTTTTTTTT
AT3G55370	OBP3	Dof	PeNAC055	213	233	+	17.7812	1.26e-07	0.00168	gtctcttttctcttttttttt
AT1G49720	ABF1	bZIP	PeNAC014	802	820	-	19.6628	1.26e-07	0.0119	GGACACGTGGCGGAGGATT
AT1G28370	ERF11	ERF	PeNAC023	519	533	+	19.9062	1.27e-07	0.0196	caccagccgccgcct
AT5G23280	TCP7	TCP	PeNAC023	213	223	-	20.3438	1.27e-07	0.0251	GTGGGCCCCGC
AT1G68550	ERF118	ERF	PeNAC103	485	499	-	19.8594	1.27e-07	0.0121	CCTCCTCCGCCGTAC
AT5G42520	BPC6	BBR-BPC	PeNAC058	538	558	+	16.0137	1.28e-07	0.00021	ctctctctctctcccacaata
AT2G45660	SOC1	MIKC_MADS	PeNAC086	809	829	-	18.029	1.29e-07	0.00029	TGTCTTTTTTTTTTTTTTTTG
AT2G45660	SOC1	MIKC_MADS	PeNAC024	201	221	+	18.029	1.29e-07	0.00029	ctttttttttttttttttttg
AT5G02460	DOF5.1	Dof	PeNAC021	32	52	-	17.8125	1.29e-07	0.00216	GGAAAAGAAAACAGAAAAAGA
AT1G28160	ERF087	ERF	PeNAC023	519	533	-	19.9375	1.29e-07	0.0221	AGGCGGCGGCTGGTG
AT5G47230	ERF5	ERF	PeNAC023	519	533	+	19.6562	1.3e-07	0.0124	caccagccgccgcct
AT1G74480	RKD2	Nin-like	PeNAC091	828	846	+	19.6875	1.31e-07	0.0262	gtgacttttcgccttctta
AT4G38910	BPC5	BBR-BPC	PeNAC095	426	455	-	-15.1899	1.31e-07	0.00023	GAAGGAAGGGAGAGAGGAAAAGAGAGAACT
AT1G19040	AT1G19040	NAC	PeNAC097	608	623	+	19.7656	1.31e-07	0.0054	aaacttgggtcccaag
AT1G19040	AT1G19040	NAC	PeNAC099	613	628	+	19.7656	1.31e-07	0.0054	aaacttgggtcccaag
AT1G19040	AT1G19040	NAC	PeNAC012	614	629	+	19.7656	1.31e-07	0.0054	aaacttgggtcccaag
AT1G19040	AT1G19040	NAC	PeNAC013	614	629	+	19.7656	1.31e-07	0.0054	aaacttgggtcccaag
AT2G33710	AT2G33710	ERF	PeNAC023	519	533	+	19.8438	1.32e-07	0.0247	caccagccgccgcct
AT2G01570	RGA	GRAS	PeNAC074	558	577	-	18.0429	1.32e-07	0.00129	CAGAGAGAGAGAGAGAGAGA
AT2G45660	SOC1	MIKC_MADS	PeNAC065	210	230	+	18.0145	1.32e-07	0.00029	tttttttttgtttttcttttt
AT2G45660	SOC1	MIKC_MADS	PeNAC057	224	244	+	18.0145	1.32e-07	0.00029	tctctatctctctctctctct
AT2G45660	SOC1	MIKC_MADS	PeNAC058	527	547	+	18.0145	1.32e-07	0.00029	tctctatctctctctctctct
AT1G53170	ERF8	ERF	PeNAC023	518	532	+	19.8594	1.32e-07	0.013	tcaccagccgccgcc
AT5G17430	BBM	AP2	PeNAC078	87	106	-	18.5823	1.32e-07	0.00046	TAAAAAAAAAAAAAAAGAAA
AT5G17430	BBM	AP2	PeNAC024	191	210	-	18.5823	1.32e-07	0.00046	AAAAAAAAAGAAAAGAAAAA
AT3G22780	TSO1	CPP	PeNAC063	31	45	-	17.2877	1.33e-07	0.0137	AATTTAAAATTTAAA
AT3G22780	TSO1	CPP	PeNAC078	320	334	-	17.2877	1.33e-07	0.0137	AATTTAAAATTTAAA
AT3G57600	DREB2F	ERF	PeNAC023	522	532	+	19.6719	1.34e-07	0.0134	cagccgccgcc
AT5G17430	BBM	AP2	PeNAC072	557	576	-	18.5696	1.34e-07	0.00046	AGAGAGAAAAGAGAGAGAGA
AT4G38910	BPC5	BBR-BPC	PeNAC074	526	555	-	-15.3165	1.35e-07	0.00023	AGAGAGAGAGAGAGAGACTAAGGTTTCTAG
AT3G46070	AT3G46070	C2H2	PeNAC006	708	722	-	17.0822	1.35e-07	0.0139	CCATTCTCACTCTCT
AT1G32870	ANAC13	NAC	PeNAC007	586	601	+	19.7344	1.35e-07	0.0139	cttggcaagcaagtca
AT1G32870	ANAC13	NAC	PeNAC008	592	607	+	19.7344	1.35e-07	0.0139	cttggcaagcaagtca
AT2G45660	SOC1	MIKC_MADS	PeNAC072	560	580	+	18	1.35e-07	0.00029	ctctctcttttctctctctct
AT1G49480	REM19	B3	PeNAC104	350	364	-	18.0735	1.35e-07	0.00139	GCAAAAAAAAAAAAA
AT5G04390	AT5G04390	C2H2	PeNAC093	966	976	-	14.0625	1.36e-07	0.0281	GAGTGAAGGTG
AT5G17430	BBM	AP2	PeNAC095	429	448	-	18.557	1.36e-07	0.00046	GGGAGAGAGGAAAAGAGAGA
AT3G55370	OBP3	Dof	PeNAC094	276	296	-	17.7188	1.38e-07	0.00171	TTTCCTTTTTTTTTTTGCTTT
AT2G45660	SOC1	MIKC_MADS	PeNAC034	694	714	+	17.9855	1.38e-07	0.00029	cgtttttttttttttttttct
AT2G45660	SOC1	MIKC_MADS	PeNAC034	706	726	+	17.9855	1.38e-07	0.00029	tttttttctttctcgctttcc
AT4G36730	GBF1	bZIP	PeNAC077	567	576	+	16.0105	1.38e-07	0.027	ccacgtggcc
AT2G17180	ZAT2	C2H2	PeNAC081	658	667	+	17.2381	1.38e-07	0.0271	cccagctggc
AT5G62940	DOF5.6	Dof	PeNAC094	354	374	-	16.8125	1.38e-07	0.00575	AAAAAAGAGAAAAAGAAAAGA
AT5G17430	BBM	AP2	PeNAC095	431	450	-	18.5443	1.38e-07	0.00046	AAGGGAGAGAGGAAAAGAGA
AT5G51910	TCP19	TCP	PeNAC094	802	811	-	18.3298	1.39e-07	0.0132	GGGGGCCCAC
AT2G01570	RGA	GRAS	PeNAC021	831	850	-	18	1.39e-07	0.00129	GAGAGAGAGAGAGAGAGGGG
AT2G01930	BPC1	BBR-BPC	PeNAC082	896	919	+	15.5781	1.4e-07	0.00021	gaaagagggaaggagagaggaagg
AT4G38000	DOF4.7	Dof	PeNAC024	186	213	+	18.0625	1.4e-07	0.00131	ctctttttttcttttctttttttttttt
AT1G12630	ERF027	ERF	PeNAC073	805	825	+	19.1406	1.4e-07	0.0101	cacccgcaccatcaccgtcac
AT2G01930	BPC1	BBR-BPC	PeNAC060	761	784	-	15.5625	1.41e-07	0.00021	GAGGAGAGGAGAGGAAGAGAGAAG
AT4G17490	ERF6	ERF	PeNAC023	516	536	+	19.4688	1.41e-07	0.0257	cgtcaccagccgccgccttgg
AT2G01930	BPC1	BBR-BPC	PeNAC043	65	88	+	15.5469	1.42e-07	0.00021	gagagagagagagatgaaggctcg
AT1G72050	TFIIIA	C2H2	PeNAC063	904	922	+	19.2353	1.43e-07	0.00275	ccttctccttctcctcccg
AT3G10490	ANAC052	NAC	PeNAC011	613	632	+	19.5479	1.44e-07	0.0286	gttacttgggttccaagtta
AT2G01930	BPC1	BBR-BPC	PeNAC084	260	283	-	15.5156	1.44e-07	0.00021	TATATAGAAAAAGAGAGAGAGTGA
AT4G38910	BPC5	BBR-BPC	PeNAC021	818	847	-	-15.6835	1.46e-07	0.00025	AGAGAGAGAGAGAGGGGAAGGGCAGGGTAA
AT2G28810	DOF2.2	Dof	PeNAC072	842	862	+	17.1094	1.48e-07	0.00286	ttcccttttctttcctttttt
AT1G20640	NLP4	Nin-like	PeNAC066	983	997	+	17.7059	1.48e-07	0.00481	gcagcagcagcattg
AT2G01570	RGA	GRAS	PeNAC048	31	50	+	17.9429	1.49e-07	0.00132	gagagagggagagaaggaga
AT5G17430	BBM	AP2	PeNAC060	761	780	-	18.481	1.5e-07	0.00049	AGAGGAGAGGAAGAGAGAAG
AT5G42520	BPC6	BBR-BPC	PeNAC043	57	77	-	15.6438	1.5e-07	0.00024	CTCTCTCTCTCTCCCTATACA
AT2G18300	AT2G18300	bHLH	PeNAC085	748	759	-	18.2667	1.5e-07	0.0293	GGGGCACGTGGC
AT5G25190	ERF003	ERF	PeNAC103	479	497	+	19.5	1.51e-07	0.0097	cggtttgtacggcggagga
AT2G45660	SOC1	MIKC_MADS	PeNAC024	197	217	+	17.9275	1.51e-07	0.00031	ttttctttttttttttttttt
AT2G45660	SOC1	MIKC_MADS	PeNAC094	362	382	+	17.9275	1.51e-07	0.00031	ttttctcttttttttcttttt
AT2G45660	SOC1	MIKC_MADS	PeNAC044	964	984	+	17.9275	1.51e-07	0.00031	ttctcctctctctctctctcc
AT2G28810	DOF2.2	Dof	PeNAC022	688	708	+	17.0938	1.51e-07	0.00286	tttttttttcttttctttttg
AT1G51700	DOF1.7	Dof	PeNAC083	491	511	+	16.4844	1.51e-07	0.00532	aaaaaaaaaaagaaaaagaaa
AT1G22070	TGA3	bZIP	PeNAC002	229	242	+	20.125	1.52e-07	0.0156	gatgacgtcatcct
AT1G50640	ERF3	ERF	PeNAC023	519	533	-	19.6406	1.52e-07	0.0299	AGGCGGCGGCTGGTG
AT5G64060	anac103	NAC	PeNAC011	614	634	-	19.9062	1.52e-07	0.00622	AATAACTTGGAACCCAAGTAA
AT5G42520	BPC6	BBR-BPC	PeNAC095	224	244	+	15.6027	1.52e-07	0.00025	cctgttttctctctttctctc
AT5G42520	BPC6	BBR-BPC	PeNAC023	739	759	+	15.6027	1.52e-07	0.00025	ttccctgtcgctctctctctc
AT5G06960	TGA5	bZIP	PeNAC002	229	242	+	20.25	1.52e-07	0.0157	gatgacgtcatcct
AT5G62940	DOF5.6	Dof	PeNAC072	850	870	-	16.75	1.54e-07	0.00575	GAGAGAAAAAAAAAGGAAAGA
AT4G38910	BPC5	BBR-BPC	PeNAC041	545	574	-	-15.9494	1.54e-07	0.00026	GACGAGAGGGAGAAAGCAACACAAACAGAG
AT5G61600	ERF104	ERF	PeNAC023	514	532	+	19.4375	1.54e-07	0.01	tccgtcaccagccgccgcc
AT2G45660	SOC1	MIKC_MADS	PeNAC024	185	205	+	17.913	1.54e-07	0.00031	tctctttttttcttttctttt
AT2G45660	SOC1	MIKC_MADS	PeNAC074	848	868	+	17.913	1.54e-07	0.00031	tttccttcttttttttttttt
AT5G42520	BPC6	BBR-BPC	PeNAC102	821	841	+	15.5616	1.55e-07	0.00025	tctcctctctctctctctatt
AT3G11020	DREB2B	ERF	PeNAC056	547	567	-	19.125	1.55e-07	0.0299	CCCGTAAGGCGGTGGCTGTAG
AT5G63090	LOB	LBD	PeNAC103	486	506	-	18.9844	1.55e-07	0.0218	CGCTACGCCTCCTCCGCCGTA
AT3G27010	TCP20	TCP	PeNAC101	667	687	-	19.6875	1.56e-07	0.00858	AGAGTGGACGGTGGGGACCAC
AT5G17430	BBM	AP2	PeNAC022	686	705	-	18.443	1.56e-07	0.00051	AAAGAAAAGAAAAAAAAAGA
AT4G38910	BPC5	BBR-BPC	PeNAC087	611	640	+	-16.0127	1.56e-07	0.00026	gaacagtgagagagagagagaggggctatg
AT5G44210	ERF9	ERF	PeNAC089	579	599	-	19.1094	1.57e-07	0.0103	TGATGGTGGTGGTGGTGGTGG
AT1G12630	ERF027	ERF	PeNAC041	146	166	+	19.0312	1.57e-07	0.0101	tgcctctgacttcgccgtcaa
AT3G50410	DOF3.4	Dof	PeNAC083	503	523	-	16.4531	1.58e-07	0.004	TCTTTTTTTCTTTTTCTTTTT
AT3G50410	DOF3.4	Dof	PeNAC031	751	771	-	16.4531	1.58e-07	0.004	CTCTTTCCATTTTTACTTTTT
AT5G44210	ERF9	ERF	PeNAC089	582	602	-	19.0938	1.58e-07	0.0103	TGGTGATGGTGGTGGTGGTGG
AT1G77200	ERF037	ERF	PeNAC015	697	710	+	18.9375	1.59e-07	0.031	ccgccgacacagtt
AT1G75490	DREB2D	ERF	PeNAC014	476	490	+	19.5156	1.6e-07	0.00551	cctcctccaccgttt
AT4G38910	BPC5	BBR-BPC	PeNAC082	899	928	+	-16.0886	1.6e-07	0.00027	agagggaaggagagaggaaggctgagaaac
AT1G51700	DOF1.7	Dof	PeNAC061	638	658	-	16.4531	1.6e-07	0.00532	AAAAAAAAAAAGAAAAAAGAA
AT2G01930	BPC1	BBR-BPC	PeNAC044	962	985	-	15.2656	1.61e-07	0.00024	TGGAGAGAGAGAGAGAGGAGAATG
AT5G42520	BPC6	BBR-BPC	PeNAC074	542	562	+	15.4795	1.61e-07	0.00025	ctctctctctctctcttctct
AT5G02460	DOF5.1	Dof	PeNAC041	718	738	-	17.6562	1.61e-07	0.00249	CAAAAAGGAGGAAAAAAAAAA
AT4G38000	DOF4.7	Dof	PeNAC083	490	517	-	17.9375	1.61e-07	0.00145	TTTCTTTTTCTTTTTCTTTTTTTTTTTA
AT4G38910	BPC5	BBR-BPC	PeNAC021	836	865	-	-16.1519	1.62e-07	0.00027	GCTAGCATGAAGAGAGAGAGAGAGAGAGAG
AT1G43160	RAP2-6	ERF	PeNAC023	519	533	-	19.5	1.63e-07	0.0157	AGGCGGCGGCTGGTG
AT2G01930	BPC1	BBR-BPC	PeNAC044	949	972	-	15.2188	1.64e-07	0.00024	AGAGGAGAATGAGAGAGAGGGAGA
AT2G28810	DOF2.2	Dof	PeNAC094	354	374	+	17.0312	1.66e-07	0.00286	tcttttctttttctctttttt
AT2G37590	DOF2.4	Dof	PeNAC004	680	694	-	15.9375	1.67e-07	0.0342	CTTTTTAACTTTTTC
AT2G20180	PIF1	bHLH	PeNAC014	811	824	-	18.5342	1.68e-07	0.0153	TTGGGGACACGTGG
AT4G01680	MYB55	MYB	PeNAC089	576	589	+	18.375	1.68e-07	0.00914	ccaccaccaccacc
AT4G01680	MYB55	MYB	PeNAC089	579	592	+	18.375	1.68e-07	0.00914	ccaccaccaccacc
AT4G01680	MYB55	MYB	PeNAC089	582	595	+	18.375	1.68e-07	0.00914	ccaccaccaccacc
AT5G42520	BPC6	BBR-BPC	PeNAC022	301	321	+	15.3699	1.68e-07	0.00026	ctctctctctctatatatata
AT5G42520	BPC6	BBR-BPC	PeNAC015	381	401	-	15.3699	1.68e-07	0.00026	CTCTCTCTCTCTATATATATA
AT1G75490	DREB2D	ERF	PeNAC023	519	533	+	19.4375	1.69e-07	0.00551	caccagccgccgcct
AT5G25390	SHN3	ERF	PeNAC053	760	780	-	17.7536	1.69e-07	0.00477	GGCACCACAGCCGGCTCCGTC
AT4G21030	DOF4.2	Dof	PeNAC094	282	300	+	17.3594	1.69e-07	0.0345	aaaaaaaaaaggaaaaaaa
AT4G38910	BPC5	BBR-BPC	PeNAC043	56	85	+	-16.3671	1.7e-07	0.00028	atgtatagggagagagagagagatgaaggc
AT2G28810	DOF2.2	Dof	PeNAC094	273	293	-	17.0156	1.7e-07	0.00286	CCTTTTTTTTTTTGCTTTTCG
AT4G38910	BPC5	BBR-BPC	PeNAC025	700	729	-	-16.3924	1.71e-07	0.00028	ACAGAGATAGAGAGAGAGAGATTGGACCTG
AT2G31220	BHLH10	bHLH	PeNAC015	697	710	-	18.7969	1.71e-07	0.0304	AACTGTGTCGGCGG
AT5G17430	BBM	AP2	PeNAC060	763	782	-	18.3671	1.71e-07	0.00055	GGAGAGGAGAGGAAGAGAGA
AT2G01930	BPC1	BBR-BPC	PeNAC021	821	844	-	15.1094	1.72e-07	0.00025	GAGAGAGAGAGGGGAAGGGCAGGG
AT2G45660	SOC1	MIKC_MADS	PeNAC024	199	219	+	17.8406	1.72e-07	0.00034	ttctttttttttttttttttt
AT3G55370	OBP3	Dof	PeNAC102	233	253	-	17.5469	1.73e-07	0.00202	TTTCCTTTTTCTTTTTATTTC
AT1G35560	TCP23	TCP	PeNAC094	801	810	-	19.4569	1.73e-07	0.0162	GGGGCCCACT
AT3G21175	GATA24	GATA	PeNAC027	523	537	+	18.3281	1.73e-07	0.0119	tcaccttcatcatca
AT5G47220	ERF2	ERF	PeNAC023	513	533	+	19.25	1.74e-07	0.00694	ttccgtcaccagccgccgcct
AT3G27010	TCP20	TCP	PeNAC023	203	223	+	19.5312	1.74e-07	0.00858	ctacacataggcggggcccac
AT2G01930	BPC1	BBR-BPC	PeNAC094	421	444	-	15.0781	1.74e-07	0.00025	ATGGGAATGGGAGAGGGAGAGAGA
AT5G62940	DOF5.6	Dof	PeNAC061	634	654	-	16.6719	1.75e-07	0.00575	AAAAAAAGAAAAAAGAAGAAA
AT2G45660	SOC1	MIKC_MADS	PeNAC029	944	964	+	17.8261	1.76e-07	0.00034	ccttgctttctctctctctca
AT5G17430	BBM	AP2	PeNAC022	617	636	-	18.3418	1.76e-07	0.00055	AAAAAAAAGAAGAAAAAAGA
AT4G30980	LRL2	bHLH	PeNAC023	260	274	+	19.6628	1.77e-07	0.0112	cctgcttgccacgtg
AT2G01570	RGA	GRAS	PeNAC021	829	848	-	17.8	1.77e-07	0.0015	GAGAGAGAGAGAGAGGGGAA
AT1G08810	MYB60	MYB	PeNAC081	829	847	+	18.2656	1.77e-07	0.0181	cttcctcacccaccttgtc
AT4G15090	FAR1	FAR1	PeNAC019	261	275	+	19.75	1.78e-07	0.0169	cgctcacgcgcttca
AT2G20180	PIF1	bHLH	PeNAC101	696	709	-	18.4932	1.78e-07	0.0153	AGGACGACACGTGC
AT3G27010	TCP20	TCP	PeNAC091	309	329	+	19.5	1.78e-07	0.00858	atcgggaccagttggacccac
AT3G02150	TCP13	TCP	PeNAC073	670	682	-	19.8356	1.79e-07	0.0115	GTGGGGACCAGAA
AT5G19790	RAP2-11	ERF	PeNAC026	472	486	-	19.1562	1.79e-07	0.0324	TTGTGGCCGCCGGCG
AT5G17430	BBM	AP2	PeNAC083	496	515	+	18.3291	1.79e-07	0.00055	aaaaaagaaaaagaaaaaga
AT5G17430	BBM	AP2	PeNAC034	696	715	-	18.3291	1.79e-07	0.00055	AAGAAAAAAAAAAAAAAAAA
AT1G69570	CDF5	Dof	PeNAC022	612	638	+	18.2031	1.8e-07	0.00232	tgtactcttttttcttctttttttttc
AT5G17430	BBM	AP2	PeNAC061	634	653	-	18.3165	1.82e-07	0.00055	AAAAAAGAAAAAAGAAGAAA
AT2G45660	SOC1	MIKC_MADS	PeNAC018	979	999	+	17.7971	1.83e-07	0.00035	gctctctctctctctctctca
AT4G01680	MYB55	MYB	PeNAC065	653	666	-	18.3125	1.84e-07	0.00914	TCACACCCACCATC
AT5G42520	BPC6	BBR-BPC	PeNAC018	974	994	+	15.137	1.85e-07	0.00029	gctctgctctctctctctctc
AT2G35530	BZIP16	bZIP	PeNAC001	526	540	+	19.8281	1.86e-07	0.016	catgatgacgtggca
AT1G09540	MYB61	MYB	PeNAC065	651	665	-	17.5156	1.86e-07	0.038	CACACCCACCATCCC
AT2G35700	ERF038	ERF	PeNAC019	233	247	-	18.8906	1.86e-07	0.0227	CGTCGGTGCCGATGG
AT4G38910	BPC5	BBR-BPC	PeNAC095	430	459	-	-16.8481	1.87e-07	0.0003	GGAAGAAGGAAGGGAGAGAGGAAAAGAGAG
AT2G45660	SOC1	MIKC_MADS	PeNAC065	208	228	+	17.7826	1.87e-07	0.00036	tttttttttttgtttttcttt
AT5G46590	anac096	NAC	PeNAC043	8	23	-	18.4375	1.87e-07	0.0193	CTTGGGGTTGAAGAAA
AT4G38910	BPC5	BBR-BPC	PeNAC023	735	764	-	-16.8608	1.88e-07	0.0003	AGAGAGAGAGAGAGAGCGACAGGGAAGTGA
AT2G01930	BPC1	BBR-BPC	PeNAC074	854	877	-	14.8906	1.89e-07	0.00027	TAGAGAGAGAAAAAAAAAAAAAGA
AT3G50410	DOF3.4	Dof	PeNAC094	362	382	+	16.3438	1.91e-07	0.004	ttttctcttttttttcttttt
AT3G50410	DOF3.4	Dof	PeNAC094	287	307	-	16.3438	1.91e-07	0.004	TGCACCTTTTTTTTCCTTTTT
AT1G71450	ERF021	ERF	PeNAC014	468	487	+	18.875	1.91e-07	0.00419	cgtgtccacctcctccaccg
AT5G49300	GATA16	GATA	PeNAC073	805	831	+	13.2874	1.92e-07	0.00975	cacccgcaccatcaccgtcaccatcac
AT5G60130	AT5G60130	B3	PeNAC074	803	821	-	18.3438	1.92e-07	0.0131	AAGCAAAGCAAAAGCAAAT
AT5G60130	AT5G60130	B3	PeNAC072	807	825	-	18.3438	1.92e-07	0.0131	AAGCAAAGCAAAAGCAAAT
AT2G01570	RGA	GRAS	PeNAC044	964	983	-	17.7286	1.93e-07	0.00153	GAGAGAGAGAGAGAGGAGAA
AT5G42520	BPC6	BBR-BPC	PeNAC048	25	45	-	15.0411	1.93e-07	0.0003	TTCTCTCCCTCTCTCTGTGTC
AT1G20640	NLP4	Nin-like	PeNAC057	325	339	+	17.5147	1.95e-07	0.00481	gcagcagcagcagat
AT1G20640	NLP4	Nin-like	PeNAC058	628	642	+	17.5147	1.95e-07	0.00481	gcagcagcagcagat
AT2G45660	SOC1	MIKC_MADS	PeNAC034	351	371	-	17.7536	1.95e-07	0.00037	GTTTCCTCTCTCTCTTTTTTT
AT4G16750	ERF039	ERF	PeNAC016	322	336	+	18.7031	1.96e-07	0.0189	gtgcaccgccgacac
AT4G16750	ERF039	ERF	PeNAC015	692	706	+	18.7031	1.96e-07	0.0189	gtgcaccgccgacac
AT1G49720	ABF1	bZIP	PeNAC056	309	327	+	18.8256	1.96e-07	0.0123	ttcgacgtggcatggcccg
AT2G01570	RGA	GRAS	PeNAC007	866	885	-	17.7143	1.96e-07	0.00153	GAGAGAGAGAGAGAGAAGGA
AT4G38910	BPC5	BBR-BPC	PeNAC095	440	469	-	-17.0506	1.96e-07	0.00031	AGAGGGAGATGGAAGAAGGAAGGGAGAGAG
AT1G44830	ERF014	ERF	PeNAC056	547	561	+	19.3281	1.98e-07	0.00868	ctacagccaccgcct
AT5G67190	ERF010	ERF	PeNAC019	233	247	+	19.0781	1.98e-07	0.0211	ccatcggcaccgacg
AT5G62940	DOF5.6	Dof	PeNAC011	332	352	+	16.5938	1.98e-07	0.00575	gaaggaaagaaaaagaaaaga
AT1G69570	CDF5	Dof	PeNAC021	27	53	+	18.1094	1.98e-07	0.00232	ttttttctttttctgttttcttttcca
AT1G69570	CDF5	Dof	PeNAC102	229	255	-	18.1094	1.98e-07	0.00232	ATTTTCCTTTTTCTTTTTATTTCTCTG
AT2G45660	SOC1	MIKC_MADS	PeNAC074	858	878	+	17.7391	1.99e-07	0.00037	tttttttttttctctctctat
AT3G23210	BHLH34	bHLH	PeNAC014	728	750	+	18.8125	2e-07	0.0144	acgcttgccacgtgtccccagca
AT4G25480	DREB1A	ERF	PeNAC016	325	338	+	17.4531	2.01e-07	0.0201	caccgccgacacag
AT4G25480	DREB1A	ERF	PeNAC015	695	708	+	17.4531	2.01e-07	0.0201	caccgccgacacag
AT3G50410	DOF3.4	Dof	PeNAC004	681	701	-	16.3125	2.01e-07	0.004	TGTCTCTCTTTTTAACTTTTT
AT1G49480	REM19	B3	PeNAC102	167	181	+	17.9853	2.02e-07	0.00139	aaaaaaaaaaaaaaa
AT1G49480	REM19	B3	PeNAC102	168	182	+	17.9853	2.02e-07	0.00139	aaaaaaaaaaaaaaa
AT1G49480	REM19	B3	PeNAC102	169	183	+	17.9853	2.02e-07	0.00139	aaaaaaaaaaaaaaa
AT1G49480	REM19	B3	PeNAC102	170	184	+	17.9853	2.02e-07	0.00139	aaaaaaaaaaaaaaa
AT1G49480	REM19	B3	PeNAC102	171	185	+	17.9853	2.02e-07	0.00139	aaaaaaaaaaaaaaa
AT1G49480	REM19	B3	PeNAC102	172	186	+	17.9853	2.02e-07	0.00139	aaaaaaaaaaaaaaa
AT1G49480	REM19	B3	PeNAC102	173	187	+	17.9853	2.02e-07	0.00139	aaaaaaaaaaaaaaa
AT1G49480	REM19	B3	PeNAC086	810	824	+	17.9853	2.02e-07	0.00139	aaaaaaaaaaaaaaa
AT1G49480	REM19	B3	PeNAC086	811	825	+	17.9853	2.02e-07	0.00139	aaaaaaaaaaaaaaa
AT1G49480	REM19	B3	PeNAC078	91	105	-	17.9853	2.02e-07	0.00139	AAAAAAAAAAAAAAA
AT1G49480	REM19	B3	PeNAC024	202	216	-	17.9853	2.02e-07	0.00139	AAAAAAAAAAAAAAA
AT1G49480	REM19	B3	PeNAC024	203	217	-	17.9853	2.02e-07	0.00139	AAAAAAAAAAAAAAA
AT1G49480	REM19	B3	PeNAC024	204	218	-	17.9853	2.02e-07	0.00139	AAAAAAAAAAAAAAA
AT1G49480	REM19	B3	PeNAC024	205	219	-	17.9853	2.02e-07	0.00139	AAAAAAAAAAAAAAA
AT1G49480	REM19	B3	PeNAC024	206	220	-	17.9853	2.02e-07	0.00139	AAAAAAAAAAAAAAA
AT1G49480	REM19	B3	PeNAC104	346	360	-	17.9853	2.02e-07	0.00139	AAAAAAAAAAAAAAA
AT1G49480	REM19	B3	PeNAC104	347	361	-	17.9853	2.02e-07	0.00139	AAAAAAAAAAAAAAA
AT1G49480	REM19	B3	PeNAC104	348	362	-	17.9853	2.02e-07	0.00139	AAAAAAAAAAAAAAA
AT1G49480	REM19	B3	PeNAC101	621	635	-	17.9853	2.02e-07	0.00139	AAAAAAAAAAAAAAA
AT1G49480	REM19	B3	PeNAC101	622	636	-	17.9853	2.02e-07	0.00139	AAAAAAAAAAAAAAA
AT1G49480	REM19	B3	PeNAC034	696	710	-	17.9853	2.02e-07	0.00139	AAAAAAAAAAAAAAA
AT1G49480	REM19	B3	PeNAC034	697	711	-	17.9853	2.02e-07	0.00139	AAAAAAAAAAAAAAA
AT1G49480	REM19	B3	PeNAC034	698	712	-	17.9853	2.02e-07	0.00139	AAAAAAAAAAAAAAA
AT2G45660	SOC1	MIKC_MADS	PeNAC095	427	447	+	17.7246	2.03e-07	0.00038	gttctctcttttcctctctcc
AT3G23220	ERF095	ERF	PeNAC023	519	533	-	19.1875	2.04e-07	0.0197	AGGCGGCGGCTGGTG
AT4G38910	BPC5	BBR-BPC	PeNAC021	820	849	-	-17.2532	2.05e-07	0.00032	AGAGAGAGAGAGAGAGGGGAAGGGCAGGGT
AT2G21230	AT2G21230	bZIP	PeNAC081	659	668	-	16.7447	2.06e-07	0.0421	TGCCAGCTGG
AT4G38910	BPC5	BBR-BPC	PeNAC022	299	328	-	-17.2911	2.07e-07	0.00032	ATATATATATATATATAGAGAGAGAGAGAG
AT1G28370	ERF11	ERF	PeNAC103	485	499	-	19.2188	2.07e-07	0.0196	CCTCCTCCGCCGTAC
AT4G14410	BHLH104	bHLH	PeNAC085	748	757	+	19.2167	2.07e-07	0.0208	gccacgtgcc
AT4G14410	BHLH104	bHLH	PeNAC085	748	757	-	19.2167	2.07e-07	0.0208	GGCACGTGGC
AT5G02460	DOF5.1	Dof	PeNAC072	842	862	-	17.4688	2.07e-07	0.00297	AAAAAAGGAAAGAAAAGGGAA
AT2G45660	SOC1	MIKC_MADS	PeNAC007	862	882	+	17.7101	2.08e-07	0.00038	tctgtccttctctctctctct
AT2G45660	SOC1	MIKC_MADS	PeNAC008	868	888	+	17.7101	2.08e-07	0.00038	tctgtccttctctctctctct
AT4G18390	TCP2	TCP	PeNAC094	802	811	+	16.3404	2.09e-07	0.0203	gtgggccccc
AT4G18390	TCP2	TCP	PeNAC094	802	811	-	16.3404	2.09e-07	0.0203	GGGGGCCCAC
AT3G50260	ERF011	ERF	PeNAC019	233	247	+	19.0781	2.09e-07	0.0144	ccatcggcaccgacg
AT4G38910	BPC5	BBR-BPC	PeNAC007	845	874	-	-17.3418	2.09e-07	0.00032	AGAGAAGGACAGAGAGAGGGATTTGGGGAT
AT4G38910	BPC5	BBR-BPC	PeNAC008	851	880	-	-17.3418	2.09e-07	0.00032	AGAGAAGGACAGAGAGAGGGATTTGGGGAT
AT4G27950	CRF4	ERF	PeNAC089	573	593	+	18.4118	2.12e-07	0.0082	taaccaccaccaccaccacca
AT1G51600	GATA28	GATA	PeNAC089	583	601	+	17.589	2.15e-07	0.0085	caccaccaccaccatcacc
AT1G44830	ERF014	ERF	PeNAC019	233	247	+	19.2188	2.16e-07	0.00868	ccatcggcaccgacg
AT3G55370	OBP3	Dof	PeNAC032	693	713	+	17.375	2.16e-07	0.00239	ctctctttttattttttttct
AT3G26790	FUS3	B3	PeNAC065	264	278	-	17.6875	2.18e-07	0.0291	AAACGCATGCATGCC
AT2G28810	DOF2.2	Dof	PeNAC061	633	653	+	16.8438	2.19e-07	0.00339	ttttcttcttttttctttttt
AT2G45650	AGL6	MIKC_MADS	PeNAC051	209	227	-	19.0156	2.2e-07	0.0451	TTGCCAAAATGGGAAAAAT
AT3G10800	BZIP28	bZIP	PeNAC014	733	747	-	18.7812	2.2e-07	0.0226	TGGGGACACGTGGCA
AT2G01930	BPC1	BBR-BPC	PeNAC087	620	643	+	14.5469	2.2e-07	0.00031	gagagagagagaggggctatgacc
AT5G17430	BBM	AP2	PeNAC024	200	219	-	18.1519	2.21e-07	0.00064	AAAAAAAAAAAAAAAAAAGA
AT5G17430	BBM	AP2	PeNAC030	970	989	+	18.1519	2.21e-07	0.00064	aaggaaaagaagaaaaaaag
AT3G24050	GATA1	GATA	PeNAC027	524	538	-	18.7206	2.23e-07	0.00353	ATGATGATGAAGGTG
AT5G65130	AT5G65130	ERF	PeNAC023	519	533	+	18.9844	2.24e-07	0.0108	caccagccgccgcct
AT4G01680	MYB55	MYB	PeNAC055	609	622	-	18.1406	2.24e-07	0.00914	ACCCCCCCACCACC
AT5G17430	BBM	AP2	PeNAC042	689	708	-	18.1392	2.24e-07	0.00064	AAGAAAGAAAAAACGAAAGG
AT5G02460	DOF5.1	Dof	PeNAC102	237	257	+	17.4062	2.26e-07	0.00302	taaaaagaaaaaggaaaatga
AT1G69570	CDF5	Dof	PeNAC032	691	717	+	17.9844	2.26e-07	0.0025	atctctctttttattttttttctttta
AT2G01930	BPC1	BBR-BPC	PeNAC101	497	520	+	14.4844	2.26e-07	0.00032	gagaggaaggaagagggagatagg
AT1G34670	AtMYB93	MYB	PeNAC033	608	628	+	17.2812	2.27e-07	0.0463	tgggtgaaggtggttggacag
AT5G42520	BPC6	BBR-BPC	PeNAC094	412	432	+	14.6301	2.29e-07	0.00035	ttcctccactctctctccctc
AT5G08070	TCP17	TCP	PeNAC073	672	682	+	19.4658	2.29e-07	0.0129	ctggtccccac
AT2G20180	PIF1	bHLH	PeNAC014	735	748	-	18.3014	2.29e-07	0.0153	CTGGGGACACGTGG
AT3G20310	ERF7	ERF	PeNAC089	573	593	+	18.75	2.3e-07	0.00875	taaccaccaccaccaccacca
AT5G17430	BBM	AP2	PeNAC078	77	96	-	18.1139	2.31e-07	0.00064	AAAAAAGAAAGAAAGAAACG
AT5G17430	BBM	AP2	PeNAC074	558	577	-	18.1139	2.31e-07	0.00064	CAGAGAGAGAGAGAGAGAGA
AT3G02150	TCP13	TCP	PeNAC023	213	225	+	19.5479	2.31e-07	0.0115	gcggggcccacct
AT1G21910	ERF012	ERF	PeNAC089	579	598	+	19.1094	2.31e-07	0.0151	ccaccaccaccaccaccatc
AT2G01570	RGA	GRAS	PeNAC074	556	575	-	17.5714	2.32e-07	0.00158	GAGAGAGAGAGAGAGAGAAG
AT2G01570	RGA	GRAS	PeNAC007	868	887	-	17.5714	2.32e-07	0.00158	GAGAGAGAGAGAGAGAGAAG
AT5G06839	TGA10	bZIP	PeNAC002	229	243	-	19.3281	2.33e-07	0.024	AAGGATGACGTCATC
AT4G38000	DOF4.7	Dof	PeNAC021	25	52	+	17.6094	2.33e-07	0.002	aattttttctttttctgttttcttttcc
AT1G28160	ERF087	ERF	PeNAC103	485	499	+	19.0938	2.34e-07	0.0221	gtacggcggaggagg
AT2G45660	SOC1	MIKC_MADS	PeNAC065	214	234	+	17.6232	2.35e-07	0.00042	tttttgtttttctttttttcc
AT2G45660	SOC1	MIKC_MADS	PeNAC055	217	237	+	17.6232	2.35e-07	0.00042	cttttctcttttttttttcct
AT2G45660	SOC1	MIKC_MADS	PeNAC011	331	351	-	17.6232	2.35e-07	0.00042	CTTTTCTTTTTCTTTCCTTCC
AT2G01930	BPC1	BBR-BPC	PeNAC095	223	246	-	14.375	2.37e-07	0.00033	GTGAGAGAAAGAGAGAAAACAGGC
AT5G66940	DOF5.8	Dof	PeNAC065	209	237	+	17.5469	2.38e-07	0.00337	ttttttttttgtttttctttttttcctgt
AT4G38910	BPC5	BBR-BPC	PeNAC025	698	727	-	-17.962	2.39e-07	0.00036	AGAGATAGAGAGAGAGAGATTGGACCTGTG
AT5G39760	ZHD10	ZF-HD	PeNAC022	888	909	+	15.8824	2.39e-07	0.0489	agtggtaattaattaattaatt
AT3G23210	BHLH34	bHLH	PeNAC059	949	971	-	18.625	2.4e-07	0.0144	GCGCAAGACACGTGTGGCTTGGT
AT2G31230	ERF15	ERF	PeNAC023	517	531	+	19.0938	2.42e-07	0.0241	gtcaccagccgccgc
AT1G72050	TFIIIA	C2H2	PeNAC061	414	432	+	18.4622	2.42e-07	0.00422	ccttcttttcctccacttc
AT5G51910	TCP19	TCP	PeNAC077	625	634	+	18.0851	2.43e-07	0.0154	cgggccccac
AT2G01570	RGA	GRAS	PeNAC104	664	683	-	17.5286	2.43e-07	0.00158	GGGAAAGGGAGAAAGAGGGG
AT2G01570	RGA	GRAS	PeNAC007	864	883	-	17.5286	2.43e-07	0.00158	GAGAGAGAGAGAGAAGGACA
AT2G01570	RGA	GRAS	PeNAC008	870	889	-	17.5286	2.43e-07	0.00158	GAGAGAGAGAGAGAAGGACA
AT2G01930	BPC1	BBR-BPC	PeNAC072	853	876	-	14.3125	2.44e-07	0.00034	AATAGAGAGAGAAAAAAAAAGGAA
AT5G60850	DOF5.4	Dof	PeNAC004	680	693	+	14.8125	2.44e-07	0.0502	gaaaaagttaaaaa
AT2G35530	BZIP16	bZIP	PeNAC014	809	823	-	19.4688	2.44e-07	0.016	TGGGGACACGTGGCG
AT5G17430	BBM	AP2	PeNAC102	167	186	+	18.0633	2.45e-07	0.00066	aaaaaaaaaaaaaaaaaaaa
AT5G17430	BBM	AP2	PeNAC102	168	187	+	18.0633	2.45e-07	0.00066	aaaaaaaaaaaaaaaaaaaa
AT2G45660	SOC1	MIKC_MADS	PeNAC020	281	301	-	17.5942	2.45e-07	0.00043	TTTTATTTTTTTTTTCTTTTT
AT5G47230	ERF5	ERF	PeNAC089	576	590	+	18.6719	2.47e-07	0.0124	ccaccaccaccacca
AT5G47230	ERF5	ERF	PeNAC089	579	593	+	18.6719	2.47e-07	0.0124	ccaccaccaccacca
AT5G47230	ERF5	ERF	PeNAC089	582	596	+	18.6719	2.47e-07	0.0124	ccaccaccaccacca
AT5G62940	DOF5.6	Dof	PeNAC094	278	298	+	16.4531	2.48e-07	0.00602	agcaaaaaaaaaaaggaaaaa
AT2G45680	TCP9	TCP	PeNAC023	212	232	-	18.3088	2.48e-07	0.0469	AAGCATTAGGTGGGCCCCGCC
AT1G06850	AtbZIP52	bZIP	PeNAC081	656	669	-	17.7812	2.49e-07	0.051	TTGCCAGCTGGGTG
AT2G40340	DREB2C	ERF	PeNAC053	760	780	+	18.3382	2.49e-07	0.00554	gacggagccggctgtggtgcc
AT2G04880	ZAP1	WRKY	PeNAC009	762	772	+	18.8953	2.49e-07	0.0512	ttgaccgagtc
AT1G51600	GATA28	GATA	PeNAC089	586	604	+	17.2877	2.5e-07	0.0085	caccaccaccatcaccatc
AT3G12250	TGA6	bZIP	PeNAC002	229	243	+	19.5469	2.52e-07	0.026	gatgacgtcatcctt
AT3G45150	TCP16	TCP	PeNAC063	332	342	-	19.4304	2.53e-07	0.0164	GTGGGGACCAC
AT3G45150	TCP16	TCP	PeNAC101	667	677	-	19.4304	2.53e-07	0.0164	GTGGGGACCAC
AT1G69570	CDF5	Dof	PeNAC094	283	309	-	17.875	2.53e-07	0.00266	TATGCACCTTTTTTTTCCTTTTTTTTT
AT5G42520	BPC6	BBR-BPC	PeNAC095	432	452	+	14.3836	2.54e-07	0.00038	ctcttttcctctctcccttcc
AT5G13910	LEP	ERF	PeNAC089	575	595	+	18.625	2.54e-07	0.0341	accaccaccaccaccaccacc
AT1G12630	ERF027	ERF	PeNAC016	316	336	+	18.5625	2.55e-07	0.0122	ttacacgtgcaccgccgacac
AT2G45660	SOC1	MIKC_MADS	PeNAC102	164	184	-	17.5652	2.55e-07	0.00044	TTTTTTTTTTTTTTTTTTCTG
AT2G45660	SOC1	MIKC_MADS	PeNAC059	803	823	-	17.5652	2.55e-07	0.00044	CTTTGCCTTTTCTTTTTTTTT
AT5G17430	BBM	AP2	PeNAC072	846	865	-	18.0253	2.55e-07	0.00068	AAAAAAAAAGGAAAGAAAAG
AT3G20840	PLT1	AP2	PeNAC085	541	559	+	18.6712	2.56e-07	0.0522	cgcaccaatcccgaggacg
AT5G02460	DOF5.1	Dof	PeNAC065	211	231	-	17.3125	2.56e-07	0.00309	AAAAAAGAAAAACAAAAAAAA
AT4G38910	BPC5	BBR-BPC	PeNAC007	849	878	-	-18.2785	2.57e-07	0.00039	AGAGAGAGAAGGACAGAGAGAGGGATTTGG
AT4G38910	BPC5	BBR-BPC	PeNAC008	855	884	-	-18.2785	2.57e-07	0.00039	AGAGAGAGAAGGACAGAGAGAGGGATTTGG
AT5G17430	BBM	AP2	PeNAC044	968	987	-	18.0127	2.59e-07	0.00068	GATGGAGAGAGAGAGAGAGG
AT3G22170	FHY3	FAR1	PeNAC019	263	274	+	18.2794	2.6e-07	0.0325	ctcacgcgcttc
AT5G42520	BPC6	BBR-BPC	PeNAC044	961	981	+	14.3151	2.61e-07	0.00039	tcattctcctctctctctctc
AT5G02460	DOF5.1	Dof	PeNAC031	750	770	+	17.2969	2.62e-07	0.00309	taaaaagtaaaaatggaaaga
AT1G32150	BZIP68	bZIP	PeNAC014	733	747	+	18.9844	2.62e-07	0.0256	tgccacgtgtcccca
AT5G25390	SHN3	ERF	PeNAC073	806	826	+	16.913	2.63e-07	0.00555	acccgcaccatcaccgtcacc
AT5G08070	TCP17	TCP	PeNAC023	213	223	-	19.3699	2.64e-07	0.0129	GTGGGCCCCGC
AT2G01930	BPC1	BBR-BPC	PeNAC044	960	983	-	14.125	2.64e-07	0.00036	GAGAGAGAGAGAGAGGAGAATGAG
AT5G42520	BPC6	BBR-BPC	PeNAC048	29	49	-	14.274	2.65e-07	0.00039	CTCCTTCTCTCCCTCTCTCTG
AT5G17430	BBM	AP2	PeNAC094	352	371	-	17.9873	2.67e-07	0.00068	AAAGAGAAAAAGAAAAGAGG
AT5G17430	BBM	AP2	PeNAC061	443	462	-	17.9873	2.67e-07	0.00068	AGAAGAGAAGAGAAGAGAAG
AT5G17430	BBM	AP2	PeNAC066	803	822	-	17.9873	2.67e-07	0.00068	AGAAAAGAAAAGGCAAGAGA
AT5G62940	DOF5.6	Dof	PeNAC021	27	47	-	16.4062	2.67e-07	0.00602	AGAAAACAGAAAAAGAAAAAA
AT5G10030	TGA4	bZIP	PeNAC002	228	238	-	18.9375	2.69e-07	0.0556	TGACGTCATCA
AT4G38910	BPC5	BBR-BPC	PeNAC062	390	419	-	-18.481	2.69e-07	0.0004	AAAGAAAGAAAGAGAGATGTGGGGGGAGGG
AT5G08130	BIM1	bHLH	PeNAC083	430	443	-	18.4844	2.69e-07	0.0528	CACGTGCCATACAC
AT4G38910	BPC5	BBR-BPC	PeNAC084	247	276	-	-18.5063	2.7e-07	0.0004	AAAAAGAGAGAGAGTGAGAGAGATTTTATA
AT1G69570	CDF5	Dof	PeNAC045	10	36	+	17.8125	2.7e-07	0.00269	ttcacactttttccccttttttgtttt
AT2G45660	SOC1	MIKC_MADS	PeNAC065	206	226	+	17.5217	2.71e-07	0.00045	tctttttttttttgtttttct
AT2G45660	SOC1	MIKC_MADS	PeNAC094	359	379	+	17.5217	2.71e-07	0.00045	tctttttctcttttttttctt
AT2G45660	SOC1	MIKC_MADS	PeNAC021	839	859	+	17.5217	2.71e-07	0.00045	tctctctctctctctcttcat
AT4G28140	ERF054	ERF	PeNAC051	769	788	-	18.6875	2.72e-07	0.0143	GCCGGTGACTACGCCGGTGG
AT2G22750	AT2G22750	bHLH	PeNAC014	727	743	+	18.863	2.72e-07	0.0279	aacgcttgccacgtgtc
AT3G50410	DOF3.4	Dof	PeNAC094	353	373	+	16.125	2.73e-07	0.00489	ctcttttctttttctcttttt
AT4G38910	BPC5	BBR-BPC	PeNAC082	897	926	+	-18.5823	2.74e-07	0.0004	aaagagggaaggagagaggaaggctgagaa
AT5G25390	SHN3	ERF	PeNAC014	469	489	+	16.8261	2.75e-07	0.00555	gtgtccacctcctccaccgtt
AT4G36730	GBF1	bZIP	PeNAC056	311	320	+	15.6632	2.75e-07	0.027	cgacgtggca
AT2G01930	BPC1	BBR-BPC	PeNAC094	409	432	-	14.0312	2.75e-07	0.00038	GAGGGAGAGAGAGTGGAGGAACAA
AT2G38090	AT2G38090	MYB	PeNAC056	901	921	+	17.9367	2.76e-07	0.0564	gagggattggataagcatatt
AT2G45660	SOC1	MIKC_MADS	PeNAC091	534	554	+	17.5072	2.76e-07	0.00046	cttttttcttttttttttcct
AT5G17430	BBM	AP2	PeNAC007	872	891	-	17.9494	2.79e-07	0.0007	TGGAGAGAGAGAGAGAGAGA
AT5G66300	NAC105	NAC	PeNAC057	181	196	+	18.375	2.79e-07	0.0287	cgtgacgtccaagcaa
AT5G66300	NAC105	NAC	PeNAC058	484	499	+	18.375	2.79e-07	0.0287	cgtgacgtccaagcaa
AT4G36900	RAP2-10	ERF	PeNAC026	748	757	-	18.7778	2.79e-07	0.0338	AGCGCCGCCG
AT5G42520	BPC6	BBR-BPC	PeNAC089	354	374	-	14.1507	2.79e-07	0.00041	CTACCTGTATCTCTCTCTCTT
AT1G43700	VIP1	bZIP	PeNAC081	658	669	-	18.5781	2.79e-07	0.0577	TTGCCAGCTGGG
AT5G66940	DOF5.8	Dof	PeNAC025	542	570	+	17.4062	2.8e-07	0.00371	tttgctccacctttctctttttgttctct
AT5G25390	SHN3	ERF	PeNAC089	587	607	+	16.7826	2.81e-07	0.00555	accaccaccatcaccatctcg
AT1G03800	ERF10	ERF	PeNAC089	578	598	+	18.5781	2.82e-07	0.0136	accaccaccaccaccaccatc
AT4G38000	DOF4.7	Dof	PeNAC022	681	708	+	17.4375	2.82e-07	0.00232	tacactctttttttttcttttctttttg
AT3G21175	GATA24	GATA	PeNAC021	425	439	-	17.4688	2.82e-07	0.0145	TCATCATCATCATAC
AT2G01930	BPC1	BBR-BPC	PeNAC058	535	558	-	13.9688	2.83e-07	0.00038	TATTGTGGGAGAGAGAGAGAGAGA
AT1G75390	BZIP44	bZIP	PeNAC078	538	552	-	19.0156	2.83e-07	0.0291	TGGGATGACGTGGAA
AT1G45249	ABF2	bZIP	PeNAC014	804	821	+	19.1875	2.83e-07	0.0193	tcctccgccacgtgtccc
AT1G36060	ERF055	ERF	PeNAC101	671	684	-	18.5312	2.84e-07	0.0425	GTGGACGGTGGGGA
AT2G01930	BPC1	BBR-BPC	PeNAC104	660	683	-	13.9531	2.85e-07	0.00038	GGGAAAGGGAGAAAGAGGGGTTGA
AT5G17430	BBM	AP2	PeNAC083	498	517	+	17.9241	2.87e-07	0.00071	aaaagaaaaagaaaaagaaa
AT1G72740	AT1G72740	MYB_related	PeNAC010	188	202	+	18.9118	2.89e-07	0.0298	gataaaccctaaacc
AT5G02460	DOF5.1	Dof	PeNAC024	182	202	-	17.2188	2.9e-07	0.00323	AGAAAAGAAAAAAAGAGAGAG
AT5G42520	BPC6	BBR-BPC	PeNAC087	620	640	-	14.0548	2.9e-07	0.00043	CATAGCCCCTCTCTCTCTCTC
AT3G47500	CDF3	Dof	PeNAC045	10	28	-	16.8125	2.9e-07	0.0589	AAAGGGGAAAAAGTGTGAA
AT2G01570	RGA	GRAS	PeNAC025	547	566	-	17.3714	2.92e-07	0.00171	AACAAAAAGAGAAAGGTGGA
AT5G18560	ERF086	ERF	PeNAC023	519	533	+	18.875	2.93e-07	0.0296	caccagccgccgcct
AT5G62380	NAC101	NAC	PeNAC052	900	920	+	18.5781	2.94e-07	0.0269	ttgcttgcaattgaaggtacc
AT5G62380	NAC101	NAC	PeNAC078	902	922	+	18.5781	2.94e-07	0.0269	ttgcttgcaattgaaggtacc
AT3G20310	ERF7	ERF	PeNAC014	470	490	+	18.3906	2.94e-07	0.00875	tgtccacctcctccaccgttt
AT3G50410	DOF3.4	Dof	PeNAC041	717	737	+	16.0781	2.95e-07	0.00489	gttttttttttcctccttttt
AT1G51700	DOF1.7	Dof	PeNAC020	275	295	+	16.0781	2.96e-07	0.007	gaaaaaaaaaagaaaaaaaaa
AT1G72050	TFIIIA	C2H2	PeNAC048	35	53	-	18.1513	2.97e-07	0.00475	CTCTCTCCTTCTCTCCCTC
AT5G61600	ERF104	ERF	PeNAC089	580	598	+	18.3906	2.98e-07	0.0145	caccaccaccaccaccatc
AT2G01930	BPC1	BBR-BPC	PeNAC102	814	837	-	13.8438	2.98e-07	0.0004	GAGAGAGAGAGAGGAGAGGCTGGA
AT2G01930	BPC1	BBR-BPC	PeNAC029	940	963	-	13.8438	2.98e-07	0.0004	GAGAGAGAGAGAAAGCAAGGGAAG
AT5G17430	BBM	AP2	PeNAC034	697	716	-	17.8861	2.99e-07	0.00072	AAAGAAAAAAAAAAAAAAAA
AT1G22810	ERF019	ERF	PeNAC089	584	598	-	18.6562	2.99e-07	0.0151	GATGGTGGTGGTGGT
AT4G38910	BPC5	BBR-BPC	PeNAC007	847	876	-	-18.9873	3e-07	0.00043	AGAGAGAAGGACAGAGAGAGGGATTTGGGG
AT4G38910	BPC5	BBR-BPC	PeNAC008	853	882	-	-18.9873	3e-07	0.00043	AGAGAGAAGGACAGAGAGAGGGATTTGGGG
AT1G20640	NLP4	Nin-like	PeNAC023	652	666	-	17.1912	3.02e-07	0.00662	TCAGCAGCAGGGTCG
AT3G55370	OBP3	Dof	PeNAC059	801	821	-	17.1094	3.02e-07	0.00316	TTGCCTTTTCTTTTTTTTTTT
AT2G01930	BPC1	BBR-BPC	PeNAC061	435	458	-	13.8125	3.02e-07	0.0004	GAGAAGAGAAGAGAAGGTGGGAGA
AT5G17430	BBM	AP2	PeNAC024	201	220	-	17.8734	3.04e-07	0.00072	AAAAAAAAAAAAAAAAAAAG
AT5G17430	BBM	AP2	PeNAC084	254	273	-	17.8734	3.04e-07	0.00072	AAGAGAGAGAGTGAGAGAGA
AT5G17430	BBM	AP2	PeNAC061	639	658	-	17.8734	3.04e-07	0.00072	AAAAAAAAAAAGAAAAAAGA
AT2G45660	SOC1	MIKC_MADS	PeNAC040	252	272	-	17.4348	3.05e-07	0.0005	TTCTTTTTTTTTCCTTTTTTG
AT5G63090	LOB	LBD	PeNAC089	575	595	+	17.875	3.05e-07	0.0218	accaccaccaccaccaccacc
AT2G01570	RGA	GRAS	PeNAC046	62	81	-	17.3286	3.06e-07	0.00171	AAGAGAGAGAGAGAGAGAGA
AT2G01570	RGA	GRAS	PeNAC074	539	558	-	17.3286	3.06e-07	0.00171	AAGAGAGAGAGAGAGAGAGA
AT2G01570	RGA	GRAS	PeNAC021	837	856	-	17.3286	3.06e-07	0.00171	AAGAGAGAGAGAGAGAGAGA
AT3G20310	ERF7	ERF	PeNAC023	513	533	+	18.3281	3.07e-07	0.00875	ttccgtcaccagccgccgcct
AT5G66940	DOF5.8	Dof	PeNAC060	609	637	+	17.3281	3.07e-07	0.00381	ttatcttttttattttctttttgatccct
AT3G23210	BHLH34	bHLH	PeNAC094	480	502	-	18.3594	3.07e-07	0.0144	GTGCTGGACACGTGGAGGTTGTG
AT5G17430	BBM	AP2	PeNAC034	700	719	-	17.8608	3.08e-07	0.00072	GAGAAAGAAAAAAAAAAAAA
AT2G31220	BHLH10	bHLH	PeNAC016	327	340	-	18.3438	3.1e-07	0.0304	TACTGTGTCGGCGG
AT1G77200	ERF037	ERF	PeNAC016	327	340	+	18.4844	3.11e-07	0.031	ccgccgacacagta
AT4G17785	MYB39	MYB	PeNAC080	82	95	-	17.2031	3.11e-07	0.0642	AGAGTTAGGTGAAA
AT1G51700	DOF1.7	Dof	PeNAC091	532	552	-	16.0469	3.12e-07	0.007	GAAAAAAAAAAGAAAAAAGAG
AT1G50640	ERF3	ERF	PeNAC103	485	499	+	18.5938	3.12e-07	0.0307	gtacggcggaggagg
AT5G17430	BBM	AP2	PeNAC024	188	207	-	17.8481	3.12e-07	0.00072	AAAAAAGAAAAGAAAAAAAG
AT5G11260	HY5	bZIP	PeNAC101	865	879	+	18.9062	3.14e-07	0.0324	tttgatgacgtgtcg
AT2G01570	RGA	GRAS	PeNAC007	862	881	-	17.3	3.16e-07	0.00171	GAGAGAGAGAGAAGGACAGA
AT2G01570	RGA	GRAS	PeNAC008	868	887	-	17.3	3.16e-07	0.00171	GAGAGAGAGAGAAGGACAGA
AT5G23280	TCP7	TCP	PeNAC077	624	634	-	19.1562	3.16e-07	0.0288	GTGGGGCCCGT
AT1G49480	REM19	B3	PeNAC092	199	213	-	17.6324	3.16e-07	0.00211	CCCAAAAAAAAAAAA
AT4G28140	ERF054	ERF	PeNAC023	513	532	-	18.5	3.16e-07	0.0143	GGCGGCGGCTGGTGACGGAA
AT2G45660	SOC1	MIKC_MADS	PeNAC002	98	118	+	17.4058	3.17e-07	0.00051	tctcctctttttttttttttg
AT2G45660	SOC1	MIKC_MADS	PeNAC063	899	919	+	17.4058	3.17e-07	0.00051	cttctccttctccttctcctc
AT1G59640	BPE	bHLH	PeNAC073	722	742	-	18.0938	3.2e-07	0.0299	CAGGTGACACGTGGTGAACGT
AT3G30530	ATBZIP42	bZIP	PeNAC101	867	878	+	18.1772	3.21e-07	0.0331	tgatgacgtgtc
AT1G19350	BZR2	BES1	PeNAC091	733	743	+	17.9241	3.21e-07	0.0628	cacacgtggcc
AT5G25190	ERF003	ERF	PeNAC089	584	602	-	18.3594	3.22e-07	0.0138	TGGTGATGGTGGTGGTGGT
AT4G34590	BZIP11	bZIP	PeNAC101	865	879	-	18.7812	3.22e-07	0.0279	CGACACGTCATCAAA
AT1G71450	ERF021	ERF	PeNAC041	146	165	+	18.125	3.22e-07	0.00637	tgcctctgacttcgccgtca
AT4G38910	BPC5	BBR-BPC	PeNAC084	245	274	-	-19.2911	3.22e-07	0.00046	AAAGAGAGAGAGTGAGAGAGATTTTATAAT
AT3G22170	FHY3	FAR1	PeNAC002	646	657	+	18.1912	3.27e-07	0.0325	gacacgcgctca
AT2G45660	SOC1	MIKC_MADS	PeNAC079	54	74	-	17.3768	3.29e-07	0.00053	CTCCTCTCTTTGTTTTTTTCT
AT2G45660	SOC1	MIKC_MADS	PeNAC072	855	875	+	17.3768	3.29e-07	0.00053	cctttttttttctctctctat
AT5G53950	NAC098	NAC	PeNAC057	181	199	+	18.4062	3.31e-07	0.034	cgtgacgtccaagcaacct
AT5G53950	NAC098	NAC	PeNAC058	484	502	+	18.4062	3.31e-07	0.034	cgtgacgtccaagcaacct
AT2G30340	LBD13	LBD	PeNAC103	488	504	+	18.4531	3.31e-07	0.0631	cggcggaggaggcgtag
AT3G22780	TSO1	CPP	PeNAC099	81	95	+	16.9726	3.33e-07	0.0229	atttcaaaatttaaa
AT4G38000	DOF4.7	Dof	PeNAC083	494	521	-	17.2812	3.34e-07	0.00264	TTTTTTTCTTTTTCTTTTTCTTTTTTTT
AT5G65130	AT5G65130	ERF	PeNAC089	585	599	+	18.375	3.34e-07	0.0116	ccaccaccaccatca
AT4G38910	BPC5	BBR-BPC	PeNAC015	382	411	+	-19.4557	3.34e-07	0.00048	atatatatagagagagagagtgggtgaaaa
AT5G17430	BBM	AP2	PeNAC094	284	303	+	17.7848	3.35e-07	0.00076	aaaaaaaaggaaaaaaaagg
AT2G45660	SOC1	MIKC_MADS	PeNAC074	849	869	+	17.3623	3.36e-07	0.00053	ttccttctttttttttttttc
AT2G01570	RGA	GRAS	PeNAC057	226	245	-	17.2429	3.37e-07	0.00173	GAGAGAGAGAGAGAGATAGA
AT2G01570	RGA	GRAS	PeNAC058	529	548	-	17.2429	3.37e-07	0.00173	GAGAGAGAGAGAGAGATAGA
AT2G33710	AT2G33710	ERF	PeNAC103	485	499	-	18.4531	3.38e-07	0.0318	CCTCCTCCGCCGTAC
AT3G45150	TCP16	TCP	PeNAC063	194	204	+	19.2405	3.39e-07	0.0165	atggggtccac
AT3G55370	OBP3	Dof	PeNAC059	802	822	-	17.0156	3.39e-07	0.00337	TTTGCCTTTTCTTTTTTTTTT
AT2G15740	AT2G15740	C2H2	PeNAC032	287	297	-	15.8281	3.4e-07	0.0699	GTCGACGACGA
AT3G10800	BZIP28	bZIP	PeNAC014	809	823	-	18.4062	3.4e-07	0.0234	TGGGGACACGTGGCG
AT3G50260	ERF011	ERF	PeNAC089	576	590	+	18.5156	3.42e-07	0.0144	ccaccaccaccacca
AT3G50260	ERF011	ERF	PeNAC089	579	593	+	18.5156	3.42e-07	0.0144	ccaccaccaccacca
AT3G50260	ERF011	ERF	PeNAC089	582	596	+	18.5156	3.42e-07	0.0144	ccaccaccaccacca
AT2G45660	SOC1	MIKC_MADS	PeNAC021	30	50	+	17.3478	3.42e-07	0.00053	tttctttttctgttttctttt
AT2G45660	SOC1	MIKC_MADS	PeNAC078	84	104	+	17.3478	3.42e-07	0.00053	ttctttctttttttttttttt
AT2G45660	SOC1	MIKC_MADS	PeNAC022	686	706	+	17.3478	3.42e-07	0.00053	tctttttttttcttttctttt
AT1G03840	MGP	C2H2	PeNAC046	925	944	-	18.5781	3.44e-07	0.0685	CTAAAAACGACAAAACAAGG
AT5G63090	LOB	LBD	PeNAC026	461	481	-	17.6719	3.45e-07	0.0218	GCCGCCGGCGTCTCTGTAGGC
AT4G28140	ERF054	ERF	PeNAC089	576	595	-	18.3906	3.45e-07	0.0143	GGTGGTGGTGGTGGTGGTGG
AT1G51700	DOF1.7	Dof	PeNAC030	967	987	+	15.9844	3.45e-07	0.007	aggaaggaaaagaagaaaaaa
AT4G17490	ERF6	ERF	PeNAC023	519	539	+	17.75	3.49e-07	0.0317	caccagccgccgccttggagt
AT2G45660	SOC1	MIKC_MADS	PeNAC024	189	209	+	17.3333	3.49e-07	0.00053	tttttttcttttctttttttt
AT1G49480	REM19	B3	PeNAC065	207	221	-	17.4265	3.5e-07	0.00226	AACAAAAAAAAAAAG
AT5G13910	LEP	ERF	PeNAC103	477	497	-	18.1094	3.51e-07	0.0341	TCCTCCGCCGTACAAACCGGG
AT2G35700	ERF038	ERF	PeNAC016	321	335	-	18.2969	3.52e-07	0.0227	TGTCGGCGGTGCACG
AT2G35700	ERF038	ERF	PeNAC015	691	705	-	18.2969	3.52e-07	0.0227	TGTCGGCGGTGCACG
AT3G56850	DPBF3	bZIP	PeNAC001	526	540	+	18.9688	3.52e-07	0.0237	catgatgacgtggca
AT1G18960	AT1G18960	MYB_related	PeNAC048	176	197	-	17.1233	3.52e-07	0.0176	CAGCTCTAACAACAACAACAAA
AT3G48430	REF6	C2H2	PeNAC001	425	436	+	18.726	3.54e-07	0.0616	agaaacagagga
AT2G45660	SOC1	MIKC_MADS	PeNAC062	257	277	-	17.3188	3.56e-07	0.00054	CTCCTTCTTTTCTCTTCTTTT
AT5G25190	ERF003	ERF	PeNAC089	581	599	-	18.2031	3.56e-07	0.0138	TGATGGTGGTGGTGGTGGT
AT4G38910	BPC5	BBR-BPC	PeNAC025	714	743	-	-19.7468	3.56e-07	0.0005	AGAGACAGAATTGGACAGAGATAGAGAGAG
AT2G03500	EFM	G2-like	PeNAC070	465	475	+	15.9688	3.57e-07	0.074	ggaatattcgg
AT2G01930	BPC1	BBR-BPC	PeNAC070	415	438	+	13.4219	3.57e-07	0.00047	gggagagtgaaacaaagagtgtga
AT5G17430	BBM	AP2	PeNAC097	89	108	-	17.7215	3.59e-07	0.00079	CAAAAAAAGAAAAAGAAAAA
AT5G17430	BBM	AP2	PeNAC013	111	130	-	17.7215	3.59e-07	0.00079	CAAAAAAAGAAAAAGAAAAA
AT5G17430	BBM	AP2	PeNAC012	112	131	-	17.7215	3.59e-07	0.00079	CAAAAAAAGAAAAAGAAAAA
AT3G50260	ERF011	ERF	PeNAC073	810	824	+	18.4531	3.6e-07	0.0144	gcaccatcaccgtca
AT3G03200	NAC045	NAC	PeNAC057	181	196	+	18.0312	3.61e-07	0.0372	cgtgacgtccaagcaa
AT3G03200	NAC045	NAC	PeNAC058	484	499	+	18.0312	3.61e-07	0.0372	cgtgacgtccaagcaa
AT4G38910	BPC5	BBR-BPC	PeNAC049	869	898	-	-19.8228	3.61e-07	0.00051	GGATTGATTGAGAGAAAATGAGAAGGACTC
AT5G65130	AT5G65130	ERF	PeNAC056	547	561	+	18.2344	3.62e-07	0.0116	ctacagccaccgcct
AT2G01930	BPC1	BBR-BPC	PeNAC029	942	965	-	13.3906	3.62e-07	0.00047	ATGAGAGAGAGAGAAAGCAAGGGA
AT2G45660	SOC1	MIKC_MADS	PeNAC091	532	552	+	17.3043	3.62e-07	0.00054	ctcttttttcttttttttttc
AT2G45660	SOC1	MIKC_MADS	PeNAC061	637	657	+	17.3043	3.62e-07	0.00054	cttcttttttctttttttttt
AT5G47230	ERF5	ERF	PeNAC103	488	502	-	18.0625	3.63e-07	0.0142	ACGCCTCCTCCGCCG
AT5G17430	BBM	AP2	PeNAC094	281	300	+	17.7089	3.64e-07	0.00079	aaaaaaaaaaaggaaaaaaa
AT5G42520	BPC6	BBR-BPC	PeNAC046	51	71	+	13.4932	3.64e-07	0.00053	tttctgcactctctctctctc
AT1G72050	TFIIIA	C2H2	PeNAC061	433	451	+	17.8403	3.64e-07	0.00503	cttctcccaccttctcttc
AT2G01570	RGA	GRAS	PeNAC057	230	249	-	17.1714	3.65e-07	0.00176	GGGAGAGAGAGAGAGAGAGA
AT2G01570	RGA	GRAS	PeNAC058	533	552	-	17.1714	3.65e-07	0.00176	GGGAGAGAGAGAGAGAGAGA
AT5G17430	BBM	AP2	PeNAC020	276	295	+	17.6962	3.69e-07	0.00079	aaaaaaaaaagaaaaaaaaa
AT5G17430	BBM	AP2	PeNAC061	445	464	-	17.6962	3.69e-07	0.00079	GAAGAAGAGAAGAGAAGAGA
AT2G45660	SOC1	MIKC_MADS	PeNAC007	856	876	+	17.2899	3.69e-07	0.00054	cctctctctgtccttctctct
AT2G45660	SOC1	MIKC_MADS	PeNAC008	862	882	+	17.2899	3.69e-07	0.00054	cctctctctgtccttctctct
AT4G38000	DOF4.7	Dof	PeNAC061	632	659	+	17.1875	3.69e-07	0.00265	gttttcttcttttttctttttttttttc
AT4G38000	DOF4.7	Dof	PeNAC020	277	304	-	17.1875	3.69e-07	0.00265	CATTTTTATTTTTTTTTTCTTTTTTTTT
AT3G13810	AtIDD11	C2H2	PeNAC046	923	943	+	17.2031	3.69e-07	0.0369	ctccttgttttgtcgttttta
AT1G69690	TCP15	TCP	PeNAC075	716	728	-	18.5781	3.7e-07	0.03	TGGTGGAACCCAC
AT4G18450	ERF091	ERF	PeNAC023	515	531	-	18.0156	3.7e-07	0.0209	GCGGCGGCTGGTGACGG
AT5G25390	SHN3	ERF	PeNAC073	803	823	+	16.2464	3.7e-07	0.00665	gccacccgcaccatcaccgtc
AT5G61600	ERF104	ERF	PeNAC023	517	535	+	18.0312	3.71e-07	0.0145	gtcaccagccgccgccttg
AT2G01570	RGA	GRAS	PeNAC074	554	573	-	17.1571	3.71e-07	0.00176	GAGAGAGAGAGAGAGAAGAG
AT3G61120	AGL13	MIKC_MADS	PeNAC051	210	227	-	18.5147	3.72e-07	0.0764	TTGCCAAAATGGGAAAAA
AT1G64620	DOF1.8	Dof	PeNAC102	237	255	+	15.6094	3.72e-07	0.076	taaaaagaaaaaggaaaat
AT5G67000	ERF122	ERF	PeNAC023	522	536	-	17.8904	3.73e-07	0.0603	CCAAGGCGGCGGCTG
AT5G66940	DOF5.8	Dof	PeNAC078	74	102	+	17.1562	3.74e-07	0.00427	catcgtttctttctttctttttttttttt
AT5G17430	BBM	AP2	PeNAC021	839	858	-	17.6835	3.74e-07	0.00079	TGAAGAGAGAGAGAGAGAGA
AT1G32510	ANAC011	NAC	PeNAC011	613	633	-	18.5294	3.75e-07	0.0345	ATAACTTGGAACCCAAGTAAC
AT2G45660	SOC1	MIKC_MADS	PeNAC074	543	563	+	17.2754	3.76e-07	0.00055	tctctctctctctcttctctc
AT2G01930	BPC1	BBR-BPC	PeNAC074	856	879	-	13.2812	3.79e-07	0.00049	AATAGAGAGAGAAAAAAAAAAAAA
AT5G17430	BBM	AP2	PeNAC087	610	629	+	17.6709	3.79e-07	0.00079	agaacagtgagagagagaga
AT1G49720	ABF1	bZIP	PeNAC014	733	751	+	17.4419	3.8e-07	0.0178	tgccacgtgtccccagcat
AT5G66730	IDD1	C2H2	PeNAC046	928	944	-	18.3906	3.81e-07	0.0656	CTAAAAACGACAAAACA
AT5G25810	TINY	ERF	PeNAC064	440	454	+	18.0781	3.82e-07	0.0254	ctccaccgacgaacc
AT1G44830	ERF014	ERF	PeNAC089	585	599	+	18.4062	3.82e-07	0.0128	ccaccaccaccatca
AT4G38000	DOF4.7	Dof	PeNAC078	77	104	+	17.1562	3.82e-07	0.00265	cgtttctttctttctttttttttttttt
AT4G36900	RAP2-10	ERF	PeNAC023	524	533	+	18.5983	3.83e-07	0.0338	gccgccgcct
AT2G45660	SOC1	MIKC_MADS	PeNAC024	194	214	+	17.2609	3.84e-07	0.00056	ttcttttcttttttttttttt
AT3G24050	GATA1	GATA	PeNAC089	574	588	-	18.0882	3.85e-07	0.0056	GTGGTGGTGGTGGTT
AT4G28140	ERF054	ERF	PeNAC015	685	704	-	18.25	3.86e-07	0.0143	GTCGGCGGTGCACGTGTAGC
AT1G29160	DOF1.5	Dof	PeNAC045	10	30	-	16.3438	3.86e-07	0.028	AAAAAGGGGAAAAAGTGTGAA
AT1G22810	ERF019	ERF	PeNAC089	587	601	-	18.3125	3.86e-07	0.0156	GGTGATGGTGGTGGT
AT1G72050	TFIIIA	C2H2	PeNAC067	638	656	+	17.7479	3.87e-07	0.00503	cgtcttcttccttcacctc
AT5G66940	DOF5.8	Dof	PeNAC031	744	772	-	17.125	3.87e-07	0.00427	GCTCTTTCCATTTTTACTTTTTATTACAA
AT4G38000	DOF4.7	Dof	PeNAC002	101	128	+	17.1406	3.88e-07	0.00265	cctctttttttttttttgaatcttttta
AT3G50410	DOF3.4	Dof	PeNAC072	841	861	+	15.9062	3.89e-07	0.00595	gttcccttttctttccttttt
AT3G47620	TCP14	TCP	PeNAC063	332	351	-	12.9535	3.89e-07	0.0469	GAGTGGAGGGTGGGGACCAC
AT2G45660	SOC1	MIKC_MADS	PeNAC085	585	605	+	17.2464	3.91e-07	0.00056	tttctttttttctgtttttgt
AT5G42520	BPC6	BBR-BPC	PeNAC082	896	916	-	13.3151	3.91e-07	0.00056	TCCTCTCTCCTTCCCTCTTTC
AT3G04060	anac046	NAC	PeNAC057	178	198	+	18.5156	3.92e-07	0.0402	agacgtgacgtccaagcaacc
AT3G04060	anac046	NAC	PeNAC058	481	501	+	18.5156	3.92e-07	0.0402	agacgtgacgtccaagcaacc
AT1G67260	TCP1	TCP	PeNAC023	195	224	-	17.6962	3.93e-07	0.018	GGTGGGCCCCGCCTATGTGTAGTACACACA
AT2G01570	RGA	GRAS	PeNAC023	748	767	-	17.1	3.95e-07	0.00179	GAGAGAGAGAGAGAGAGAGC
AT2G01570	RGA	GRAS	PeNAC018	979	998	-	17.1	3.95e-07	0.00179	GAGAGAGAGAGAGAGAGAGC
AT5G42520	BPC6	BBR-BPC	PeNAC015	870	890	+	13.2877	3.95e-07	0.00057	aaatcacactctctctatctc
AT5G17430	BBM	AP2	PeNAC055	217	236	-	17.6329	3.96e-07	0.00082	GGAAAAAAAAAAGAGAAAAG
AT2G45660	SOC1	MIKC_MADS	PeNAC022	687	707	+	17.2319	3.98e-07	0.00057	ctttttttttcttttcttttt
AT5G44210	ERF9	ERF	PeNAC103	479	499	+	17.5781	3.99e-07	0.0194	cggtttgtacggcggaggagg
AT1G71450	ERF021	ERF	PeNAC019	649	668	-	17.8125	3.99e-07	0.00657	CGCCTACAGCCCCACCACCA
AT1G71450	ERF021	ERF	PeNAC017	649	668	-	17.8125	3.99e-07	0.00657	CGCCTACAGCCCCACCACCA
AT3G28920	ZHD9	ZF-HD	PeNAC084	435	449	-	14.5294	3.99e-07	0.0824	TTAAATCCTTAATCA
AT4G38910	BPC5	BBR-BPC	PeNAC022	285	314	-	-20.2658	4e-07	0.00056	ATAGAGAGAGAGAGAGAGAGCATTAACTAG
AT2G04038	AtbZIP48	bZIP	PeNAC101	865	878	-	18.3438	4.02e-07	0.0412	GACACGTCATCAAA
AT4G16750	ERF039	ERF	PeNAC073	811	825	+	18.0312	4.02e-07	0.0259	caccatcaccgtcac
AT3G55370	OBP3	Dof	PeNAC066	64	84	+	16.875	4.03e-07	0.00382	tttcctttttatcctcttctt
AT1G08320	TGA9	bZIP	PeNAC002	229	239	+	19.5625	4.04e-07	0.0417	gatgacgtcat
AT1G08320	TGA9	bZIP	PeNAC002	230	240	-	19.5625	4.04e-07	0.0417	GATGACGTCAT
AT2G45660	SOC1	MIKC_MADS	PeNAC065	129	149	+	17.2174	4.06e-07	0.00058	cttccttctttgtctttccct
AT1G69570	CDF5	Dof	PeNAC020	266	292	-	17.4062	4.08e-07	0.00387	TTTTTTCTTTTTTTTTTCATGTTATTT
AT5G12870	MYB46	MYB	PeNAC018	724	733	+	15.6058	4.08e-07	0.0844	aggtaggtgg
AT1G74930	ERF018	ERF	PeNAC055	891	900	+	18.6731	4.08e-07	0.0794	caccgaccaa
AT1G49480	REM19	B3	PeNAC024	207	221	-	17.3088	4.09e-07	0.00241	CAAAAAAAAAAAAAA
AT1G49480	REM19	B3	PeNAC104	349	363	-	17.3088	4.09e-07	0.00241	CAAAAAAAAAAAAAA
AT1G49480	REM19	B3	PeNAC086	809	823	+	17.3088	4.09e-07	0.00241	caaaaaaaaaaaaaa
AT3G24050	GATA1	GATA	PeNAC089	592	606	-	18.0294	4.09e-07	0.0056	GAGATGGTGATGGTG
AT2G01930	BPC1	BBR-BPC	PeNAC062	391	414	-	13.0938	4.1e-07	0.00053	AAGAAAGAGAGATGTGGGGGGAGG
AT4G36930	SPT	bHLH	PeNAC010	763	771	+	16.4105	4.12e-07	0.0572	cccacgtgc
AT4G34590	BZIP11	bZIP	PeNAC078	538	552	+	18.3906	4.12e-07	0.0279	ttccacgtcatccca
AT1G29160	DOF1.5	Dof	PeNAC094	278	298	+	16.2969	4.13e-07	0.028	agcaaaaaaaaaaaggaaaaa
AT2G45660	SOC1	MIKC_MADS	PeNAC083	494	514	-	17.2029	4.13e-07	0.00058	CTTTTTCTTTTTCTTTTTTTT
AT4G38910	BPC5	BBR-BPC	PeNAC094	898	927	+	-20.4177	4.14e-07	0.00057	aaaaaaagagaaaaaattttagagagagag
AT5G08330	TCP21	TCP	PeNAC063	331	344	+	18.4531	4.14e-07	0.0301	tgtggtccccaccc
AT3G62420	BZIP53	bZIP	PeNAC078	538	552	-	18.3594	4.14e-07	0.0297	TGGGATGACGTGGAA
AT4G38910	BPC5	BBR-BPC	PeNAC046	67	96	-	-20.4304	4.14e-07	0.00057	AAAGAAATATCTGAAAAGAGAGAGAGAGAG
AT1G19040	AT1G19040	NAC	PeNAC007	583	598	+	18.5781	4.15e-07	0.0122	tagcttggcaagcaag
AT1G19040	AT1G19040	NAC	PeNAC008	589	604	+	18.5781	4.15e-07	0.0122	tagcttggcaagcaag
AT1G03800	ERF10	ERF	PeNAC023	512	532	+	17.9531	4.17e-07	0.0161	gttccgtcaccagccgccgcc
AT5G42520	BPC6	BBR-BPC	PeNAC007	855	875	+	13.1507	4.17e-07	0.00059	ccctctctctgtccttctctc
AT5G42520	BPC6	BBR-BPC	PeNAC008	861	881	+	13.1507	4.17e-07	0.00059	ccctctctctgtccttctctc
AT3G10490	ANAC052	NAC	PeNAC043	7	26	+	18.274	4.2e-07	0.0286	ctttcttcaaccccaagtca
AT2G01570	RGA	GRAS	PeNAC074	550	569	-	17.0429	4.2e-07	0.00186	GAGAGAGAGAGAAGAGAGAG
AT1G72050	TFIIIA	C2H2	PeNAC089	576	594	+	17.6218	4.2e-07	0.00503	ccaccaccaccaccaccac
AT1G51700	DOF1.7	Dof	PeNAC097	85	105	-	15.8594	4.21e-07	0.007	AAAAAGAAAAAGAAAAACAGA
AT1G51700	DOF1.7	Dof	PeNAC013	107	127	-	15.8594	4.21e-07	0.007	AAAAAGAAAAAGAAAAACAGA
AT1G51700	DOF1.7	Dof	PeNAC012	108	128	-	15.8594	4.21e-07	0.007	AAAAAGAAAAAGAAAAACAGA
AT2G01930	BPC1	BBR-BPC	PeNAC083	500	523	+	13.0312	4.21e-07	0.00054	aagaaaaagaaaaagaaaaaaaga
AT4G38000	DOF4.7	Dof	PeNAC078	79	106	+	17.0625	4.22e-07	0.00273	tttctttctttcttttttttttttttta
AT5G17430	BBM	AP2	PeNAC022	296	315	-	17.5696	4.23e-07	0.00086	TATAGAGAGAGAGAGAGAGA
AT5G38800	BZIP43	bZIP	PeNAC078	539	550	+	17.8023	4.23e-07	0.0341	tccacgtcatcc
AT3G26790	FUS3	B3	PeNAC015	221	235	-	17.25	4.24e-07	0.0291	GCATGCATGCATCCA
AT3G26790	FUS3	B3	PeNAC045	464	478	-	17.25	4.24e-07	0.0291	ACAAGCATGCATGCC
AT4G01540	NAC68	NAC	PeNAC014	850	864	+	17.6406	4.25e-07	0.0546	ccttgtgtcctaagt
AT3G60490	ERF035	ERF	PeNAC015	697	710	-	18.6406	4.25e-07	0.0653	AACTGTGTCGGCGG
AT5G09410	EICBP.B	CAMTA	PeNAC054	839	850	+	17.2812	4.26e-07	0.0276	gaaccgcgtgga
AT2G01930	BPC1	BBR-BPC	PeNAC084	262	285	-	13	4.27e-07	0.00054	AATATATAGAAAAAGAGAGAGAGT
AT1G69570	CDF5	Dof	PeNAC091	535	561	+	17.3594	4.27e-07	0.00387	ttttttcttttttttttcctgatttgt
AT2G45660	SOC1	MIKC_MADS	PeNAC061	635	655	+	17.1739	4.29e-07	0.0006	ttcttcttttttctttttttt
AT4G38000	DOF4.7	Dof	PeNAC078	78	105	+	17.0469	4.29e-07	0.00273	gtttctttctttcttttttttttttttt
AT4G18450	ERF091	ERF	PeNAC001	797	813	+	17.75	4.29e-07	0.0209	ccggcggctgaaccgac
AT3G10480	ANAC050	NAC	PeNAC007	586	601	+	18.6875	4.3e-07	0.0342	cttggcaagcaagtca
AT3G10480	ANAC050	NAC	PeNAC008	592	607	+	18.6875	4.3e-07	0.0342	cttggcaagcaagtca
AT5G09410	EICBP.B	CAMTA	PeNAC105	420	431	+	17.2656	4.3e-07	0.0276	taggcgcgtggg
AT1G72050	TFIIIA	C2H2	PeNAC041	353	371	+	17.5798	4.32e-07	0.00503	tatcaccctcttcctcccc
AT3G55370	OBP3	Dof	PeNAC074	851	871	+	16.8125	4.34e-07	0.00393	ccttctttttttttttttctc
AT5G20240	PI	MIKC_MADS	PeNAC098	840	853	-	17.3281	4.35e-07	0.0868	CCAAAAAGAGAAAG
AT3G23240	ERF1B	ERF	PeNAC023	516	543	+	18.1406	4.36e-07	0.0473	cgtcaccagccgccgccttggagttgat
AT2G45660	SOC1	MIKC_MADS	PeNAC095	223	243	+	17.1594	4.37e-07	0.0006	gcctgttttctctctttctct
AT2G45660	SOC1	MIKC_MADS	PeNAC094	351	371	+	17.1594	4.37e-07	0.0006	ccctcttttctttttctcttt
AT5G23280	TCP7	TCP	PeNAC023	213	223	+	18.4844	4.37e-07	0.0288	gcggggcccac
AT5G64060	anac103	NAC	PeNAC007	583	603	-	18.3594	4.37e-07	0.01	ATTGACTTGCTTGCCAAGCTA
AT5G64060	anac103	NAC	PeNAC008	589	609	-	18.3594	4.37e-07	0.01	ATTGACTTGCTTGCCAAGCTA
AT3G50410	DOF3.4	Dof	PeNAC024	181	201	+	15.8281	4.4e-07	0.00625	tctctctctttttttcttttc
AT1G75390	BZIP44	bZIP	PeNAC101	865	879	+	18.2656	4.41e-07	0.0302	tttgatgacgtgtcg
AT5G64060	anac103	NAC	PeNAC007	581	601	+	18.3438	4.42e-07	0.01	tttagcttggcaagcaagtca
AT5G64060	anac103	NAC	PeNAC008	587	607	+	18.3438	4.42e-07	0.01	tttagcttggcaagcaagtca
AT3G62420	BZIP53	bZIP	PeNAC101	865	879	+	18.25	4.42e-07	0.0297	tttgatgacgtgtcg
AT5G65130	AT5G65130	ERF	PeNAC103	485	499	-	17.9219	4.43e-07	0.0122	CCTCCTCCGCCGTAC
AT2G45660	SOC1	MIKC_MADS	PeNAC102	232	252	-	17.1449	4.45e-07	0.00061	TTCCTTTTTCTTTTTATTTCT
AT3G06740	GATA15	GATA	PeNAC089	580	598	+	17.1304	4.45e-07	0.0152	caccaccaccaccaccatc
AT5G42520	BPC6	BBR-BPC	PeNAC074	551	571	+	12.9863	4.46e-07	0.00063	tctctcttctctctctctctc
AT5G17430	BBM	AP2	PeNAC061	642	661	-	17.519	4.46e-07	0.00089	CAGAAAAAAAAAAAGAAAAA
AT5G17430	BBM	AP2	PeNAC083	502	521	+	17.519	4.46e-07	0.00089	gaaaaagaaaaagaaaaaaa
AT5G02460	DOF5.1	Dof	PeNAC097	86	106	-	16.875	4.47e-07	0.00427	AAAAAAGAAAAAGAAAAACAG
AT5G02460	DOF5.1	Dof	PeNAC013	108	128	-	16.875	4.47e-07	0.00427	AAAAAAGAAAAAGAAAAACAG
AT5G02460	DOF5.1	Dof	PeNAC012	109	129	-	16.875	4.47e-07	0.00427	AAAAAAGAAAAAGAAAAACAG
AT5G42520	BPC6	BBR-BPC	PeNAC008	873	893	+	12.9589	4.5e-07	0.00063	ccttctctctctctctccagt
AT4G38000	DOF4.7	Dof	PeNAC020	276	303	-	17	4.51e-07	0.00278	ATTTTTATTTTTTTTTTCTTTTTTTTTT
AT5G45300	BMY2	BES1	PeNAC059	955	969	+	18.7344	4.52e-07	0.0892	ccacacgtgtcttgc
AT4G36620	GATA19	GATA	PeNAC043	124	134	-	17.1096	4.52e-07	0.0636	CAGATCGGATC
AT2G01930	BPC1	BBR-BPC	PeNAC074	852	875	-	12.8594	4.53e-07	0.00057	GAGAGAGAAAAAAAAAAAAAGAAG
AT2G45660	SOC1	MIKC_MADS	PeNAC011	333	353	-	17.1304	4.53e-07	0.00061	TTCTTTTCTTTTTCTTTCCTT
AT3G45150	TCP16	TCP	PeNAC029	741	751	+	18.6203	4.53e-07	0.0177	gatgggtccac
AT1G67260	TCP1	TCP	PeNAC091	301	330	-	17.4177	4.54e-07	0.018	AGTGGGTCCAACTGGTCCCGATGTTTTAAG
AT2G01570	RGA	GRAS	PeNAC046	58	77	-	16.9714	4.54e-07	0.00197	GAGAGAGAGAGAGAGAGAGT
AT1G32150	BZIP68	bZIP	PeNAC014	809	823	+	18.375	4.57e-07	0.0297	cgccacgtgtcccca
AT1G69690	TCP15	TCP	PeNAC023	211	223	+	18.2969	4.6e-07	0.03	aggcggggcccac
AT1G49480	REM19	B3	PeNAC078	148	162	-	17.2647	4.6e-07	0.00256	AAAAAAAAAAAAACA
AT1G49480	REM19	B3	PeNAC057	577	591	-	17.2647	4.6e-07	0.00256	AAAAAAAAAAAAACA
AT5G08330	TCP21	TCP	PeNAC101	666	679	+	18.3438	4.6e-07	0.0301	tgtggtccccaccg
AT4G38910	BPC5	BBR-BPC	PeNAC087	617	646	+	-20.9367	4.6e-07	0.00063	tgagagagagagagaggggctatgaccgac
AT5G07310	ERF115	ERF	PeNAC026	466	480	-	17.7188	4.61e-07	0.0222	CCGCCGGCGTCTCTG
AT2G31230	ERF15	ERF	PeNAC023	520	534	+	18.1094	4.61e-07	0.0268	accagccgccgcctt
AT2G45660	SOC1	MIKC_MADS	PeNAC021	28	48	+	17.1159	4.62e-07	0.00062	tttttctttttctgttttctt
AT1G20640	NLP4	Nin-like	PeNAC040	808	822	-	16.8676	4.62e-07	0.00914	GAAGCAGCAGCAATG
AT1G34670	AtMYB93	MYB	PeNAC065	648	668	+	16.7031	4.65e-07	0.0474	ggggggatggtgggtgtgaag
AT5G07310	ERF115	ERF	PeNAC023	522	536	+	17.7031	4.65e-07	0.0222	cagccgccgccttgg
AT4G21030	DOF4.2	Dof	PeNAC102	239	257	+	16.6719	4.67e-07	0.0435	aaaagaaaaaggaaaatga
AT1G72360	HRE1	ERF	PeNAC023	519	539	+	17.6719	4.68e-07	0.0437	caccagccgccgccttggagt
AT2G20180	PIF1	bHLH	PeNAC091	809	822	-	17.7123	4.69e-07	0.0235	CTGAGGACACGTGG
AT4G38910	BPC5	BBR-BPC	PeNAC083	495	524	+	-21	4.69e-07	0.00063	aaaaaaagaaaaagaaaaagaaaaaaagag
AT1G43160	RAP2-6	ERF	PeNAC026	829	843	-	17.9062	4.7e-07	0.0302	CTGCGGCGGTGTCTG
AT1G72050	TFIIIA	C2H2	PeNAC017	719	737	-	17.4454	4.72e-07	0.00503	TAACCTCCTTCCCCTCCTC
AT1G72050	TFIIIA	C2H2	PeNAC019	719	737	-	17.4454	4.72e-07	0.00503	TAACCTCCTTCCCCTCCTC
AT2G28810	DOF2.2	Dof	PeNAC024	187	207	+	16.2969	4.75e-07	0.00683	tctttttttcttttctttttt
AT5G42520	BPC6	BBR-BPC	PeNAC095	228	248	+	12.8219	4.75e-07	0.00066	ttttctctctttctctcacct
AT3G02940	MYB107	MYB	PeNAC018	723	740	+	16.7812	4.76e-07	0.0977	taggtaggtggccgttct
AT5G17430	BBM	AP2	PeNAC062	405	424	-	17.4557	4.77e-07	0.00092	ACAGAAAAGAAAGAAAGAGA
AT5G17430	BBM	AP2	PeNAC102	165	184	+	17.4557	4.77e-07	0.00092	agaaaaaaaaaaaaaaaaaa
AT2G44840	ERF13	ERF	PeNAC060	240	254	+	18.5	4.78e-07	0.0359	gccagccgccatctt
AT5G66940	DOF5.8	Dof	PeNAC074	839	867	+	16.9375	4.78e-07	0.005	tcccttatctttccttctttttttttttt
AT2G45660	SOC1	MIKC_MADS	PeNAC061	642	662	+	17.087	4.79e-07	0.00064	tttttctttttttttttctgg
AT4G27950	CRF4	ERF	PeNAC089	588	608	+	16.9559	4.79e-07	0.0133	ccaccaccatcaccatctcgg
AT4G38910	BPC5	BBR-BPC	PeNAC008	867	896	-	-21.1013	4.8e-07	0.00064	GTAACTGGAGAGAGAGAGAGAAGGACAGAG
AT4G38910	BPC5	BBR-BPC	PeNAC025	643	672	-	-21.1139	4.81e-07	0.00064	GGGAAGAGAAAGACAGGGTTGGAGAGCGAT
AT4G38000	DOF4.7	Dof	PeNAC083	491	518	-	16.9375	4.81e-07	0.00288	TTTTCTTTTTCTTTTTCTTTTTTTTTTT
AT5G15830	AtbZIP3	bZIP	PeNAC101	865	879	+	18.25	4.82e-07	0.0408	tttgatgacgtgtcg
AT5G17430	BBM	AP2	PeNAC044	955	974	-	17.443	4.83e-07	0.00092	AGAGAGGAGAATGAGAGAGA
AT2G17180	ZAT2	C2H2	PeNAC081	658	667	-	16.1429	4.84e-07	0.0474	GCCAGCTGGG
AT3G50410	DOF3.4	Dof	PeNAC066	810	830	+	15.7656	4.85e-07	0.00643	ccttttcttttctagcttttc
AT4G38910	BPC5	BBR-BPC	PeNAC058	534	563	-	-21.1646	4.85e-07	0.00064	GTGGGTATTGTGGGAGAGAGAGAGAGAGAG
AT2G01930	BPC1	BBR-BPC	PeNAC044	970	993	-	12.6875	4.87e-07	0.00061	ATGGCGGATGGAGAGAGAGAGAGA
AT4G14770	TCX2	CPP	PeNAC037	463	477	-	17.1324	4.87e-07	0.101	TTTCGAAATTCGAAT
AT2G45660	SOC1	MIKC_MADS	PeNAC024	191	211	+	17.0725	4.88e-07	0.00064	tttttcttttctttttttttt
AT2G45660	SOC1	MIKC_MADS	PeNAC022	616	636	+	17.0725	4.88e-07	0.00064	ctcttttttcttctttttttt
AT2G45660	SOC1	MIKC_MADS	PeNAC061	641	661	+	17.0725	4.88e-07	0.00064	ttttttctttttttttttctg
AT4G38910	BPC5	BBR-BPC	PeNAC043	50	79	+	-21.2025	4.89e-07	0.00064	gattatatgtatagggagagagagagagat
AT1G49720	ABF1	bZIP	PeNAC094	617	635	-	16.8721	4.89e-07	0.0184	GGACACGTGTCGATACAAA
AT5G17430	BBM	AP2	PeNAC097	87	106	-	17.4304	4.89e-07	0.00092	AAAAAAGAAAAAGAAAAACA
AT5G17430	BBM	AP2	PeNAC013	109	128	-	17.4304	4.89e-07	0.00092	AAAAAAGAAAAAGAAAAACA
AT5G17430	BBM	AP2	PeNAC012	110	129	-	17.4304	4.89e-07	0.00092	AAAAAAGAAAAAGAAAAACA
AT1G49480	REM19	B3	PeNAC078	659	673	+	17.1912	4.94e-07	0.0026	gaaaaaaaaaaaaag
AT1G49480	REM19	B3	PeNAC074	855	869	-	17.1912	4.94e-07	0.0026	GAAAAAAAAAAAAAG
AT1G22810	ERF019	ERF	PeNAC073	815	829	-	17.9688	4.94e-07	0.0166	GATGGTGACGGTGAT
AT1G19040	AT1G19040	NAC	PeNAC011	614	629	+	18.375	4.95e-07	0.0128	ttacttgggttccaag
AT4G38910	BPC5	BBR-BPC	PeNAC074	555	584	-	-21.2658	4.96e-07	0.00065	GCATTAGCAGAGAGAGAGAGAGAGAGAAGA
AT5G17430	BBM	AP2	PeNAC020	277	296	+	17.4177	4.96e-07	0.00092	aaaaaaaaagaaaaaaaaaa
AT5G17430	BBM	AP2	PeNAC094	282	301	+	17.4177	4.96e-07	0.00092	aaaaaaaaaaggaaaaaaaa
AT5G42520	BPC6	BBR-BPC	PeNAC089	348	368	-	12.7123	4.97e-07	0.00068	GTATCTCTCTCTCTTTTTTTC
AT4G38000	DOF4.7	Dof	PeNAC020	275	302	-	16.9062	4.97e-07	0.00289	TTTTTATTTTTTTTTTCTTTTTTTTTTC
AT5G60130	AT5G60130	B3	PeNAC002	759	777	-	17.3438	4.97e-07	0.0254	AAGAAAAAACCAAGAAAAT
AT3G15210	ERF4	ERF	PeNAC023	522	536	+	18.0781	4.98e-07	0.0888	cagccgccgccttgg
AT5G22990	AT5G22990	C2H2	PeNAC032	287	301	+	16.5312	5.02e-07	0.102	tcgtcgtcgacatgg
AT2G01930	BPC1	BBR-BPC	PeNAC094	415	438	-	12.6094	5.03e-07	0.00062	ATGGGAGAGGGAGAGAGAGTGGAG
AT2G01930	BPC1	BBR-BPC	PeNAC101	493	516	+	12.6094	5.03e-07	0.00062	atgggagaggaaggaagagggaga
AT3G23250	MYB15	MYB	PeNAC010	622	642	-	17.0781	5.05e-07	0.0605	CATTGCTTCCGTCACCAACCT
AT2G45660	SOC1	MIKC_MADS	PeNAC062	412	432	+	17.0435	5.06e-07	0.00066	ctttcttttctgtttttttcc
AT5G04410	NAC078	NAC	PeNAC052	59	70	+	14.8191	5.06e-07	0.0661	ggacacgccact
AT5G38800	BZIP43	bZIP	PeNAC101	867	878	-	17.4186	5.06e-07	0.0341	GACACGTCATCA
AT2G01930	BPC1	BBR-BPC	PeNAC089	346	369	+	12.5938	5.06e-07	0.00062	tggaaaaaaagagagagagataca
AT2G40740	WRKY55	WRKY	PeNAC082	560	571	-	17.4531	5.07e-07	0.105	GCCGTTGACTTC
AT2G01930	BPC1	BBR-BPC	PeNAC101	499	522	+	12.5781	5.09e-07	0.00062	gaggaaggaagagggagataggag
AT3G17730	anac057	NAC	PeNAC057	179	195	+	17.7969	5.11e-07	0.0521	gacgtgacgtccaagca
AT3G17730	anac057	NAC	PeNAC058	482	498	+	17.7969	5.11e-07	0.0521	gacgtgacgtccaagca
AT5G67190	ERF010	ERF	PeNAC017	236	250	+	18.0156	5.12e-07	0.0211	ccatcggcaccgact
AT2G01930	BPC1	BBR-BPC	PeNAC043	55	78	+	12.5625	5.13e-07	0.00062	tatgtatagggagagagagagaga
AT1G67260	TCP1	TCP	PeNAC023	212	241	+	17.1772	5.13e-07	0.018	ggcggggcccacctaatgcttcttatggtc
AT5G51190	ERF105	ERF	PeNAC023	520	534	-	17.8281	5.15e-07	0.0647	AAGGCGGCGGCTGGT
AT2G45660	SOC1	MIKC_MADS	PeNAC061	451	471	+	17.029	5.15e-07	0.00067	ctcttctcttcttctctttct
AT5G42520	BPC6	BBR-BPC	PeNAC048	23	43	-	12.6164	5.16e-07	0.0007	CTCTCCCTCTCTCTGTGTCTT
AT5G17430	BBM	AP2	PeNAC089	350	369	+	17.3797	5.16e-07	0.00095	aaaaaagagagagagataca
AT1G67260	TCP1	TCP	PeNAC077	606	635	-	17.1646	5.16e-07	0.018	AGTGGGGCCCGTGAATTTGGATGAACCGGT
AT5G62940	DOF5.6	Dof	PeNAC024	195	215	-	15.9688	5.16e-07	0.0105	AAAAAAAAAAAAAAGAAAAGA
AT3G16280	AT3G16280	ERF	PeNAC016	325	338	-	17.5625	5.17e-07	0.0507	CTGTGTCGGCGGTG
AT3G16280	AT3G16280	ERF	PeNAC015	695	708	-	17.5625	5.17e-07	0.0507	CTGTGTCGGCGGTG
AT2G33710	AT2G33710	ERF	PeNAC026	829	843	+	17.7656	5.17e-07	0.0324	cagacaccgccgcag
AT1G68550	ERF118	ERF	PeNAC026	829	843	+	17.7344	5.19e-07	0.033	cagacaccgccgcag
AT1G49480	REM19	B3	PeNAC074	857	871	-	17.1471	5.19e-07	0.00267	GAGAAAAAAAAAAAA
AT5G47220	ERF2	ERF	PeNAC089	573	593	+	17.4844	5.2e-07	0.0173	taaccaccaccaccaccacca
AT2G01570	RGA	GRAS	PeNAC023	746	765	-	16.8429	5.22e-07	0.00221	GAGAGAGAGAGAGAGAGCGA
AT2G01930	BPC1	BBR-BPC	PeNAC074	850	873	-	12.5156	5.23e-07	0.00063	GAGAGAAAAAAAAAAAAAGAAGGA
AT5G17430	BBM	AP2	PeNAC011	330	349	+	17.3671	5.23e-07	0.00095	gggaaggaaagaaaaagaaa
AT2G40340	DREB2C	ERF	PeNAC073	809	829	-	17.0882	5.24e-07	0.0105	GATGGTGACGGTGATGGTGCG
AT3G47600	MYB94	MYB	PeNAC065	651	669	+	17.3906	5.25e-07	0.0375	gggatggtgggtgtgaaga
AT5G62380	NAC101	NAC	PeNAC057	176	196	-	17.8906	5.25e-07	0.0269	TTGCTTGGACGTCACGTCTGG
AT5G62380	NAC101	NAC	PeNAC058	479	499	-	17.8906	5.25e-07	0.0269	TTGCTTGGACGTCACGTCTGG
AT1G76420	NAC031	NAC	PeNAC057	180	197	+	17.9531	5.26e-07	0.0541	acgtgacgtccaagcaac
AT1G76420	NAC031	NAC	PeNAC058	483	500	+	17.9531	5.26e-07	0.0541	acgtgacgtccaagcaac
AT4G27950	CRF4	ERF	PeNAC089	585	605	+	16.7794	5.28e-07	0.0133	ccaccaccaccatcaccatct
AT5G66940	DOF5.8	Dof	PeNAC022	686	714	+	16.8438	5.3e-07	0.00527	tctttttttttcttttctttttgtcggat
AT4G32800	ERF043	ERF	PeNAC015	695	710	+	18.5312	5.32e-07	0.077	caccgccgacacagtt
AT2G45660	SOC1	MIKC_MADS	PeNAC003	386	406	+	17	5.33e-07	0.00069	tctctctctttttttttttta
AT1G49480	REM19	B3	PeNAC034	703	717	-	17.1029	5.36e-07	0.00268	GAAAGAAAAAAAAAA
AT5G17430	BBM	AP2	PeNAC091	536	555	-	17.3418	5.37e-07	0.00096	CAGGAAAAAAAAAAGAAAAA
AT5G17430	BBM	AP2	PeNAC102	166	185	+	17.3418	5.37e-07	0.00096	gaaaaaaaaaaaaaaaaaaa
AT2G46270	GBF3	bZIP	PeNAC014	733	747	+	18.2344	5.37e-07	0.0544	tgccacgtgtcccca
AT2G31230	ERF15	ERF	PeNAC001	797	811	-	17.8438	5.37e-07	0.0268	CGGTTCAGCCGCCGG
AT5G19790	RAP2-11	ERF	PeNAC053	765	779	-	17.8906	5.41e-07	0.0324	GCACCACAGCCGGCT
AT1G51700	DOF1.7	Dof	PeNAC061	631	651	-	15.6875	5.46e-07	0.00779	AAAAGAAAAAAGAAGAAAACA
AT1G51700	DOF1.7	Dof	PeNAC072	847	867	-	15.6875	5.46e-07	0.00779	AGAAAAAAAAAGGAAAGAAAA
AT4G38910	BPC5	BBR-BPC	PeNAC087	609	638	+	-21.7468	5.47e-07	0.00071	gagaacagtgagagagagagagaggggcta
AT4G27950	CRF4	ERF	PeNAC053	762	782	-	16.7059	5.49e-07	0.0133	CAGGCACCACAGCCGGCTCCG
AT5G17430	BBM	AP2	PeNAC082	894	913	+	17.3165	5.5e-07	0.00097	cagaaagagggaaggagaga
AT3G11280	AT3G11280	MYB	PeNAC081	255	268	+	15.7812	5.51e-07	0.114	atccttatctccat
AT3G47600	MYB94	MYB	PeNAC081	829	847	-	17.3438	5.52e-07	0.0375	GACAAGGTGGGTGAGGAAG
AT2G45660	SOC1	MIKC_MADS	PeNAC102	163	183	-	16.971	5.53e-07	0.0007	TTTTTTTTTTTTTTTTTCTGG
AT2G45660	SOC1	MIKC_MADS	PeNAC094	282	302	-	16.971	5.53e-07	0.0007	CTTTTTTTTCCTTTTTTTTTT
AT2G45660	SOC1	MIKC_MADS	PeNAC023	738	758	+	16.971	5.53e-07	0.0007	cttccctgtcgctctctctct
AT1G51220	WIP5	C2H2	PeNAC036	889	903	-	16.3125	5.53e-07	0.112	AGCCTGGAGAGGATG
AT1G44830	ERF014	ERF	PeNAC017	236	250	+	17.8594	5.53e-07	0.0128	ccatcggcaccgact
AT1G49480	REM19	B3	PeNAC014	986	1000	+	17.0882	5.53e-07	0.00269	gacgaaaaaaaaaaa
AT2G01930	BPC1	BBR-BPC	PeNAC061	212	235	-	12.375	5.54e-07	0.00066	GTGAGAGAAAGAGATAAAACAGGA
AT5G25390	SHN3	ERF	PeNAC073	809	829	+	15.4493	5.54e-07	0.00912	cgcaccatcaccgtcaccatc
AT2G44840	ERF13	ERF	PeNAC023	520	534	+	18.3125	5.55e-07	0.0359	accagccgccgcctt
AT5G18560	ERF086	ERF	PeNAC026	829	843	+	17.8906	5.56e-07	0.0374	cagacaccgccgcag
AT2G43000	JUB1	NAC	PeNAC021	604	623	+	17.8438	5.56e-07	0.105	ttccgttactaccccgcagc
AT4G38000	DOF4.7	Dof	PeNAC092	774	801	+	16.7969	5.57e-07	0.0031	cttcttctcttacattgttttctttttc
AT5G17430	BBM	AP2	PeNAC065	216	235	-	17.3038	5.57e-07	0.00098	AGGAAAAAAAGAAAAACAAA
AT1G59640	BPE	bHLH	PeNAC059	951	971	+	17.5781	5.58e-07	0.0299	caagccacacgtgtcttgcgc
AT3G10490	ANAC052	NAC	PeNAC007	582	601	+	17.9041	5.59e-07	0.0286	ttagcttggcaagcaagtca
AT3G10490	ANAC052	NAC	PeNAC008	588	607	+	17.9041	5.59e-07	0.0286	ttagcttggcaagcaagtca
AT2G45660	SOC1	MIKC_MADS	PeNAC020	276	296	-	16.9565	5.63e-07	0.0007	TTTTTTTTTTCTTTTTTTTTT
AT5G19790	RAP2-11	ERF	PeNAC023	519	533	+	17.8438	5.63e-07	0.0324	caccagccgccgcct
AT1G72050	TFIIIA	C2H2	PeNAC062	383	401	+	17.1681	5.64e-07	0.00527	cctctccccctccccccac
AT5G17430	BBM	AP2	PeNAC030	967	986	+	17.2911	5.65e-07	0.00098	aggaaggaaaagaagaaaaa
AT3G47620	TCP14	TCP	PeNAC075	707	726	+	11.8953	5.65e-07	0.0469	ttaaaccgtgtgggttccac
AT4G38000	DOF4.7	Dof	PeNAC083	492	519	-	16.7812	5.66e-07	0.0031	TTTTTCTTTTTCTTTTTCTTTTTTTTTT
AT5G61270	BHLH72	bHLH	PeNAC021	380	394	+	18.0274	5.69e-07	0.0381	ttgcttgccacgtgg
AT1G02250	NAC005	NAC	PeNAC011	614	632	+	17.5781	5.7e-07	0.117	ttacttgggttccaagtta
AT5G67580	TRB2	MYB_related	PeNAC068	703	721	-	16.9844	5.71e-07	0.117	AATTTTTAACCCTAATTTT
AT3G55370	OBP3	Dof	PeNAC094	364	384	+	16.5781	5.71e-07	0.00494	ttctcttttttttctttttgt
AT2G01570	RGA	GRAS	PeNAC060	757	776	-	16.7571	5.71e-07	0.00237	GAGAGGAAGAGAGAAGGGAC
AT1G69570	CDF5	Dof	PeNAC072	850	876	+	17.0625	5.72e-07	0.00489	tctttcctttttttttctctctctatt
AT4G38910	BPC5	BBR-BPC	PeNAC044	106	135	-	-21.962	5.72e-07	0.00074	GGTGAGTGCGAGTGAGTTTGAGAGAGGGAG
AT2G45420	LBD18	LBD	PeNAC051	769	787	+	17.2344	5.72e-07	0.112	ccaccggcgtagtcaccgg
AT5G17430	BBM	AP2	PeNAC003	388	407	-	17.2785	5.73e-07	0.00099	GTAAAAAAAAAAAAGAGAGA
AT2G45660	SOC1	MIKC_MADS	PeNAC097	85	105	+	16.942	5.73e-07	0.0007	tctgtttttctttttcttttt
AT2G45660	SOC1	MIKC_MADS	PeNAC013	107	127	+	16.942	5.73e-07	0.0007	tctgtttttctttttcttttt
AT2G45660	SOC1	MIKC_MADS	PeNAC012	108	128	+	16.942	5.73e-07	0.0007	tctgtttttctttttcttttt
AT2G45660	SOC1	MIKC_MADS	PeNAC034	695	715	+	16.942	5.73e-07	0.0007	gtttttttttttttttttctt
AT1G72050	TFIIIA	C2H2	PeNAC063	337	355	+	17.1429	5.73e-07	0.00527	ccccaccctccactccccc
AT5G07680	NAC079	NAC	PeNAC052	49	69	-	17.9062	5.75e-07	0.118	GTGGCGTGTCCGGTAAGGCAA
AT5G67190	ERF010	ERF	PeNAC056	547	561	+	17.875	5.76e-07	0.0211	ctacagccaccgcct
AT1G72050	TFIIIA	C2H2	PeNAC101	497	515	-	17.1345	5.76e-07	0.00527	CTCCCTCTTCCTTCCTCTC
AT5G42520	BPC6	BBR-BPC	PeNAC094	422	442	+	12.3288	5.77e-07	0.00078	ctctctccctctcccattccc
AT1G71450	ERF021	ERF	PeNAC089	571	590	+	17.2656	5.77e-07	0.00878	tgtaaccaccaccaccacca
AT1G29160	DOF1.5	Dof	PeNAC083	494	514	+	16.0469	5.79e-07	0.028	aaaaaaaagaaaaagaaaaag
AT2G01930	BPC1	BBR-BPC	PeNAC025	701	724	-	12.2656	5.8e-07	0.00069	GATAGAGAGAGAGAGATTGGACCT
AT1G53230	TCP3	TCP	PeNAC023	213	225	+	18.6562	5.82e-07	0.0323	gcggggcccacct
AT5G47230	ERF5	ERF	PeNAC014	473	487	+	17.2969	5.82e-07	0.0142	ccacctcctccaccg
AT4G38910	BPC5	BBR-BPC	PeNAC025	696	725	-	-22.038	5.83e-07	0.00075	AGATAGAGAGAGAGAGATTGGACCTGTGTG
AT1G51700	DOF1.7	Dof	PeNAC045	16	36	-	15.6406	5.85e-07	0.00779	AAAACAAAAAAGGGGAAAAAG
AT2G01930	BPC1	BBR-BPC	PeNAC015	383	406	+	12.2344	5.88e-07	0.0007	tatatatagagagagagagtgggt
AT4G16150	CAMTA5	CAMTA	PeNAC039	127	144	-	17.1719	5.88e-07	0.118	CCGTGTGCTATCCGTGGG
AT1G69570	CDF5	Dof	PeNAC094	362	388	+	17.0312	5.89e-07	0.00489	ttttctcttttttttctttttgttcgg
AT1G44830	ERF014	ERF	PeNAC024	603	617	+	17.7812	5.9e-07	0.0128	tccaagccaccgcca
AT1G29160	DOF1.5	Dof	PeNAC094	362	382	-	16.0312	5.91e-07	0.028	AAAAAGAAAAAAAAGAGAAAA
AT1G49720	ABF1	bZIP	PeNAC032	381	399	+	16.4302	5.91e-07	0.0185	ggcgacgtgtcgcccgtgt
AT2G03710	AGL3	MIKC_MADS	PeNAC015	119	136	+	16.2405	5.91e-07	0.122	gtagccatatatagatag
AT1G49480	REM19	B3	PeNAC036	225	239	-	17.0294	5.92e-07	0.00269	CCAAAAAAAAAAAAA
AT1G49480	REM19	B3	PeNAC089	774	788	+	17.0294	5.92e-07	0.00269	gacaaaaaaaaaaac
AT1G49480	REM19	B3	PeNAC086	808	822	+	17.0294	5.92e-07	0.00269	ccaaaaaaaaaaaaa
AT2G45660	SOC1	MIKC_MADS	PeNAC074	533	553	+	16.913	5.93e-07	0.00072	ccttagtctctctctctctct
AT4G38000	DOF4.7	Dof	PeNAC062	246	273	-	16.7344	5.94e-07	0.00312	TTCTTTTCTCTTCTTTTCTTCCTTTTAT
AT4G16750	ERF039	ERF	PeNAC019	234	248	+	17.625	5.94e-07	0.0287	catcggcaccgacga
AT5G67190	ERF010	ERF	PeNAC024	603	617	+	17.8438	5.94e-07	0.0211	tccaagccaccgcca
AT5G17430	BBM	AP2	PeNAC061	189	208	-	17.2405	5.94e-07	0.00101	AAGGGGAAGGGAAAGAGAAG
AT3G50260	ERF011	ERF	PeNAC017	236	250	+	17.8438	5.94e-07	0.0174	ccatcggcaccgact
AT5G66940	DOF5.8	Dof	PeNAC094	280	308	-	16.7344	5.98e-07	0.00549	ATGCACCTTTTTTTTCCTTTTTTTTTTTG
AT4G31060	ERF015	ERF	PeNAC015	697	716	+	17.9375	5.98e-07	0.0576	ccgccgacacagttaatgca
AT3G10480	ANAC050	NAC	PeNAC011	617	632	+	18.3438	5.99e-07	0.0342	cttgggttccaagtta
AT1G53910	RAP2-12	ERF	PeNAC103	479	499	+	17.4844	6e-07	0.0568	cggtttgtacggcggaggagg
AT5G67190	ERF010	ERF	PeNAC073	810	824	+	17.8281	6.01e-07	0.0211	gcaccatcaccgtca
AT1G77640	ERF013	ERF	PeNAC089	575	595	-	17.9531	6.02e-07	0.049	GGTGGTGGTGGTGGTGGTGGT
AT2G45660	SOC1	MIKC_MADS	PeNAC094	283	303	-	16.8986	6.03e-07	0.00072	CCTTTTTTTTCCTTTTTTTTT
AT2G45660	SOC1	MIKC_MADS	PeNAC094	364	384	+	16.8986	6.03e-07	0.00072	ttctcttttttttctttttgt
AT5G47230	ERF5	ERF	PeNAC056	547	561	+	17.2344	6.04e-07	0.0142	ctacagccaccgcct
AT1G53910	RAP2-12	ERF	PeNAC081	582	602	-	17.4688	6.06e-07	0.0568	TAGGAAAGATGGCGGCTGGGA
AT3G20310	ERF7	ERF	PeNAC041	145	165	+	17.2969	6.07e-07	0.0135	gtgcctctgacttcgccgtca
AT2G01570	RGA	GRAS	PeNAC095	225	244	-	16.7	6.07e-07	0.00242	GAGAGAAAGAGAGAAAACAG
AT2G01570	RGA	GRAS	PeNAC082	900	919	+	16.7	6.07e-07	0.00242	gagggaaggagagaggaagg
AT5G07310	ERF115	ERF	PeNAC051	772	786	+	17.2969	6.08e-07	0.0222	ccggcgtagtcaccg
AT5G66940	DOF5.8	Dof	PeNAC055	208	236	+	16.7188	6.08e-07	0.00549	tctgtgtctcttttctcttttttttttcc
AT1G44830	ERF014	ERF	PeNAC073	810	824	+	17.7344	6.08e-07	0.0128	gcaccatcaccgtca
AT1G31140	AGL63	MIKC_MADS	PeNAC051	212	226	-	17.625	6.08e-07	0.125	TGCCAAAATGGGAAA
AT3G50260	ERF011	ERF	PeNAC056	547	561	+	17.8125	6.09e-07	0.0174	ctacagccaccgcct
AT1G74480	RKD2	Nin-like	PeNAC088	439	457	-	17.6875	6.09e-07	0.049	GAGCCGATTCACCTTCTCA
AT3G45610	DOF3.2	Dof	PeNAC102	235	253	-	15.7969	6.12e-07	0.0405	TTTCCTTTTTCTTTTTATT
AT5G15830	AtbZIP3	bZIP	PeNAC078	538	552	-	17.9062	6.13e-07	0.0408	TGGGATGACGTGGAA
AT3G22170	FHY3	FAR1	PeNAC105	420	431	-	17.7206	6.14e-07	0.0408	CCCACGCGCCTA
AT2G45660	SOC1	MIKC_MADS	PeNAC072	562	582	+	16.8841	6.14e-07	0.00073	ctctcttttctctctctctgc
AT4G17980	anac071	NAC	PeNAC067	648	662	-	17.0781	6.14e-07	0.104	GGCGTGGAGGTGAAG
AT5G03150	JKD	C2H2	PeNAC046	925	944	+	17.6719	6.16e-07	0.0743	ccttgttttgtcgtttttag
AT4G38910	BPC5	BBR-BPC	PeNAC057	211	240	-	-22.3291	6.17e-07	0.00078	AGAGAGAGAGATAGAGAGAATAAGGTTTCT
AT4G38910	BPC5	BBR-BPC	PeNAC058	514	543	-	-22.3291	6.17e-07	0.00078	AGAGAGAGAGATAGAGAGAATAAGGTTTCT
AT4G36730	GBF1	bZIP	PeNAC023	266	275	-	15.3368	6.18e-07	0.0303	CCACGTGGCA
AT4G36730	GBF1	bZIP	PeNAC021	385	394	-	15.3368	6.18e-07	0.0303	CCACGTGGCA
AT2G01930	BPC1	BBR-BPC	PeNAC089	352	375	+	12.1094	6.19e-07	0.00073	aaaagagagagagatacaggtagg
AT3G04070	NAC047	NAC	PeNAC023	726	740	-	15.625	6.19e-07	0.111	AAGTGACGTGAACAA
AT4G18960	AG	MIKC_MADS	PeNAC051	209	227	+	16.5882	6.21e-07	0.127	atttttcccattttggcaa
AT2G01930	BPC1	BBR-BPC	PeNAC095	425	448	-	12.0938	6.23e-07	0.00073	GGGAGAGAGGAAAAGAGAGAACTG
AT4G38000	DOF4.7	Dof	PeNAC065	206	233	+	16.6875	6.23e-07	0.00312	tctttttttttttgtttttctttttttc
AT5G18090	AT5G18090	B3	PeNAC005	616	630	+	15.3425	6.24e-07	0.109	ggagatgaacaggag
AT5G02460	DOF5.1	Dof	PeNAC105	433	453	+	16.5938	6.25e-07	0.00556	gaaaaagcagagagaaaagct
AT5G42520	BPC6	BBR-BPC	PeNAC074	857	877	+	12.1233	6.25e-07	0.00084	ttttttttttttctctctcta
AT4G23750	CRF2	ERF	PeNAC023	525	532	+	18.5426	6.26e-07	0.115	ccgccgcc
AT3G16770	RAP2-3	ERF	PeNAC026	749	756	-	17.8558	6.26e-07	0.116	GCGCCGCC
AT1G28360	ERF12	ERF	PeNAC025	269	276	+	18.875	6.26e-07	0.0569	cgccgccg
AT1G28360	ERF12	ERF	PeNAC026	748	755	-	18.875	6.26e-07	0.0569	CGCCGCCG
AT1G06160	ERF094	ERF	PeNAC025	269	276	+	18.0851	6.26e-07	0.0475	cgccgccg
AT1G06160	ERF094	ERF	PeNAC026	748	755	-	18.0851	6.26e-07	0.0475	CGCCGCCG
AT1G72360	HRE1	ERF	PeNAC023	516	536	+	17.1406	6.26e-07	0.0437	cgtcaccagccgccgccttgg
AT2G01930	BPC1	BBR-BPC	PeNAC018	973	996	-	12.0781	6.27e-07	0.00073	GAGAGAGAGAGAGAGAGCAGAGCG
AT1G21910	ERF012	ERF	PeNAC064	430	449	+	17.8281	6.27e-07	0.0254	caagggttatctccaccgac
AT2G18160	BZIP2	bZIP	PeNAC101	865	879	+	17.8125	6.27e-07	0.0429	tttgatgacgtgtcg
AT3G10580	AT3G10580	MYB_related	PeNAC056	904	918	+	16.2027	6.29e-07	0.0818	ggattggataagcat
AT5G62940	DOF5.6	Dof	PeNAC039	942	962	-	15.8281	6.33e-07	0.0114	AAAAAATCCAAAAAGCAGAAA
AT4G36620	GATA19	GATA	PeNAC089	825	835	-	16.6575	6.33e-07	0.0636	CTGATCGGATC
AT4G38000	DOF4.7	Dof	PeNAC034	692	719	+	16.6719	6.33e-07	0.00312	atcgtttttttttttttttttctttctc
AT4G38000	DOF4.7	Dof	PeNAC038	556	583	-	16.6719	6.33e-07	0.00312	CCCCTTTTCTTTCTTTGGCTACTTTTTG
AT2G18160	BZIP2	bZIP	PeNAC078	538	552	-	17.7969	6.33e-07	0.0429	TGGGATGACGTGGAA
AT2G01570	RGA	GRAS	PeNAC021	827	846	-	16.6571	6.35e-07	0.00248	GAGAGAGAGAGAGGGGAAGG
AT1G44830	ERF014	ERF	PeNAC103	488	502	-	17.6719	6.35e-07	0.0128	ACGCCTCCTCCGCCG
AT2G45660	SOC1	MIKC_MADS	PeNAC022	294	314	+	16.8551	6.36e-07	0.00075	gctctctctctctctctctat
AT5G02460	DOF5.1	Dof	PeNAC002	90	110	-	16.5781	6.37e-07	0.00556	AAAAAAGAGGAGAGAAAAGCA
AT5G04410	NAC078	NAC	PeNAC081	347	358	+	14.7766	6.42e-07	0.0661	caacacgccaca
AT5G43840	HSFA6A	HSF	PeNAC069	579	594	+	18.0625	6.43e-07	0.071	gaacattctagaatac
AT4G28140	ERF054	ERF	PeNAC019	227	246	-	17.5781	6.46e-07	0.0171	GTCGGTGCCGATGGGCAGAC
AT4G28140	ERF054	ERF	PeNAC017	230	249	-	17.5781	6.46e-07	0.0171	GTCGGTGCCGATGGGCAGAC
AT3G55370	OBP3	Dof	PeNAC060	609	629	+	16.4688	6.47e-07	0.00537	ttatcttttttattttctttt
AT5G66730	IDD1	C2H2	PeNAC005	587	603	-	17.7969	6.48e-07	0.0656	GACAAAACGACAAACCA
AT5G11260	HY5	bZIP	PeNAC078	538	552	-	17.9531	6.48e-07	0.0405	TGGGATGACGTGGAA
AT5G17430	BBM	AP2	PeNAC091	533	552	-	17.1519	6.5e-07	0.00109	GAAAAAAAAAAGAAAAAAGA
AT5G17430	BBM	AP2	PeNAC022	618	637	-	17.1519	6.5e-07	0.00109	AAAAAAAAAGAAGAAAAAAG
AT5G44210	ERF9	ERF	PeNAC089	585	605	-	16.7344	6.52e-07	0.0254	AGATGGTGATGGTGGTGGTGG
AT2G01930	BPC1	BBR-BPC	PeNAC087	608	631	+	11.9688	6.56e-07	0.00076	tgagaacagtgagagagagagaga
AT2G35700	ERF038	ERF	PeNAC064	436	450	-	17.6406	6.57e-07	0.0318	CGTCGGTGGAGATAA
AT5G07310	ERF115	ERF	PeNAC103	488	502	-	17.1719	6.58e-07	0.0222	ACGCCTCCTCCGCCG
AT2G45660	SOC1	MIKC_MADS	PeNAC018	926	946	+	16.8261	6.58e-07	0.00077	tttctgtttttgtcttctttt
AT2G45660	SOC1	MIKC_MADS	PeNAC030	970	990	-	16.8261	6.58e-07	0.00077	CCTTTTTTTCTTCTTTTCCTT
AT3G50410	DOF3.4	Dof	PeNAC069	728	748	-	15.5625	6.58e-07	0.00789	CCCCTTTCTCTTACCCTTTTT
AT5G42520	BPC6	BBR-BPC	PeNAC061	217	237	+	11.9863	6.59e-07	0.00088	ttttatctctttctctcacac
AT5G66940	DOF5.8	Dof	PeNAC060	597	625	+	16.6406	6.61e-07	0.00571	ttttttatcattttatcttttttattttc
AT2G01570	RGA	GRAS	PeNAC018	975	994	-	16.6143	6.63e-07	0.00254	GAGAGAGAGAGAGAGCAGAG
AT4G38000	DOF4.7	Dof	PeNAC024	183	210	+	16.625	6.64e-07	0.00315	tctctctttttttcttttcttttttttt
AT3G60490	ERF035	ERF	PeNAC016	327	340	-	18.1562	6.64e-07	0.0653	TACTGTGTCGGCGG
AT2G20180	PIF1	bHLH	PeNAC094	488	501	-	17.411	6.64e-07	0.0263	TGCTGGACACGTGG
AT2G40340	DREB2C	ERF	PeNAC014	472	492	-	16.6765	6.65e-07	0.0121	TAAAACGGTGGAGGAGGTGGA
AT3G10480	ANAC050	NAC	PeNAC011	614	629	-	18.2188	6.65e-07	0.0342	CTTGGAACCCAAGTAA
AT1G28160	ERF087	ERF	PeNAC026	829	843	-	17.4375	6.65e-07	0.0419	CTGCGGCGGTGTCTG
AT5G17430	BBM	AP2	PeNAC023	754	773	-	17.1266	6.66e-07	0.00111	ACGAGAGAGAGAGAGAGAGA
AT2G01930	BPC1	BBR-BPC	PeNAC102	389	412	-	11.9219	6.68e-07	0.00076	GAGAAAATAAGATAGGGAGAGATT
AT2G01930	BPC1	BBR-BPC	PeNAC082	902	925	+	11.9219	6.68e-07	0.00076	gggaaggagagaggaaggctgaga
AT1G53230	TCP3	TCP	PeNAC076	83	95	-	18.5	6.69e-07	0.0323	AAGGGGACCACAT
AT2G45660	SOC1	MIKC_MADS	PeNAC053	570	590	+	16.8116	6.7e-07	0.00078	cttttctttctttttccttgt
AT3G20310	ERF7	ERF	PeNAC053	759	779	-	17.1406	6.71e-07	0.0135	GCACCACAGCCGGCTCCGTCT
AT3G50410	DOF3.4	Dof	PeNAC024	186	206	+	15.5469	6.73e-07	0.00789	ctctttttttcttttcttttt
AT4G38000	DOF4.7	Dof	PeNAC061	633	660	+	16.6094	6.74e-07	0.00315	ttttcttcttttttctttttttttttct
AT1G69570	CDF5	Dof	PeNAC065	192	218	+	16.8906	6.74e-07	0.00538	cctcttctttttgctcttttttttttt
AT4G17490	ERF6	ERF	PeNAC089	576	596	+	16.3594	6.75e-07	0.0339	ccaccaccaccaccaccacca
AT1G14580	AT1G14580	C2H2	PeNAC005	584	603	+	17.6176	6.76e-07	0.134	gtctggtttgtcgttttgtc
AT5G62940	DOF5.6	Dof	PeNAC066	62	82	-	15.7812	6.76e-07	0.0114	GAAGAGGATAAAAAGGAAAGA
AT5G25390	SHN3	ERF	PeNAC053	763	783	-	15.0435	6.78e-07	0.00964	ACAGGCACCACAGCCGGCTCC
AT5G19790	RAP2-11	ERF	PeNAC031	784	798	-	17.6094	6.79e-07	0.0324	CCTACGTTGCCGGCC
AT5G51190	ERF105	ERF	PeNAC081	583	597	-	17.3281	6.8e-07	0.0647	AAGATGGCGGCTGGG
AT2G45660	SOC1	MIKC_MADS	PeNAC091	535	555	+	16.7971	6.81e-07	0.00078	ttttttcttttttttttcctg
AT2G45660	SOC1	MIKC_MADS	PeNAC038	732	752	+	16.7971	6.81e-07	0.00078	tttcattgtttttttttctct
AT2G45660	SOC1	MIKC_MADS	PeNAC007	872	892	+	16.7971	6.81e-07	0.00078	tctctctctctctctctccag
AT1G34370	STOP1	C2H2	PeNAC070	468	482	-	16.5625	6.82e-07	0.137	ACCTTCCCCGAATAT
AT5G25390	SHN3	ERF	PeNAC063	900	920	+	15.029	6.83e-07	0.00964	ttctccttctccttctcctcc
AT4G05100	AtMYB74	MYB	PeNAC018	722	735	-	16.411	6.83e-07	0.141	GGCCACCTACCTAC
AT5G17430	BBM	AP2	PeNAC094	359	378	-	17.1013	6.84e-07	0.00113	AGAAAAAAAAGAGAAAAAGA
AT1G55110	IDD7	C2H2	PeNAC005	586	603	-	17.7188	6.84e-07	0.102	GACAAAACGACAAACCAG
AT2G22750	AT2G22750	bHLH	PeNAC073	719	735	-	17.6027	6.85e-07	0.0302	CACGTGGTGAACGTGCC
AT1G72050	TFIIIA	C2H2	PeNAC067	702	720	+	16.8571	6.87e-07	0.006	ccgcaccctcttcgccctc
AT5G61600	ERF104	ERF	PeNAC089	574	592	+	16.9688	6.9e-07	0.0206	aaccaccaccaccaccacc
AT5G43840	HSFA6A	HSF	PeNAC070	437	452	+	17.9531	6.91e-07	0.071	gaacattctagaatgc
AT2G45660	SOC1	MIKC_MADS	PeNAC072	849	869	+	16.7826	6.93e-07	0.00078	ttctttcctttttttttctct
AT2G28810	DOF2.2	Dof	PeNAC020	280	300	-	16.0156	6.94e-07	0.00873	TTTATTTTTTTTTTCTTTTTT
AT2G28810	DOF2.2	Dof	PeNAC065	211	231	+	16.0156	6.94e-07	0.00873	ttttttttgtttttctttttt
AT4G18890	BEH3	BES1	PeNAC101	695	705	+	18.0625	6.94e-07	0.119	tgcacgtgtcg
AT1G50640	ERF3	ERF	PeNAC026	829	843	-	17.3281	6.95e-07	0.0457	CTGCGGCGGTGTCTG
AT5G42520	BPC6	BBR-BPC	PeNAC062	400	420	+	11.8493	6.95e-07	0.00092	acatctctctttctttctttt
AT5G42520	BPC6	BBR-BPC	PeNAC072	856	876	+	11.8493	6.95e-07	0.00092	ctttttttttctctctctatt
AT5G47230	ERF5	ERF	PeNAC103	485	499	-	17	6.97e-07	0.0142	CCTCCTCCGCCGTAC
AT5G47230	ERF5	ERF	PeNAC023	522	536	+	17	6.97e-07	0.0142	cagccgccgccttgg
AT4G38910	BPC5	BBR-BPC	PeNAC074	851	880	-	-22.9367	6.98e-07	0.00088	AAATAGAGAGAGAAAAAAAAAAAAAGAAGG
AT4G34410	ERF109	ERF	PeNAC025	269	283	-	17.7344	6.99e-07	0.0755	CCAGTTTCGGCGGCG
AT5G17430	BBM	AP2	PeNAC061	640	659	-	17.0759	7.01e-07	0.00115	GAAAAAAAAAAAGAAAAAAG
AT4G38000	DOF4.7	Dof	PeNAC029	620	647	+	16.5625	7.07e-07	0.00315	cagatttttttcattctttttctttttt
AT5G08330	TCP21	TCP	PeNAC094	801	814	+	17.7656	7.07e-07	0.0347	agtgggcccccact
AT3G27010	TCP20	TCP	PeNAC023	213	233	-	17.3594	7.08e-07	0.0273	GAAGCATTAGGTGGGCCCCGC
AT5G17430	BBM	AP2	PeNAC020	275	294	+	17.0633	7.09e-07	0.00115	gaaaaaaaaaagaaaaaaaa
AT1G34190	NAC017	NAC	PeNAC011	611	629	+	18.3594	7.09e-07	0.0291	gagttacttgggttccaag
AT1G59640	BPE	bHLH	PeNAC085	742	762	-	17.3438	7.09e-07	0.0299	AAAGGGGCACGTGGCAAGCAA
AT5G47230	ERF5	ERF	PeNAC053	762	776	-	16.9688	7.11e-07	0.0142	CCACAGCCGGCTCCG
AT2G01930	BPC1	BBR-BPC	PeNAC044	103	126	-	11.7656	7.12e-07	0.00081	GAGTGAGTTTGAGAGAGGGAGACC
AT4G38910	BPC5	BBR-BPC	PeNAC084	261	290	-	-23.0253	7.13e-07	0.00089	AAATTAATATATAGAAAAAGAGAGAGAGTG
AT3G10490	ANAC052	NAC	PeNAC011	614	633	-	17.5753	7.14e-07	0.0293	ATAACTTGGAACCCAAGTAA
AT4G38000	DOF4.7	Dof	PeNAC042	697	724	+	16.5469	7.18e-07	0.00315	tttttctttcttactctgtagcttttcc
AT4G38000	DOF4.7	Dof	PeNAC088	832	859	-	16.5469	7.18e-07	0.00315	TCTTTTTTTCTTCTTCCTTCACTTTTAT
AT5G66940	DOF5.8	Dof	PeNAC062	400	428	+	16.5625	7.19e-07	0.00595	acatctctctttctttcttttctgttttt
AT1G51700	DOF1.7	Dof	PeNAC022	619	639	-	15.5	7.2e-07	0.00836	CGAAAAAAAAAGAAGAAAAAA
AT5G63090	LOB	LBD	PeNAC053	763	783	-	16.4062	7.2e-07	0.0326	ACAGGCACCACAGCCGGCTCC
AT4G38910	BPC5	BBR-BPC	PeNAC044	969	998	-	-23.0759	7.2e-07	0.00089	TAGTAATGGCGGATGGAGAGAGAGAGAGAG
AT5G39610	NAC92	NAC	PeNAC094	491	505	+	17.2969	7.28e-07	0.15	cgtgtccagcacgtt
AT2G45660	SOC1	MIKC_MADS	PeNAC083	500	520	-	16.7391	7.29e-07	0.00082	TTTTTTCTTTTTCTTTTTCTT
AT5G28770	BZIP63	bZIP	PeNAC001	528	539	+	16.4149	7.29e-07	0.11	tgatgacgtggc
AT1G43160	RAP2-6	ERF	PeNAC103	488	502	+	17.2031	7.3e-07	0.0352	cggcggaggaggcgt
AT2G02070	IDD5	C2H2	PeNAC005	588	603	+	17.5753	7.31e-07	0.146	ggtttgtcgttttgtc
AT3G10800	BZIP28	bZIP	PeNAC101	865	879	+	17.6562	7.33e-07	0.0378	tttgatgacgtgtcg
AT5G05550	AT5G05550	Trihelix	PeNAC089	611	625	+	17.5	7.34e-07	0.105	aatcaccggcggcag
AT1G74480	RKD2	Nin-like	PeNAC031	980	998	-	17.4219	7.34e-07	0.049	CCGACTTTTCACGTTCCTG
AT1G10120	BHLH74	bHLH	PeNAC094	483	503	-	17.5753	7.35e-07	0.0819	CGTGCTGGACACGTGGAGGTT
AT1G51700	DOF1.7	Dof	PeNAC053	570	590	-	15.4844	7.36e-07	0.00836	ACAAGGAAAAAGAAAGAAAAG
AT5G17430	BBM	AP2	PeNAC083	506	525	+	17.0253	7.37e-07	0.00118	aagaaaaagaaaaaaagagt
AT1G72010	TCP22	TCP	PeNAC101	665	677	+	17.8125	7.4e-07	0.0316	atgtggtccccac
AT2G45660	SOC1	MIKC_MADS	PeNAC055	215	235	+	16.7246	7.42e-07	0.00082	ctcttttctcttttttttttc
AT2G45660	SOC1	MIKC_MADS	PeNAC094	361	381	+	16.7246	7.42e-07	0.00082	tttttctcttttttttctttt
AT3G20310	ERF7	ERF	PeNAC019	649	669	-	16.9844	7.42e-07	0.0135	CCGCCTACAGCCCCACCACCA
AT3G20310	ERF7	ERF	PeNAC017	649	669	-	16.9844	7.42e-07	0.0135	CCGCCTACAGCCCCACCACCA
AT2G33710	AT2G33710	ERF	PeNAC103	488	502	-	17.1719	7.43e-07	0.0349	ACGCCTCCTCCGCCG
AT1G59640	BPE	bHLH	PeNAC094	482	502	+	17.2969	7.43e-07	0.0299	caacctccacgtgtccagcac
AT5G18450	DREB2G	ERF	PeNAC089	587	601	-	17.3594	7.45e-07	0.0267	GGTGATGGTGGTGGT
AT1G03800	ERF10	ERF	PeNAC073	806	826	+	16.9844	7.45e-07	0.0197	acccgcaccatcaccgtcacc
AT2G01930	BPC1	BBR-BPC	PeNAC095	229	252	-	11.6562	7.45e-07	0.00084	GTTTAGGTGAGAGAAAGAGAGAAA
AT4G17490	ERF6	ERF	PeNAC081	579	599	+	16.1406	7.45e-07	0.0339	cattcccagccgccatctttc
AT2G42280	AT2G42280	bHLH	PeNAC096	420	430	-	16.7945	7.48e-07	0.155	GGCCACTTGCT
AT1G49480	REM19	B3	PeNAC078	90	104	-	16.8235	7.48e-07	0.00319	AAAAAAAAAAAAAAG
AT1G49480	REM19	B3	PeNAC024	201	215	-	16.8235	7.48e-07	0.00319	AAAAAAAAAAAAAAG
AT1G49480	REM19	B3	PeNAC086	812	826	+	16.8235	7.48e-07	0.00319	aaaaaaaaaaaaaag
AT5G02460	DOF5.1	Dof	PeNAC034	699	719	-	16.4375	7.49e-07	0.00623	GAGAAAGAAAAAAAAAAAAAA
AT1G72050	TFIIIA	C2H2	PeNAC059	823	841	-	16.7143	7.52e-07	0.00628	CCTCTTTTTCTCCCTCATC
AT1G72010	TCP22	TCP	PeNAC023	211	223	+	17.7969	7.52e-07	0.0316	aggcggggcccac
AT3G23210	BHLH34	bHLH	PeNAC014	727	749	-	17.3438	7.53e-07	0.0229	GCTGGGGACACGTGGCAAGCGTT
AT1G51700	DOF1.7	Dof	PeNAC094	351	371	-	15.4688	7.53e-07	0.00836	AAAGAGAAAAAGAAAAGAGGG
AT5G56110	MYB80	MYB	PeNAC080	82	96	-	15.7812	7.54e-07	0.155	TAGAGTTAGGTGAAA
AT2G45660	SOC1	MIKC_MADS	PeNAC084	254	274	+	16.7101	7.54e-07	0.00083	tctctctcactctctctcttt
AT5G62940	DOF5.6	Dof	PeNAC094	362	382	-	15.7031	7.54e-07	0.0114	AAAAAGAAAAAAAAGAGAAAA
AT5G17430	BBM	AP2	PeNAC079	58	77	+	17	7.56e-07	0.00121	aaaaacaaagagaggagaga
AT1G75490	DREB2D	ERF	PeNAC089	585	599	+	17.2969	7.58e-07	0.0212	ccaccaccaccatca
AT3G55370	OBP3	Dof	PeNAC011	330	350	-	16.3281	7.59e-07	0.00604	TTTTCTTTTTCTTTCCTTCCC
AT2G01930	BPC1	BBR-BPC	PeNAC015	381	404	+	11.6094	7.59e-07	0.00085	tatatatatagagagagagagtgg
AT4G38000	DOF4.7	Dof	PeNAC062	247	274	-	16.4844	7.65e-07	0.00322	CTTCTTTTCTCTTCTTTTCTTCCTTTTA
AT2G24570	WRKY17	WRKY	PeNAC082	558	571	+	17.3973	7.66e-07	0.156	gtgaagtcaacggc
AT2G45660	SOC1	MIKC_MADS	PeNAC059	827	847	-	16.6957	7.67e-07	0.00084	CTTTCTCCTCTTTTTCTCCCT
AT5G66940	DOF5.8	Dof	PeNAC040	247	275	-	16.5	7.69e-07	0.00607	GAGTTCTTTTTTTTTCCTTTTTTGCAGTA
AT1G29160	DOF1.5	Dof	PeNAC102	235	255	+	15.8281	7.71e-07	0.028	aataaaaagaaaaaggaaaat
AT1G69570	CDF5	Dof	PeNAC060	607	633	+	16.75	7.71e-07	0.00562	ttttatcttttttattttctttttgat
AT5G67190	ERF010	ERF	PeNAC016	321	335	+	17.5312	7.74e-07	0.0211	cgtgcaccgccgaca
AT5G67190	ERF010	ERF	PeNAC015	691	705	+	17.5312	7.74e-07	0.0211	cgtgcaccgccgaca
AT5G17430	BBM	AP2	PeNAC084	260	279	-	16.9747	7.74e-07	0.00122	TAGAAAAAGAGAGAGAGTGA
AT2G01930	BPC1	BBR-BPC	PeNAC102	820	843	-	11.5625	7.74e-07	0.00086	TAAATAGAGAGAGAGAGAGGAGAG
AT5G02460	DOF5.1	Dof	PeNAC062	255	275	+	16.4062	7.76e-07	0.00623	agaaaagaagagaaaagaagg
AT4G38000	DOF4.7	Dof	PeNAC024	184	211	+	16.4688	7.77e-07	0.00322	ctctctttttttcttttctttttttttt
AT3G26620	LBD23	LBD	PeNAC104	556	570	+	17.3125	7.79e-07	0.153	ggcgtgccccccgct
AT5G07310	ERF115	ERF	PeNAC089	576	590	+	16.9062	7.79e-07	0.0222	ccaccaccaccacca
AT5G07310	ERF115	ERF	PeNAC089	579	593	+	16.9062	7.79e-07	0.0222	ccaccaccaccacca
AT5G07310	ERF115	ERF	PeNAC089	582	596	+	16.9062	7.79e-07	0.0222	ccaccaccaccacca
AT2G04038	AtbZIP48	bZIP	PeNAC078	539	552	+	17.1406	7.81e-07	0.0534	tccacgtcatccca
AT4G32800	ERF043	ERF	PeNAC016	325	340	+	18.0625	7.82e-07	0.077	caccgccgacacagta
AT3G21175	GATA24	GATA	PeNAC021	434	448	-	15.3594	7.82e-07	0.0322	AAATCATCATCATCA
AT2G22750	AT2G22750	bHLH	PeNAC094	487	503	-	17.411	7.82e-07	0.0302	CGTGCTGGACACGTGGA
AT1G69570	CDF5	Dof	PeNAC053	200	226	+	16.7344	7.82e-07	0.00562	tgtgctctttttcctttttaactttca
AT5G17430	BBM	AP2	PeNAC074	842	861	-	16.962	7.83e-07	0.00123	AAAAAAGAAGGAAAGATAAG
AT2G01930	BPC1	BBR-BPC	PeNAC102	822	845	-	11.5312	7.84e-07	0.00087	CCTAAATAGAGAGAGAGAGAGGAG
AT5G18450	DREB2G	ERF	PeNAC089	584	598	-	17.2812	7.86e-07	0.0267	GATGGTGGTGGTGGT
AT5G11260	HY5	bZIP	PeNAC002	226	240	+	17.6719	7.86e-07	0.0405	ggtgatgacgtcatc
AT1G32510	ANAC011	NAC	PeNAC052	899	919	-	17.3529	7.87e-07	0.0345	GTACCTTCAATTGCAAGCAAT
AT1G32510	ANAC011	NAC	PeNAC078	901	921	-	17.3529	7.87e-07	0.0345	GTACCTTCAATTGCAAGCAAT
AT5G62940	DOF5.6	Dof	PeNAC065	192	212	-	15.6719	7.88e-07	0.0114	AAAAAGAGCAAAAAGAAGAGG
AT1G49720	ABF1	bZIP	PeNAC091	732	750	+	15.7326	7.88e-07	0.0211	ccacacgtggcctcgctgc
AT1G49480	REM19	B3	PeNAC034	701	715	-	16.7794	7.88e-07	0.00329	AAGAAAAAAAAAAAA
AT5G09410	EICBP.B	CAMTA	PeNAC017	266	277	-	16.8438	7.89e-07	0.038	GAAGCGCGTGAC
AT1G49010	AT1G49010	MYB	PeNAC056	757	771	+	15.5625	7.89e-07	0.162	ctgcaccttatcctc
AT2G20180	PIF1	bHLH	PeNAC085	749	762	-	17.2466	7.89e-07	0.0263	AAAGGGGCACGTGG
AT4G38000	DOF4.7	Dof	PeNAC024	182	209	+	16.4531	7.89e-07	0.00322	ctctctctttttttcttttctttttttt
AT3G56850	DPBF3	bZIP	PeNAC094	624	638	-	17.8594	7.91e-07	0.0399	AACGGACACGTGTCG
AT2G01570	RGA	GRAS	PeNAC048	33	52	+	16.4429	7.91e-07	0.00297	gagagggagagaaggagaga
AT3G10580	AT3G10580	MYB_related	PeNAC079	109	123	-	16.0676	7.93e-07	0.0818	GTTAAGGATAAGCAT
AT5G66940	DOF5.8	Dof	PeNAC072	840	868	+	16.4688	7.95e-07	0.00607	tgttcccttttctttcctttttttttctc
AT3G13810	AtIDD11	C2H2	PeNAC079	957	977	+	16.5781	7.98e-07	0.0531	tgtctgcttttgtcttgttgt
AT5G65130	AT5G65130	ERF	PeNAC103	488	502	-	16.9688	8.01e-07	0.018	ACGCCTCCTCCGCCG
AT4G37180	HHO5	G2-like	PeNAC006	764	774	-	15.2188	8.01e-07	0.166	CGAAAGATTCC
AT5G42520	BPC6	BBR-BPC	PeNAC084	265	285	+	11.4658	8.06e-07	0.00106	ctctctctttttctatatatt
AT2G45660	SOC1	MIKC_MADS	PeNAC102	818	838	+	16.6522	8.07e-07	0.00088	gcctctcctctctctctctct
AT1G32510	ANAC011	NAC	PeNAC043	7	27	-	17.3088	8.08e-07	0.0345	ATGACTTGGGGTTGAAGAAAG
AT1G03800	ERF10	ERF	PeNAC089	572	592	+	16.8438	8.08e-07	0.0197	gtaaccaccaccaccaccacc
AT4G31610	REM1	B3	PeNAC091	763	772	+	15.3675	8.09e-07	0.168	gctacaccac
AT4G38910	BPC5	BBR-BPC	PeNAC044	104	133	-	-23.6582	8.09e-07	0.001	TGAGTGCGAGTGAGTTTGAGAGAGGGAGAC
AT5G67000	ERF122	ERF	PeNAC103	482	496	+	17.0685	8.11e-07	0.0603	tttgtacggcggagg
AT4G31060	ERF015	ERF	PeNAC064	442	461	+	17.5469	8.13e-07	0.0576	ccaccgacgaaccgaaccgg
AT2G45680	TCP9	TCP	PeNAC091	318	338	-	15.8971	8.14e-07	0.0553	CCATTAAAAGTGGGTCCAACT
AT5G17430	BBM	AP2	PeNAC003	384	403	-	16.9241	8.14e-07	0.00127	AAAAAAAAAAGAGAGAGAAT
AT4G38000	DOF4.7	Dof	PeNAC078	76	103	+	16.4219	8.14e-07	0.00322	tcgtttctttctttcttttttttttttt
AT4G38000	DOF4.7	Dof	PeNAC074	842	869	+	16.4219	8.14e-07	0.00322	cttatctttccttctttttttttttttc
AT1G03800	ERF10	ERF	PeNAC014	469	489	+	16.8281	8.16e-07	0.0197	gtgtccacctcctccaccgtt
AT5G49330	MYB111	MYB	PeNAC089	629	638	-	16.1827	8.16e-07	0.113	TGGTAGGTGG
AT1G52890	NAC019	NAC	PeNAC079	135	146	-	16.2821	8.17e-07	0.131	GACACGTAACCC
AT1G69570	CDF5	Dof	PeNAC086	806	832	-	16.6875	8.18e-07	0.00562	TATTGTCTTTTTTTTTTTTTTTTGGTC
AT1G69570	CDF5	Dof	PeNAC078	80	106	+	16.6875	8.18e-07	0.00562	ttctttctttcttttttttttttttta
AT2G45660	SOC1	MIKC_MADS	PeNAC034	697	717	+	16.6377	8.2e-07	0.00088	ttttttttttttttttctttc
AT2G45660	SOC1	MIKC_MADS	PeNAC072	857	877	+	16.6377	8.2e-07	0.00088	tttttttttctctctctattt
AT2G45660	SOC1	MIKC_MADS	PeNAC074	860	880	+	16.6377	8.2e-07	0.00088	tttttttttctctctctattt
AT5G61600	ERF104	ERF	PeNAC073	808	826	+	16.6562	8.22e-07	0.0206	ccgcaccatcaccgtcacc
AT4G36730	GBF1	bZIP	PeNAC094	767	776	+	15.0632	8.24e-07	0.0307	ccacgtggcg
AT2G01570	RGA	GRAS	PeNAC094	357	376	-	16.4	8.26e-07	0.00303	AAAAAAAAGAGAAAAAGAAA
AT5G42520	BPC6	BBR-BPC	PeNAC007	875	895	+	11.3973	8.27e-07	0.00108	ctctctctctctctccagtta
AT3G23250	MYB15	MYB	PeNAC065	651	671	-	16.5781	8.31e-07	0.0605	CCTCTTCACACCCACCATCCC
AT1G52880	NAC018	NAC	PeNAC052	50	68	+	16.3125	8.31e-07	0.171	tgccttaccggacacgcca
AT2G45660	SOC1	MIKC_MADS	PeNAC072	549	569	+	16.6232	8.34e-07	0.00089	ccttagtctctctctctcttt
AT5G17430	BBM	AP2	PeNAC074	846	865	-	16.8987	8.34e-07	0.00129	AAAAAAAAAAGAAGGAAAGA
AT5G04390	AT5G04390	C2H2	PeNAC031	625	635	-	13.2188	8.34e-07	0.0864	TAGTGAAGGGG
AT1G49480	REM19	B3	PeNAC083	49	63	-	16.7353	8.35e-07	0.00334	AAAAGAAAAAAAAAA
AT1G49480	REM19	B3	PeNAC020	282	296	+	16.7353	8.35e-07	0.00334	aaaagaaaaaaaaaa
AT2G22750	AT2G22750	bHLH	PeNAC021	379	395	+	17.3151	8.35e-07	0.0302	cttgcttgccacgtgga
AT1G29160	DOF1.5	Dof	PeNAC083	500	520	+	15.7656	8.36e-07	0.028	aagaaaaagaaaaagaaaaaa
AT3G15510	NAC056	NAC	PeNAC074	494	510	+	17.5938	8.37e-07	0.039	cttgacgtccaaggaac
AT3G15510	NAC056	NAC	PeNAC072	510	526	+	17.5938	8.37e-07	0.039	cttgacgtccaaggaac
AT1G10120	BHLH74	bHLH	PeNAC073	721	741	+	17.411	8.38e-07	0.0819	cacgttcaccacgtgtcacct
AT2G01570	RGA	GRAS	PeNAC094	351	370	-	16.3857	8.38e-07	0.00303	AAGAGAAAAAGAAAAGAGGG
AT4G01500	NGA4	B3	PeNAC028	230	245	+	15.9688	8.41e-07	0.168	tttgttcaggtgtatt
AT2G01930	BPC1	BBR-BPC	PeNAC095	225	248	-	11.3594	8.41e-07	0.00093	AGGTGAGAGAAAGAGAGAAAACAG
AT2G38090	AT2G38090	MYB	PeNAC003	51	71	-	16.8734	8.41e-07	0.086	AAGGAATCGGATAAGATTAGT
AT3G55370	OBP3	Dof	PeNAC020	270	290	-	16.2344	8.43e-07	0.00631	TTTTCTTTTTTTTTTCATGTT
AT5G65130	AT5G65130	ERF	PeNAC014	476	490	+	16.8906	8.43e-07	0.018	cctcctccaccgttt
AT3G50410	DOF3.4	Dof	PeNAC097	85	105	+	15.3906	8.43e-07	0.00799	tctgtttttctttttcttttt
AT3G50410	DOF3.4	Dof	PeNAC013	107	127	+	15.3906	8.43e-07	0.00799	tctgtttttctttttcttttt
AT3G50410	DOF3.4	Dof	PeNAC012	108	128	+	15.3906	8.43e-07	0.00799	tctgtttttctttttcttttt
AT3G50410	DOF3.4	Dof	PeNAC030	973	993	-	15.3906	8.43e-07	0.00799	TGGCCTTTTTTTCTTCTTTTC
AT5G25390	SHN3	ERF	PeNAC014	472	492	+	14.5942	8.47e-07	0.0111	tccacctcctccaccgtttta
AT2G45660	SOC1	MIKC_MADS	PeNAC065	127	147	+	16.6087	8.48e-07	0.0009	ttcttccttctttgtctttcc
AT3G57230	AGL16	MIKC_MADS	PeNAC051	212	226	+	17.2188	8.49e-07	0.175	tttcccattttggca
AT4G38000	DOF4.7	Dof	PeNAC055	225	252	+	16.375	8.53e-07	0.00322	ttttttttttcctggtttttccttttgg
AT4G38000	DOF4.7	Dof	PeNAC061	626	653	+	16.375	8.53e-07	0.00322	gtgattgttttcttcttttttctttttt
AT3G23220	ERF095	ERF	PeNAC081	582	596	-	16.7812	8.57e-07	0.0429	AGATGGCGGCTGGGA
AT4G38910	BPC5	BBR-BPC	PeNAC024	180	209	-	-23.9367	8.57e-07	0.00105	AAAAAAAAGAAAAGAAAAAAAGAGAGAGAT
AT2G01930	BPC1	BBR-BPC	PeNAC102	816	839	-	11.3125	8.57e-07	0.00094	TAGAGAGAGAGAGAGGAGAGGCTG
AT3G55370	OBP3	Dof	PeNAC085	980	1000	-	16.2188	8.58e-07	0.00631	TTTTCTTTTTTTTTTCCTCTC
AT3G23240	ERF1B	ERF	PeNAC081	579	606	+	16.8594	8.59e-07	0.0473	cattcccagccgccatctttcctatacg
AT5G13910	LEP	ERF	PeNAC089	581	601	+	16.5938	8.6e-07	0.0397	accaccaccaccaccatcacc
AT2G45660	SOC1	MIKC_MADS	PeNAC091	530	550	+	16.5942	8.62e-07	0.00091	tgctcttttttcttttttttt
AT2G45660	SOC1	MIKC_MADS	PeNAC039	933	953	+	16.5942	8.62e-07	0.00091	tttctttgttttctgcttttt
AT2G01930	BPC1	BBR-BPC	PeNAC061	443	466	-	11.2969	8.62e-07	0.00094	GAGAAGAAGAGAAGAGAAGAGAAG
AT5G02460	DOF5.1	Dof	PeNAC020	280	300	+	16.3125	8.63e-07	0.00666	aaaaaagaaaaaaaaaataaa
AT5G17430	BBM	AP2	PeNAC094	283	302	+	16.8608	8.64e-07	0.00131	aaaaaaaaaggaaaaaaaag
AT5G17430	BBM	AP2	PeNAC059	827	846	+	16.8608	8.64e-07	0.00131	agggagaaaaagaggagaaa
AT5G51910	TCP19	TCP	PeNAC023	213	222	-	16.4149	8.65e-07	0.0412	TGGGCCCCGC
AT1G76870	AT1G76870	Trihelix	PeNAC056	342	355	+	15.4375	8.65e-07	0.178	tcccaaaaccggca
AT2G01930	BPC1	BBR-BPC	PeNAC089	350	373	+	11.2812	8.68e-07	0.00094	aaaaaagagagagagatacaggta
AT3G20310	ERF7	ERF	PeNAC089	582	602	+	16.7344	8.7e-07	0.0145	ccaccaccaccaccatcacca
AT1G36060	ERF055	ERF	PeNAC064	439	452	-	17.375	8.7e-07	0.0425	TTCGTCGGTGGAGA
AT1G03840	MGP	C2H2	PeNAC005	584	603	-	17.4375	8.7e-07	0.0704	GACAAAACGACAAACCAGAC
AT3G23240	ERF1B	ERF	PeNAC060	236	263	+	16.8281	8.72e-07	0.0473	cccagccagccgccatctttttacacgt
AT3G24050	GATA1	GATA	PeNAC014	474	488	-	17.0588	8.74e-07	0.0112	ACGGTGGAGGAGGTG
AT2G45660	SOC1	MIKC_MADS	PeNAC046	66	86	+	16.5797	8.76e-07	0.00092	tctctctctctctcttttcag
AT3G23210	BHLH34	bHLH	PeNAC019	529	551	-	17.1562	8.8e-07	0.0229	CGGAGCGGCACGCGGCGAGGCTA
AT3G23210	BHLH34	bHLH	PeNAC017	530	552	-	17.1562	8.8e-07	0.0229	CGGAGCGGCACGCGGCGAGGCTA
AT4G38000	DOF4.7	Dof	PeNAC062	403	430	+	16.3438	8.8e-07	0.00322	tctctctttctttcttttctgttttttt
AT4G38000	DOF4.7	Dof	PeNAC083	502	529	-	16.3438	8.8e-07	0.00322	ATGAACTCTTTTTTTCTTTTTCTTTTTC
AT2G27300	NTL8	NAC	PeNAC043	7	25	+	17.0938	8.82e-07	0.0754	ctttcttcaaccccaagtc
AT3G15500	NAC055	NAC	PeNAC052	50	70	+	16.3281	8.83e-07	0.0979	tgccttaccggacacgccact
AT4G27950	CRF4	ERF	PeNAC014	867	887	+	15.8088	8.84e-07	0.019	caagcgccgtcacggcaattg
AT3G23220	ERF095	ERF	PeNAC103	485	499	+	16.7188	8.87e-07	0.0429	gtacggcggaggagg
AT3G55370	OBP3	Dof	PeNAC020	276	296	-	16.1875	8.88e-07	0.00631	TTTTTTTTTTCTTTTTTTTTT
AT1G09540	MYB61	MYB	PeNAC033	591	605	-	16.3281	8.89e-07	0.0618	CCTACCCACCGAAGC
AT5G61600	ERF104	ERF	PeNAC089	583	601	+	16.5156	8.89e-07	0.0206	caccaccaccaccatcacc
AT2G45680	TCP9	TCP	PeNAC063	323	343	+	15.7059	8.89e-07	0.0553	gtgtgggctgtggtccccacc
AT2G01930	BPC1	BBR-BPC	PeNAC061	445	468	-	11.2188	8.9e-07	0.00096	AAGAGAAGAAGAGAAGAGAAGAGA
AT2G45660	SOC1	MIKC_MADS	PeNAC022	685	705	+	16.5652	8.9e-07	0.00093	ctctttttttttcttttcttt
AT1G71450	ERF021	ERF	PeNAC073	808	827	+	16.6094	8.91e-07	0.0126	ccgcaccatcaccgtcacca
AT5G13910	LEP	ERF	PeNAC089	578	598	+	16.5312	8.91e-07	0.0397	accaccaccaccaccaccatc
AT4G31060	ERF015	ERF	PeNAC051	769	788	+	17.4219	8.95e-07	0.0576	ccaccggcgtagtcaccggc
AT4G36160	ANAC076	NAC	PeNAC032	812	826	+	16.5469	8.97e-07	0.0629	cttggaacagaagca
AT4G16750	ERF039	ERF	PeNAC064	437	451	+	17.1719	8.98e-07	0.0347	tatctccaccgacga
AT5G63090	LOB	LBD	PeNAC051	768	788	+	16.0156	8.99e-07	0.0326	cccaccggcgtagtcaccggc
AT1G72360	HRE1	ERF	PeNAC089	576	596	+	16.4531	9.02e-07	0.0437	ccaccaccaccaccaccacca
AT1G51600	GATA28	GATA	PeNAC089	580	598	+	14.589	9.05e-07	0.0244	caccaccaccaccaccatc
AT1G09540	MYB61	MYB	PeNAC044	130	144	+	16.3125	9.07e-07	0.0618	ctcacccaccgagcc
AT2G22750	AT2G22750	bHLH	PeNAC087	475	491	+	17.1918	9.08e-07	0.0302	aacgtgtgaaacgtggc
AT3G61120	AGL13	MIKC_MADS	PeNAC009	738	755	-	17.3382	9.08e-07	0.0933	TTACTTAAAAAAGAAAAA
AT1G36060	ERF055	ERF	PeNAC016	324	337	-	17.3281	9.09e-07	0.0425	TGTGTCGGCGGTGC
AT1G36060	ERF055	ERF	PeNAC015	694	707	-	17.3281	9.09e-07	0.0425	TGTGTCGGCGGTGC
AT5G42520	BPC6	BBR-BPC	PeNAC094	418	438	+	11.1507	9.09e-07	0.00118	cactctctctccctctcccat
AT4G38910	BPC5	BBR-BPC	PeNAC048	32	61	+	-24.2278	9.1e-07	0.00111	agagagggagagaaggagagagccgccaca
AT3G23250	MYB15	MYB	PeNAC055	607	627	-	16.4844	9.1e-07	0.0605	TGTGCACCCCCCCACCACCCC
AT1G28370	ERF11	ERF	PeNAC026	829	843	+	16.8906	9.11e-07	0.0574	cagacaccgccgcag
AT2G01570	RGA	GRAS	PeNAC034	708	727	-	16.3	9.13e-07	0.00323	AGGAAAGCGAGAAAGAAAAA
AT4G34410	ERF109	ERF	PeNAC059	516	530	+	17.375	9.15e-07	0.0755	gtcattacggcgcag
AT4G36160	ANAC076	NAC	PeNAC057	181	195	+	16.5312	9.15e-07	0.0629	cgtgacgtccaagca
AT4G36160	ANAC076	NAC	PeNAC058	484	498	+	16.5312	9.15e-07	0.0629	cgtgacgtccaagca
AT1G06070	AT1G06070	bZIP	PeNAC081	658	668	+	18.1096	9.15e-07	0.185	cccagctggca
AT1G69570	CDF5	Dof	PeNAC059	797	823	-	16.5625	9.19e-07	0.00607	CTTTGCCTTTTCTTTTTTTTTTTGTAA
AT2G45660	SOC1	MIKC_MADS	PeNAC055	213	233	+	16.5362	9.2e-07	0.00095	gtctcttttctcttttttttt
AT2G45660	SOC1	MIKC_MADS	PeNAC072	846	866	+	16.5362	9.2e-07	0.00095	cttttctttcctttttttttc
AT5G66940	DOF5.8	Dof	PeNAC094	267	295	-	16.3281	9.21e-07	0.00677	TTCCTTTTTTTTTTTGCTTTTCGAGACGT
AT4G38000	DOF4.7	Dof	PeNAC024	181	208	+	16.2969	9.22e-07	0.0033	tctctctctttttttcttttcttttttt
AT1G35460	BHLH80	bHLH	PeNAC096	420	430	+	17.2344	9.23e-07	0.183	agcaagtggcc
AT1G72010	TCP22	TCP	PeNAC063	330	342	+	17.5156	9.23e-07	0.0316	ctgtggtccccac
AT1G51700	DOF1.7	Dof	PeNAC025	530	550	-	15.3281	9.24e-07	0.00938	TGGAGCAAAAAGCAAAAGCAA
AT1G21910	ERF012	ERF	PeNAC089	573	592	+	17.25	9.24e-07	0.0254	taaccaccaccaccaccacc
AT1G69690	TCP15	TCP	PeNAC101	665	677	+	17.3125	9.26e-07	0.0368	atgtggtccccac
AT5G20240	PI	MIKC_MADS	PeNAC040	251	264	+	16.5781	9.26e-07	0.0924	gcaaaaaaggaaaa
AT2G01570	RGA	GRAS	PeNAC018	977	996	-	16.2857	9.26e-07	0.00323	GAGAGAGAGAGAGAGAGCAG
AT5G17430	BBM	AP2	PeNAC011	332	351	+	16.7848	9.29e-07	0.0014	gaaggaaagaaaaagaaaag
AT1G64620	DOF1.8	Dof	PeNAC094	280	298	+	15.1094	9.3e-07	0.0876	caaaaaaaaaaaggaaaaa
AT5G06950	TGA2	bZIP	PeNAC010	318	337	+	17.4219	9.3e-07	0.0636	catgacgtcagtttccctac
AT3G47620	TCP14	TCP	PeNAC101	667	686	-	10.3837	9.34e-07	0.0469	GAGTGGACGGTGGGGACCAC
AT2G45660	SOC1	MIKC_MADS	PeNAC040	251	271	-	16.5217	9.35e-07	0.00096	TCTTTTTTTTTCCTTTTTTGC
AT4G38000	DOF4.7	Dof	PeNAC032	691	718	+	16.2812	9.36e-07	0.0033	atctctctttttattttttttcttttaa
AT3G50260	ERF011	ERF	PeNAC024	603	617	+	17.2656	9.36e-07	0.023	tccaagccaccgcca
AT5G03150	JKD	C2H2	PeNAC005	584	603	+	17.1562	9.38e-07	0.0743	gtctggtttgtcgttttgtc
AT1G46768	RAP2-1	ERF	PeNAC064	439	451	-	17.4062	9.39e-07	0.0561	TCGTCGGTGGAGA
AT3G15510	NAC056	NAC	PeNAC011	613	629	-	17.4062	9.4e-07	0.039	CTTGGAACCCAAGTAAC
AT1G78700	BEH4	BES1	PeNAC101	695	705	+	17.7969	9.45e-07	0.169	tgcacgtgtcg
AT5G10280	MYB92	MYB	PeNAC027	251	260	-	14.9863	9.46e-07	0.196	GTTAGGTGGA
AT5G44210	ERF9	ERF	PeNAC089	573	593	-	16.0781	9.47e-07	0.0287	TGGTGGTGGTGGTGGTGGTTA
AT4G15090	FAR1	FAR1	PeNAC017	264	278	+	17.7344	9.47e-07	0.0602	cggtcacgcgcttca
AT2G01930	BPC1	BBR-BPC	PeNAC072	547	570	-	11.0625	9.48e-07	0.00102	AAAAGAGAGAGAGAGACTAAGGTT
AT3G15510	NAC056	NAC	PeNAC057	181	197	+	17.3906	9.49e-07	0.039	cgtgacgtccaagcaac
AT3G15510	NAC056	NAC	PeNAC058	484	500	+	17.3906	9.49e-07	0.039	cgtgacgtccaagcaac
AT2G45660	SOC1	MIKC_MADS	PeNAC065	194	214	+	16.5072	9.51e-07	0.00097	tcttctttttgctcttttttt
AT5G61600	ERF104	ERF	PeNAC001	796	814	-	16.3906	9.53e-07	0.0206	GGTCGGTTCAGCCGCCGGG
AT5G49300	GATA16	GATA	PeNAC021	430	456	-	8.8046	9.54e-07	0.0388	GTAGATGTAAATCATCATCATCATCAT
AT3G08500	MYB83	MYB	PeNAC098	744	754	+	16.1875	9.55e-07	0.0815	gatgttggtgg
AT1G09530	PIF3	bHLH	PeNAC023	266	275	+	16.9531	9.57e-07	0.0635	tgccacgtgg
AT1G09530	PIF3	bHLH	PeNAC021	385	394	+	16.9531	9.57e-07	0.0635	tgccacgtgg
AT1G51600	GATA28	GATA	PeNAC073	814	832	+	14.4658	9.59e-07	0.0244	catcaccgtcaccatcaca
AT5G65130	AT5G65130	ERF	PeNAC019	233	247	+	16.6719	9.59e-07	0.0185	ccatcggcaccgacg
AT5G02460	DOF5.1	Dof	PeNAC088	674	694	-	16.2188	9.6e-07	0.00714	AGAAAAGGTAAGAAAAAAACA
AT1G69570	CDF5	Dof	PeNAC022	679	705	+	16.5156	9.6e-07	0.00607	tttacactctttttttttcttttcttt
AT5G62380	NAC101	NAC	PeNAC088	643	663	-	17.125	9.6e-07	0.0394	TTGCTTGGAACTTAAGCTTGG
AT3G61250	AtMYB17	MYB	PeNAC018	720	734	+	16.7188	9.61e-07	0.198	ttgtaggtaggtggc
AT3G47620	TCP14	TCP	PeNAC023	213	232	-	10.2907	9.61e-07	0.0469	AAGCATTAGGTGGGCCCCGC
AT1G72360	HRE1	ERF	PeNAC026	829	849	+	16.3281	9.62e-07	0.0437	cagacaccgccgcaggggttg
AT3G50410	DOF3.4	Dof	PeNAC062	247	267	-	15.2969	9.63e-07	0.00871	TCTCTTCTTTTCTTCCTTTTA
AT4G28140	ERF054	ERF	PeNAC089	579	598	-	17.0312	9.63e-07	0.0216	GATGGTGGTGGTGGTGGTGG
AT3G11020	DREB2B	ERF	PeNAC015	691	711	-	17.1875	9.63e-07	0.0516	TAACTGTGTCGGCGGTGCACG
AT1G51700	DOF1.7	Dof	PeNAC024	192	212	-	15.2969	9.66e-07	0.00938	AAAAAAAAAAAGAAAAGAAAA
AT5G10030	TGA4	bZIP	PeNAC002	231	241	+	17.4531	9.7e-07	0.1	tgacgtcatcc
AT5G25190	ERF003	ERF	PeNAC034	192	210	-	16.5938	9.7e-07	0.0292	GGATCGTTGCGGTGGAGCC
AT4G21330	DYT1	bHLH	PeNAC069	594	607	+	17.0481	9.72e-07	0.175	cggtaaacacgtga
AT3G48430	REF6	C2H2	PeNAC073	16	27	+	17.9315	9.72e-07	0.0616	agaaacagagta
AT5G62470	MYB96	MYB	PeNAC089	573	590	-	16.6562	9.72e-07	0.0849	TGGTGGTGGTGGTGGTTA
AT1G21910	ERF012	ERF	PeNAC015	685	704	+	17.1719	9.73e-07	0.0254	gctacacgtgcaccgccgac
AT2G30340	LBD13	LBD	PeNAC051	773	789	+	16.875	9.74e-07	0.0631	cggcgtagtcaccggcc
AT1G69570	CDF5	Dof	PeNAC078	84	110	+	16.5	9.74e-07	0.00607	ttctttctttttttttttttttacggt
AT5G47220	ERF2	ERF	PeNAC089	582	602	+	16.3906	9.75e-07	0.0237	ccaccaccaccaccatcacca
AT2G36270	ABI5	bZIP	PeNAC094	622	639	-	17.4219	9.76e-07	0.0381	GAACGGACACGTGTCGAT
AT5G51190	ERF105	ERF	PeNAC023	523	537	-	16.6406	9.76e-07	0.0647	TCCAAGGCGGCGGCT
AT4G38910	BPC5	BBR-BPC	PeNAC025	718	747	-	-24.5823	9.77e-07	0.00118	TGCAAGAGACAGAATTGGACAGAGATAGAG
AT4G38910	BPC5	BBR-BPC	PeNAC042	684	713	-	-24.5949	9.8e-07	0.00118	AGAGTAAGAAAGAAAAAACGAAAGGAAGCC
AT5G60130	AT5G60130	B3	PeNAC094	361	379	-	16.5781	9.8e-07	0.0379	AAGAAAAAAAAGAGAAAAA
AT4G38000	DOF4.7	Dof	PeNAC086	811	838	-	16.2344	9.8e-07	0.0034	CTTTTTTATTGTCTTTTTTTTTTTTTTT
AT5G24110	WRKY30	WRKY	PeNAC082	560	570	+	17.3438	9.81e-07	0.203	gaagtcaacgg
AT3G15500	NAC055	NAC	PeNAC023	719	739	+	16.2344	9.82e-07	0.0979	cgccttattgttcacgtcact
AT5G42520	BPC6	BBR-BPC	PeNAC061	454	474	+	10.9452	9.82e-07	0.00126	ttctcttcttctctttctcga
AT2G22540	SVP	MIKC_MADS	PeNAC092	138	152	+	17.1562	9.83e-07	0.182	tttttccagtttggg
AT1G72740	AT1G72740	MYB_related	PeNAC089	886	900	-	17.4265	9.83e-07	0.0675	TGGAAACCCTAATTC
AT3G55370	OBP3	Dof	PeNAC078	82	102	+	16.0938	9.84e-07	0.00675	ctttctttctttttttttttt
AT3G26790	FUS3	B3	PeNAC015	225	239	-	16.6406	9.84e-07	0.0413	CAAAGCATGCATGCA
AT2G01930	BPC1	BBR-BPC	PeNAC104	917	940	-	10.9531	9.91e-07	0.00105	AACTAATAGAGAGAGGGAAAAGGA
AT2G01930	BPC1	BBR-BPC	PeNAC029	952	975	-	10.9531	9.91e-07	0.00105	GAGAAGATGGATGAGAGAGAGAGA
AT1G72010	TCP22	TCP	PeNAC077	624	636	-	17.3906	9.94e-07	0.0316	GAGTGGGGCCCGT
AT5G61270	BHLH72	bHLH	PeNAC014	735	749	-	17.2603	9.96e-07	0.0381	GCTGGGGACACGTGG
AT2G45660	SOC1	MIKC_MADS	PeNAC097	89	109	+	16.4638	9.98e-07	0.00099	tttttctttttctttttttga
AT2G45660	SOC1	MIKC_MADS	PeNAC013	111	131	+	16.4638	9.98e-07	0.00099	tttttctttttctttttttga
AT2G45660	SOC1	MIKC_MADS	PeNAC012	112	132	+	16.4638	9.98e-07	0.00099	tttttctttttctttttttga
AT2G45660	SOC1	MIKC_MADS	PeNAC094	349	369	+	16.4638	9.98e-07	0.00099	cgccctcttttctttttctct
AT5G67000	ERF122	ERF	PeNAC034	193	207	-	16.8356	9.98e-07	0.0603	TCGTTGCGGTGGAGC
AT2G02080	IDD4	C2H2	PeNAC005	587	603	-	17.2031	1e-06	0.148	GACAAAACGACAAACCA
AT2G31220	BHLH10	bHLH	PeNAC025	938	951	+	17.2656	1.01e-06	0.0659	gactgtgtcggtgt
AT5G54230	MYB49	MYB	PeNAC018	723	737	-	16.0312	1.01e-06	0.208	ACGGCCACCTACCTA
AT5G64060	anac103	NAC	PeNAC011	612	632	+	16.9375	1.01e-06	0.0207	agttacttgggttccaagtta
AT2G01930	BPC1	BBR-BPC	PeNAC082	892	915	+	10.9062	1.01e-06	0.00106	ttcagaaagagggaaggagagagg
AT2G01570	RGA	GRAS	PeNAC086	798	817	+	16.2	1.01e-06	0.00346	aagaagaagaccaaaaaaaa
AT1G32510	ANAC011	NAC	PeNAC057	177	197	+	16.9265	1.01e-06	0.0345	cagacgtgacgtccaagcaac
AT1G32510	ANAC011	NAC	PeNAC058	480	500	+	16.9265	1.01e-06	0.0345	cagacgtgacgtccaagcaac
AT4G38000	DOF4.7	Dof	PeNAC024	175	202	+	16.2031	1.01e-06	0.00344	atgttatctctctctttttttcttttct
AT1G30210	TCP24	TCP	PeNAC076	84	95	-	17.9844	1.01e-06	0.0511	AAGGGGACCACA
AT1G20640	NLP4	Nin-like	PeNAC023	655	669	-	16.2206	1.01e-06	0.0173	GTATCAGCAGCAGGG
[truncated: 5,029 more rows]
